# Supplementary material for: Highly regioselective ferrocenyl cyclohexene/cyclopentene isomerization through benzyne transfer coupling
Source: Royal Society of Chemistry journal article supplement (doi:10.1039/d2qo01836e), 2022-12-15
Supplement: d2qo01836e1.pdf [file d2qo01836e1.pdf]

# Supplementary Information

## High Regioselectivity Ferrocenyl Cyclohexene/Cyclopentene Isomerization through Benzyne Transfer Coupling

Yajuan Zhang, Jie Dong, Yu Lei, Lingli Zong, Ke Zhang, and Yimin Hu\*

*School of Chemistry and Materials Science, Anhui Normal University,*

*Wuhu, Anhui 241002, China E-mail: [yiminhu@ahnu.edu.cn](mailto:yiminhu@ahnu.edu.cn)*

## Contents

|                                                                              |     |
|------------------------------------------------------------------------------|-----|
| 1. General Experimental Procedures.....                                      | S2  |
| 2. Characterization Data for the New Compounds.....                          | S5  |
| 3. X-Ray Structure for <b>3a</b> , <b>3b</b> , <b>3c</b> and <b>3t</b> ..... | S18 |
| 4. <sup>1</sup> H and <sup>13</sup> C NMR Spectra for New Compounds.....     | S20 |
| 5. Computational Details.....                                                | S47 |

## 1. General experimental procedures

The catalytic reactions were performed under an argon atmosphere using the oven-dried Schlenk flask. All reactions without catalyst were carried out under air. The chemicals were purchased from Aladdin and TCI Chemicals. All solvents and materials were pre-dried, redistilled or recrystallized before use.  $^1\text{H}$  NMR (400 MHz) and  $^{13}\text{C}$  NMR (101 MHz) spectra were recorded on a Bruker Avance 400 spectrometer with  $\text{CDCl}_3$  as the solvent. Chemical shifts are reported in ppm by assigning TMS resonance in the  $^1\text{H}$  NMR spectra as 0.00 ppm and  $\text{CDCl}_3$  resonance in the  $^{13}\text{C}$  spectra as 77.0 ppm. All coupling constants ( $J$  values) were reported in Hertz (Hz). Column chromatography was performed on silica gel 300–400 mesh. Melting points were determined using a Gallenkamp melting point apparatus and are uncorrected. The FT-IR spectra were recorded from KBr pellets or thin film from  $\text{CHCl}_3$  on the NaCl window in the 4000–400  $\text{cm}^{-1}$  ranges on a Nicolet 5DX spectrometer. High-resolution mass spectra were recorded on a Waters G2-XS Qtof mass spectrometer. X-ray Crystallography diffraction data of **3a**, **3b**, **3c** and **3t** were collected at room temperature with a Bruker SMART Apex CCD diffractometer with Mo- $K\alpha$  radiation ( $\lambda = 0.71073 \text{ \AA}$ ) with a graphite monochromator using the  $\omega$ -scan mode. Data reductions and absorption corrections were performed with SAINT and SADABS software, respectively. The structure was solved by direct methods and refined on  $F^2$  by full-matrix least squares using SHELXTL. All non-hydrogen atoms were treated anisotropically. The positions of hydrogen atoms were generated geometrically.

### (1) General procedure for preparation of tetrayne 1:

Preparation of catalyst  $\text{Pd}(\text{PPh}_3)_2\text{Cl}_2$ :

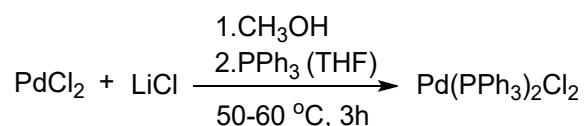

3.54 g  $\text{PdCl}_2$  and 4 g  $\text{LiCl}$  were mixed in a 500 mL three-necked flask with 150–200 mL methanol as solvent, magnetically stirred and heated in oil bath at 50–60  $^\circ\text{C}$ . After the solid was dissolved, 25 mL of THF (removed water with sodium wire) containing 13.1 g  $\text{PPh}_3$  were added in the above three-necked flask, and the color of the solution changed from brown to yellow, reflux reaction for 3 hours. After reaction solution cooled, filtered and washed with anhydrous ethanol, yellow solid  $\text{Pd}(\text{PPh}_3)_2\text{Cl}_2$  catalyst was obtained finally.

Preparation of diyne substrates:

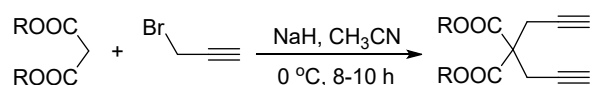

R = Me, Et,  $i$ Pr

10 g NaH (60%) and 200-300 mL acetonitrile were added in 500 mL three-necked flask with magnetic stirring. 100 mmol malonate and 30 g 3-bromopropyne (98%) were added in the above 500 mL three-necked flask dropwise in turn by separatory funnel, magnetically stirred for 8-10 h under ice-water bath. The organic phase was extracted with ethyl acetate and dried with anhydrous MgSO<sub>4</sub>. The solvent was evaporated in vacuo and diyne substrates as white solid were obtained finally.

Preparation of brominated alkynes:

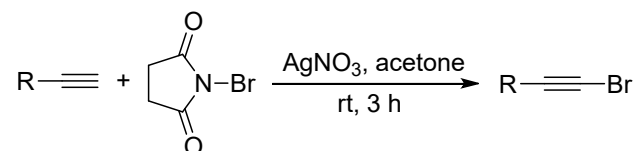

21.36 g 1-bromopyrrolidine-2, 5-dione (NBS), 0.85 g AgNO<sub>3</sub>, and 100 mmol phenylacetylene or substituted phenylacetylene or alkyl alkyne were added in 250 mL three-necked flask in turn, 150 mL acetone as a solvent, magnetically stirred at room temperature for 3 h. The organic phase was extracted with *n*-hexane and dried with anhydrous MgSO<sub>4</sub>. The solvent was evaporated in vacuo and brominated alkynes compound as brown solid were obtained finally.

Preparation of tetrayne substrates:

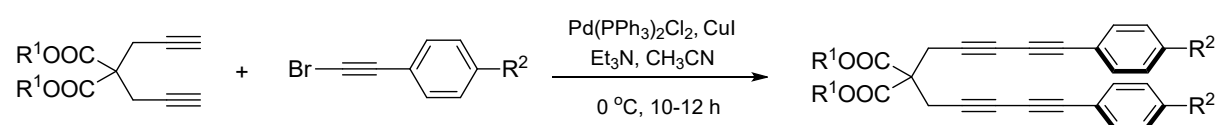

R<sup>1</sup> = Me, Et, <sup>*i*</sup>Pr

R<sup>2</sup> = H, *p*-Me, *p*-Et, *p*-<sup>*i*</sup>Pr, *p*-Cl, *p*-F, *p*-OMe, *m*-Me, *m*-Cl, *m*-F

0.6 g Pd(PPh<sub>3</sub>)<sub>2</sub>Cl<sub>2</sub>, 0.5 g CuI and 40 mmol diyne substrate were added in 500 mL three-necked flask, protected with anhydrous anaerobic conditions under argon. After 0.5 h, 250-300 mL acetonitrile, 16.16 g Et<sub>3</sub>N and 100 mmol brominated aryl alkyne were added in turn, magnetically stirred for 10-12 h under ice-water bath. The organic phase was extracted with ethyl acetate and dried with anhydrous MgSO<sub>4</sub>. It was separated by column chromatography on silica gel to obtain tetrayne substrate as white solid finally.

## (2) General procedure for preparation of functionalized aromatic ferrocene derivative 3:

Tetraynes (1.0 mmol), cyclohexenyl/cyclopentenyl ferrocene (1.0 equiv) were added to toluene (3 mL), the mixture was stirred at room temperature then heated at 110 °C for 6 hours in air. Then the reaction mixture was cooled to room temperature, quenched with saturated NaCl, and extracted with ethyl acetate (3×10 mL). The combined organic extracts were dried over anhydrous MgSO<sub>4</sub>, filtered, and concentrated under reduced pressure. The crude product was purified by column chromatography on silica gel (petroleum ether /ethyl acetate = 80/1) to afford functionalized aromatic ferrocene derivatives.

## References:

1. (a) J. Chen, V. Palani and T. R. Hoye, Reactions of HDDA-derived benzyne with sulfides: mechanism, modes, and three-component reactions, *J. Am. Chem. Soc.*, 2016, **138**, 4318–4321; (b) N. K. Lee, S. Y. Yun, P. Mamidipalli, R. M. Salzman, D. Lee, T. Zhou and Y. Xia, Hydroarylation of arynes catalyzed by silver for biaryl synthesis, *J. Am. Chem. Soc.*, 2014, **136**, 4363–4368; (c) B. Liu, C. Mao, Q. Hu, L. Yao and Y. Hu, Direct methylation and carbonylation of in situ generated arynes via HDDA-Wittig coupling, *Org. Chem. Front.*, 2019, **6**, 2788–2791; (d) X. Zheng, B. Liu, F. Yang, Q. Hu, L. Yao, Y. Hu, Access to benzoxazepines and fully substituted indoles via HDDA coupling, *Org. Lett.*, 2020, **22**, 956–959.
2. (a) X. Li, C. Han, H. Yao and A. Lin, Organocatalyzed [3 + 2] annulation of cyclopropenones and  $\beta$ -ketoesters: an approach to substituted butenolides with a quaternary center, *Org. Lett.*, 2017, **19**, 778–781; (b) C. M. Vanos and T. H. Lambert, Development of a catalytic platform for nucleophilic substitution: cyclopropenone-catalyzed chlorodehydration of alcohols, *Angew. Chem. Int. Ed.*, 2011, **50**, 12222–12226.
3. (a) L. Yao, Q. Hu, Y. Lei, L. Bao and Y. Hu, C-O/C-S difunctionalized benzene derivatives via multicomponent coupling of tetraynes, *Org. Chem. Front.*, 2020, **7**, 3633–3637; (b) L. Yao, B. Fang, Q. Hu, Y. Lei, L. Bao and Y. Hu, Phenanthrenes/dihydrophenanthrenes: the selectivity controlled by different benzyne and allenes, *Chem. Commun.*, 2020, **56**, 15185–15188; (c) D. Zhang, M. Li, J. Li, A. Lin and H. Yao, Rhodium-catalyzed intermolecular enantioselective Alder-ene type reaction of cyclopentenes with silylacetylenes, *Nat. Chem.*, 2021, **12**, 6627; (d) V. Palani, J. Chen, T. R. Hoye, Reactions of Hexadehydro-Diels-Alder (HDDA)-Derived Benzyne with Thioamides: Synthesis of Dihydrobenzothiazino-Heterocyclics, *Org. Lett.*, 2016, **18**, 6312–6315.

## 2. Characterization Data for the New Compounds

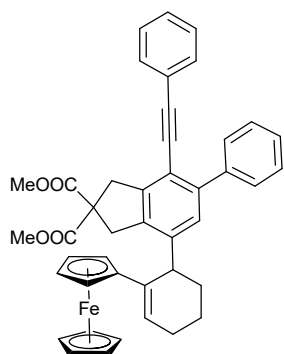

### Dimethyl 7-(2-ferrocenyl-2-en-1-yl)-5-phenyl-4-(phenylethynyl)-1H-indene-2, 2(3H)-dicarboxylate (3a)

White solid; 559.6 mg (83%); m. p. 194-198 °C; TLC (petroleum ether/EtOAc = 8:1):  $R_f$  = 0.50;  $^1\text{H NMR}$  (400 MHz,  $\text{CDCl}_3$ )  $\delta$  7.59-7.27 (m, 2H), 7.42-7.30 (m, 8H), 7.07 (s, 1H), 6.23 (s, 1H), 4.44 (s, 1H), 4.16-3.98 (m, 9H), 3.94-3.92 (m, 2H), 3.87 (d,  $J$  = 6.4 Hz, 6H), 3.81-3.71 (m, 2H), 2.30-2.18 (m, 2H), 2.08-2.00 (m, 1H), 1.85-1.81 (m, 1H), 1.60-1.59 (m, 2H);  $^{13}\text{C NMR}$  (101 MHz,  $\text{CDCl}_3$ )  $\delta$  172.2, 172.1, 143.4, 142.5, 141.8, 140.6, 131.4, 128.3, 128.1, 127.2, 123.8, 123.6, 115.6, 95.5, 87.4, 69.3, 68.3, 68.0, 66.8, 64.6, 60.1, 53.2, 41.3, 40.6, 39.4, 29.4, 25.6, 17.2. **FT-IR** (KBr):  $\nu$  = 3642, 2948, 1736, 1438, 1241, 1070, 818, 752, 702, 487  $\text{cm}^{-1}$ ; **HRMS** (WATERS):  $m/z$  calcd for  $\text{C}_{43}\text{H}_{38}\text{FeO}_4$   $[\text{M}+\text{H}]^+$  675.2198, found 675.2195.

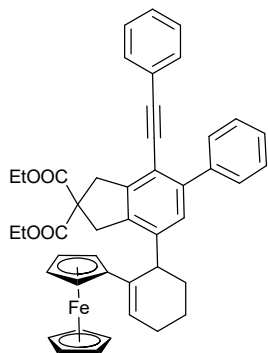

### Diethyl 7-(2-ferrocenyl-2-en-1-yl)-5-phenyl-4-(phenylethynyl)-1H-indene-2, 2(3H)-dicarboxylate (2b)

White solid; 598 mg (85%); m. p. 157-160 °C; TLC (petroleum ether/EtOAc = 8:1):  $R_f$  = 0.65;  $^1\text{H NMR}$  (400 MHz,  $\text{CDCl}_3$ )  $\delta$  7.59-7.57 (d,  $J$  = 7.6 Hz, 2H), 7.42-7.31 (m, 8H), 7.08 (s, 1H), 7.10 (d,  $J$  = 4.4 Hz, 1H), 6.26 (s, 1H), 4.40 (s, 1H), 4.37-4.30 (m, 4H), 4.12-4.01 (m, 9H), 3.74-3.87 (m, 2H), 3.80 (d,  $J$  = 16.4 Hz, 2H), 2.24-2.17 (m, 2H), 2.09-2.03 (m, 1H), 1.85 (d,  $J$  = 12.8 Hz, 1H), 1.61 (s, 2H), 1.36 (q,  $J$  = 6.8 Hz, 6H);  $^{13}\text{C NMR}$  (101 MHz,  $\text{CDCl}_3$ )  $\delta$  171.9, 171.8, 171.6, 143.6, 142.5, 141.9, 141.8, 140.7, 140.6, 136.9, 128.6, 127.8, 127.2, 123.7, 115.7, 115.5, 95.6, 95.4, 87.9, 87.5, 86.7, 69.0, 67.8, 67.5, 66.8, 64.4, 62.0, 61.8, 60.0, 59.4, 41.2, 41.0, 40.5, 39.9, 39.3, 32.8, 29.4, 25.7, 23.3, 17.2, 14.2, 14.1. **FT-IR** (KBr):  $\nu$  = 3464, 2940, 1731, 1441, 1237, 1064, 814, 757, 696, 489  $\text{cm}^{-1}$ ; **HRMS** (WATERS):  $m/z$  calcd for  $\text{C}_{45}\text{H}_{42}\text{FeO}_4$   $[\text{M}+\text{H}]^+$  703.2511, found 703.2507.

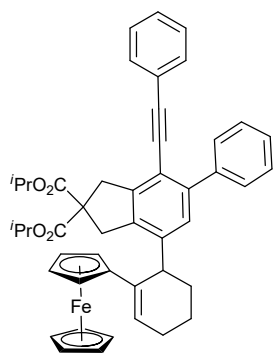

**Diisopropyl 7-(2-ferrocenyl-2-en-1-yl)-5-phenyl-4-(phenylethynyl)-1H-indene-2,2(3H)-dicarboxylate (3c)**

White solid; 592 mg (81 % yield); m. p. 153-158 °C; TLC (petroleum ether/EtOAc = 8:1):  $R_f = 0.84$ ;  $^1\text{H NMR}$  (400 MHz,  $\text{CDCl}_3$ )  $\delta$  7.59-7.56 (m, 2H), 7.41-7.31 (m, 8H), 7.07 (s, 1H), 6.26 (s, 1H), 5.22-5.12 (m, 2H), 4.40 (t,  $J = 1.0$  Hz, 1H), 4.12-3.96 (m, 9H), 3.92-3.78 (m, 4H), 2.28-2.17 (m, 2H), 2.08-2.03 (m, 1H), 1.87-1.83 (m, 2H), 1.60 (s, 2H), 1.37-1.32 (m, 12H);  $^{13}\text{C NMR}$  (101 MHz,  $\text{CDCl}_3$ )  $\delta$  171.3, 143.8, 142.4, 140.7, 134.0, 129.5, 128.0, 127.1, 123.8, 123.7, 115.5, 95.4, 87.5, 69.4, 66.9, 64.5, 60.0, 41.1, 40.5, 39.3, 29.4, 26.9, 25.6, 22.7, 21.7, 17.2, 14.2. **FT-IR** (KBr):  $\nu = 3449, 2935, 1725, 1460, 1246, 1193, 1105, 816, 758, 695, 488$   $\text{cm}^{-1}$ ; **HRMS** (WATERS):  $m/z$  calcd for  $\text{C}_{47}\text{H}_{40}\text{FeO}_4$   $[\text{M}+\text{H}]^+$  731.2824, found 731.2826.

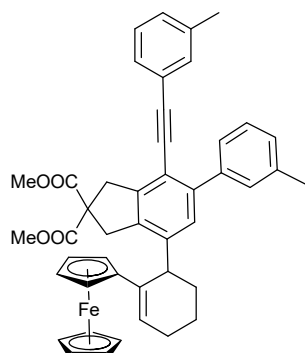

**Dimethyl 7-(2-ferrocenyl-2-en-1-yl)-5-(m-tolyl)-4-(m-tolylolethynyl)-1H-indene-2,2(3H)-dicarboxylate (3d)**

White solid; 563 mg (80 % yield); m. p. 157-159 °C; TLC (petroleum ether/EtOAc = 8:1):  $R_f = 0.56$ ;  $^1\text{H NMR}$  (400 MHz,  $\text{CDCl}_3$ )  $\delta$  7.43 (s, 1H), 7.34-7.28 (m, 2H), 7.21-7.13 (m, 5H), 7.07 (s, 1H), 6.25 (s, 1H), 4.40 (t,  $J = 1.0$  Hz, 1H), 4.12-4.01 (m, 9H), 3.93 (s, 2H), 3.87 (d,  $J = 7.2$  Hz, 6H), 3.78-3.74 (m, 2H), 2.37 (d,  $J = 21.6$  Hz, 6H), 2.28-2.19 (m, 2H), 2.08-2.02 (m, 1H), 1.85-1.81 (m, 1H), 1.60 (s, 2H);  $^{13}\text{C NMR}$  (101 MHz,  $\text{CDCl}_3$ )  $\delta$  172.2, 172.1, 131.9, 128.9, 128.6, 128.4, 128.3, 128.1, 127.9, 127.7, 126.6, 123.8, 123.5, 115.6, 95.7, 87.3, 69.4, 60.0, 53.2, 41.3, 40.7, 39.9, 39.2, 29.6, 23.4, 21.2, 17.2. **FT-IR** (KBr):  $\nu = 3470, 2929, 1746, 1437, 1242, 1067, 883, 820, 785, 697, 489$   $\text{cm}^{-1}$ ; **HRMS** (WATERS):  $m/z$  calcd for  $\text{C}_{45}\text{H}_{42}\text{FeO}_4$   $[\text{M}+\text{H}]^+$  703.2505, found 703.2507.

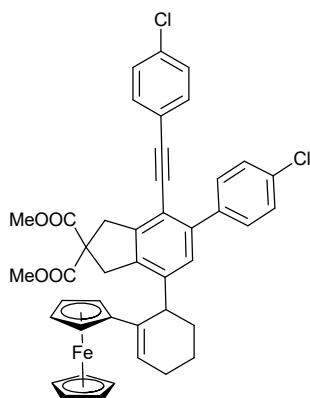

**Dimethyl 5-(4-chlorophenyl)-4-((4-chlorophenyl)ethynyl)-7-(2-ferroenceyl-2-en-1-yl)-1H-indene-2,2(3H)-dicarboxylate (3e)**

White solid; 632 mg (85 % yield); m. p. 135-137 °C; TLC (petroleum ether/EtOAc = 8:1):  $R_f = 0.57$ ;  $^1\text{H NMR}$  (400 MHz,  $\text{CDCl}_3$ )  $\delta$  7.48 (d,  $J = 8.0$  Hz, 2H), 7.36 (d,  $J = 8.4$  Hz, 2H), 7.33-7.30 (m, 4H), 7.00 (s, 1H), 6.20 (s, 1H), 4.51 (s, 1H), 4.21-4.10 (m, 8H), 3.93-3.90 (m, 4H), 3.86 (d,  $J = 4.4$  Hz, 6H), 3.76-3.72 (m, 1H), 2.29 (s, 2H), 2.07-2.00 (m, 1H), 1.82-1.79 (m, 1H), 1.58-1.53 (m, 2H);  $^{13}\text{C NMR}$  (101 MHz,  $\text{CDCl}_3$ )  $\delta$  172.1, 141.2, 137.3, 134.2, 133.8, 133.4, 132.5, 130.7, 128.7, 128.2, 128.0, 123.9, 121.8, 115.2, 94.7, 88.1, 69.2, 68.2, 66.7, 64.5, 60.1, 53.2, 41.2, 40.5, 39.3, 29.4, 25.6, 17.3. **FT-IR** (KBr):  $\nu = 3434, 2936, 1731, 1576, 1437, 1243, 1067, 868, 786, 490$   $\text{cm}^{-1}$ ; **HRMS** (WATERS):  $m/z$  calcd for  $\text{C}_{43}\text{H}_{36}\text{Cl}_2\text{FeO}_4$   $[\text{M}+\text{H}]^+$  743.1418, found 743.1409.

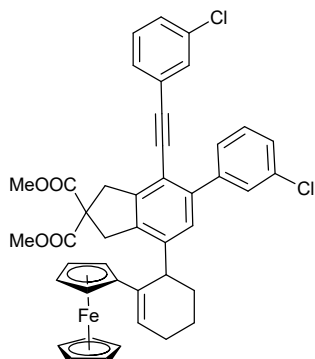

**Dimethyl 5-(3-chlorophenyl)-4-((3-chlorophenyl)ethynyl)-7-(2-ferrocenyl-2-en-1-yl)-1H-indene-2,2(3H)-dicarboxylate (3f)**

White solid; 661 mg (89 % yield); m. p. 187-189 °C; TLC (petroleum ether/EtOAc = 8:1):  $R_f = 0.54$ ;  $^1\text{H NMR}$  (400 MHz,  $\text{CDCl}_3$ )  $\delta$  7.64 (s, 1H), 7.40-7.33 (m, 4H), 7.29-7.25 (m, 3H), 6.24 (s, 1H), 4.48 (s, 1H), 4.18-4.14 (m, 7H), 4.07 (s, 1H), 3.96 (s, 1H), 3.90 (s, 2H), 3.87 (d,  $J = 6.0$  Hz, 6H), 3.80-3.72 (m, 2H), 2.33-2.22 (m, 2H), 2.07-2.02 (m, 1H), 1.82 (d,  $J = 12.0$  Hz, 1H), 1.60-1.58 (m, 2H);  $^{13}\text{C NMR}$  (101 MHz,  $\text{CDCl}_3$ )  $\delta$  172.0, 143.7, 142.5, 142.4, 142.1, 137.5, 134.2, 129.2, 128.1, 127.4, 124.0, 115.1, 94.6, 88.1, 69.3, 68.3, 68.2, 66.7, 64.6, 59.9, 53.3, 41.2, 40.5, 39.4, 29.4, 25.6, 17.2. **FT-IR** (KBr):  $\nu = 3462, 2936,$

1735, 1589, 1440, 1249, 1075, 881, 783, 491  $\text{cm}^{-1}$ ; **HRMS** (WATERS):  $m/z$  calcd for  $\text{C}_{43}\text{H}_{36}\text{Cl}_2\text{FeO}_4$   $[\text{M}+\text{H}]^+$  743.1418, found 743.1413.

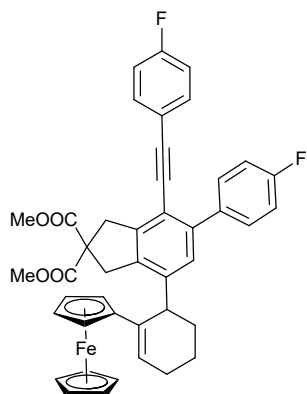

**Dimethyl 5-(4-fluorophenyl)-4-((4-fluorophenyl)ethynyl)-7-(2-ferrocenyl-2-en-1-yl)-1H-indene-2,2(3H)-dicarboxylate (3g)**

White solid; 589 mg (83 % yield); m. p. 175-176  $^{\circ}\text{C}$ ; TLC (petroleum ether/EtOAc = 8:1):  $R_f$  = 0.50;  $^1\text{H}$  NMR (400 MHz,  $\text{CDCl}_3$ )  $\delta$  7.52 (t,  $J$  = 13.6 Hz, 2H), 7.36-7.33 (m, 2H), 7.11-7.01 (m, 5H), 6.26 (s, 1H), 4.43 (s, 1H), 4.14-4.11 (m, 6H), 4.02 (d,  $J$  = 11.2 Hz, 2H), 3.91-3.86 (m, 9H), 3.79-3.75 (m, 2H), 2.29-2.19 (m, 2H), 2.10-2.03 (m, 1H), 1.83 (d,  $J$  = 12.0 Hz, 1H), 1.60 (s, 2H);  $^{13}\text{C}$  NMR (101 MHz,  $\text{CDCl}_3$ )  $\delta$  172.2, 172.1, 172.0, 171.9, 163.7, 163.6, 161.2, 162.1, 143.6, 142.0, 141.4, 136.5 (d,  $J_{\text{C-F}}$  = 4.0 Hz), 133.2 (d,  $J_{\text{C-F}}$  = 8.1 Hz), 131.0, 128.2, 123.8, 119.6 (d,  $J_{\text{C-F}}$  = 3.0 Hz), 115.5, 115.4, 114.8, 114.6, 94.7, 87.0, 86.7, 69.0, 67.6 (d,  $J_{\text{C-F}}$  = 16.2 Hz), 67.5, 66.7, 64.5, 59.2, 53.1, 53.0, 41.1, 39.9, 32.7, 29.5, 23.3 (d,  $J_{\text{C-F}}$  = 4.0 Hz), 17.2. **FT-IR** (KBr):  $\nu$  = 3445, 2932, 1746, 1599, 1507, 1439, 1228, 1061, 834, 490  $\text{cm}^{-1}$ ; **HRMS** (WATERS):  $m/z$  calcd for  $\text{C}_{43}\text{H}_{36}\text{F}_2\text{FeO}_4$   $[\text{M}+\text{H}]^+$  711.2009, found 711.2004.

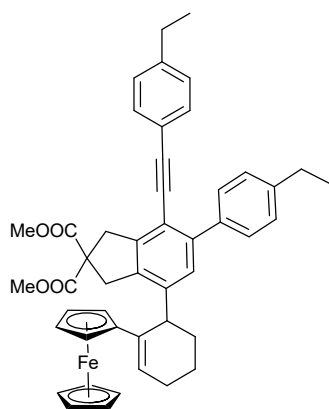

**Dimethyl 5-(4-ethylphenyl)-4-((4-ethylphenyl)ethynyl)-7-(2-ferrocenyl-2-en-1-yl)-1H-indene-2,2(3H)-dicarboxylate (3h)**

White solid; 585 mg (80 % yield); m. p. 151-153  $^{\circ}\text{C}$ ; TLC (petroleum ether/EtOAc = 8:1):  $R_f$  = 0.56;  $^1\text{H}$  NMR (400 MHz,  $\text{CDCl}_3$ )  $\delta$  7.52 (d,  $J$  = 8.0 Hz, 2H), 7.33 (d,  $J$  = 8.0 Hz, 2H), 7.24 (d,  $J$  = 8.0 Hz, 2H), 7.17 (d,  $J$  = 7.6 Hz, 2H), 7.08 (s, 1H), 6.25 (s, 1H), 4.44 (s, 1H), 4.38-4.30 (m, 4H), 4.14-4.03 (m, 9H), 3.95-3.88 (m, 2H), 3.82-3.78 (m, 2H), 2.75-2.65 (m, 4H), 2.30-2.20 (m, 2H), 2.08-2.03 (m, 1H), 1.87 (d,  $J$  = 12.8 Hz, 1H), 1.62 (s, 2H), 1.32-1.25 (m, 6H), 1.30-1.23 (m, 6H);  $^{13}\text{C}$  NMR (101 MHz,  $\text{CDCl}_3$ )  $\delta$



172.3, 172.2, 172.1, 143.3, 143.1, 142.9, 142.3, 141.7, 141.5, 136.5, 129.3, 137.8, 127.3, 120.9, 115.8, 115.7, 95.8, 95.7, 88.0, 87.1, 86.9, 86.7, 68.9, 67.8, 67.5, 66.8, 64.4, 59.2, 53.1, 53.0, 41.2, 40.5, 40.0, 39.4, 32.8, 28.7, 25.7, 23.3, 17.2, 15.7, 15.6, 15.4. **FT-IR** (KBr):  $\nu = 3463, 2929, 1736, 1510, 1437, 1244, 1162, 1060, 831, 487 \text{ cm}^{-1}$ ; **HRMS** (WATERS):  $m/z$  calcd for  $\text{C}_{47}\text{H}_{46}\text{FeO}_4$   $[\text{M}+\text{H}]^+$  731.2824, found 731.2827.

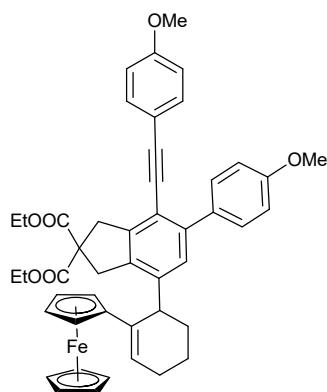

**Diethyl 5-(4-ferrocenyl)-4-((4-methoxyphenyl)ethynyl)-7-(2-methylcyclohex-2-en-1-yl)-1H-indene-2,2(3H)-dicarboxylate (3i)**

White solid; 625 mg (82 % yield); m. p. 83-85 °C; TLC (petroleum ether/EtOAc = 8:1):  $R_f = 0.33$ ;  **$^1\text{H}$  NMR** (400 MHz,  $\text{CDCl}_3$ )  $\delta$  7.53-7.51 (m, 2H), 7.34-7.31 (m, 2H), 7.03 (s, 1H), 6.93 (d,  $J = 8.8 \text{ Hz}$ , 2H), 6.85 (d,  $J = 8.8 \text{ Hz}$ , 2H), 6.25 (s, 1H), 4.38-4.39 (m, 1H), 4.34-4.30 (m, 4H), 4.12-3.99 (m, 9H), 3.89 (d,  $J = 4.8 \text{ Hz}$ , 2H), 3.79-3.77 (m, 2H), 2.26-2.15 (m, 2H), 2.07-2.05 (m, 1H), 1.85-1.81 (m, 1H), 1.60 (s, 2H), 1.38-1.28 (m, 6H);  **$^{13}\text{C}$  NMR** (101 MHz,  $\text{CDCl}_3$ )  $\delta$  147.6, 144.7, 143.8, 138.8, 137.3, 133.6, 129.8, 127.4, 124.9, 117.4, 98.7, 87.3, 77.2, 75.9, 53.6, 52.3, 33.8, 30.8, 30.1, 23.2, 21.9, 21.5, 19.3, 17.5, 13.9, 13.6. **FT-IR** (KBr):  $\nu = 3462, 2928, 1732, 1606, 1511, 1462, 1245, 1026, 826, 483 \text{ cm}^{-1}$ ; **HRMS** (WATERS):  $m/z$  calcd for  $\text{C}_{47}\text{H}_{46}\text{FeO}_6$   $[\text{M}+\text{H}]^+$  763.7169, found 763.7161.

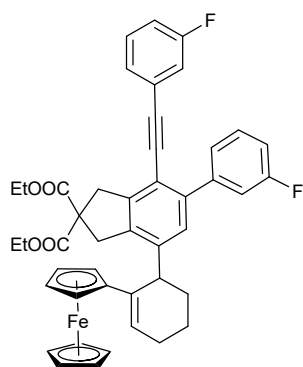

**Diethyl 5-(3-fluorophenyl)-4-((3-fluorophenyl)ethynyl)-7-(2-ferrocenyl-2-en-1-yl)-1H-indene-2,2(3H)-dicarboxylate (3j)**

White solid; 642 mg (87 % yield); m. p. 176-178 °C; TLC (petroleum ether/EtOAc = 8:1):  $R_f = 0.61$ ;  **$^1\text{H}$  NMR** (400 MHz,  $\text{CDCl}_3$ )  $\delta$  7.42-7.40 (m, 1H), 7.32-7.29 (m, 3H), 7.19-7.16 (m, 1H), 7.08-7.03 (m, 4H), 6.24 (s, 1H), 4.50 (s, 1H), 4.33 (t,  $J = 7.2 \text{ Hz}$ , 1H), 4.22-4.09 (m, 9H), 3.90 (d,  $J = 7.6 \text{ Hz}$ , 2H), 3.85-3.81

(m, 2H), 2.30 (s, 2H), 2.08-2.03 (m, 1H), 1.83 (d,  $J = 10.0$  Hz, 1H), 1.60 (s, 2H), 1.39-1.34 (m, 6H);  $^{13}\text{C}$  NMR (101 MHz,  $\text{CDCl}_3$ )  $\delta$  171.8, 171.6, 717.5, 163.6, 161.1, 143.9 (d,  $J_{\text{C-F}} = 10.0$  Hz), 137.5, 131.0, 130.0, 129.9 (d,  $J_{\text{C-F}} = 9.1$  Hz), 129.4, 128.6, 127.3, 124.0, 116.5, 115.4, 115.0 (d,  $J_{\text{C-F}} = 10.1$  Hz), 114.3 (d,  $J_{\text{C-F}} = 7.1$  Hz), 114.0 (d,  $J_{\text{C-F}} = 7.1$  Hz), 94.6, 87.9, 69.6, 66.9, 64.7, 62.1, 61.9, 59.9, 59.3, 41.1, 39.9, 39.3, 29.3, 23.3, 17.2, 14.1. **FT-IR** (KBr):  $\nu = 3439, 2929, 1736, 1491, 1436, 1246, 1162, 1086, 825, 486$   $\text{cm}^{-1}$ ; **HRMS** (WATERS):  $m/z$  calcd for  $\text{C}_{45}\text{H}_{40}\text{F}_2\text{FeO}_4$   $[\text{M}+\text{H}]^+$  739.2322, found 739.2318.

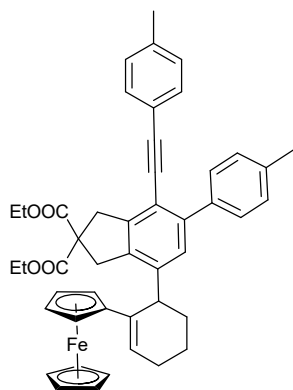

**Diethyl 7-(2-ferrocenyl-2-en-1-yl)-5-(p-tolyl)-4-(m-tolylolethynyl)-1H-indene-2, 2(3H)-dicarboxylate (3k)**

White solid; 592 mg (81 % yield); m. p. 166-168 °C; TLC (petroleum ether/EtOAc = 8:1):  $R_f = 0.68$ ;  $^1\text{H}$  NMR (400 MHz,  $\text{CDCl}_3$ )  $\delta$  7.50 (d,  $J = 8.0$  Hz, 2H), 7.33-7.28 (m, 2H), 7.21 (d,  $J = 8.0$  Hz, 2H), 7.14 (d,  $J = 8.0$  Hz, 2H), 7.07 (s, 1H), 6.26 (s, 1H), 4.40 (s, 1H), 4.12-3.98 (m, 4H), 3.94-3.91 (m, 2H), 3.81-3.77 (m, 2H), 2.39 (d,  $J = 10.0$  Hz, 6H), 2.28-2.18 (m, 2H), 2.12-2.02 (m, 1H), 1.86 (d,  $J = 13.2$  Hz, 1H), 1.61-1.60 (m, 2H), 1.37 (q,  $J = 7.2$  Hz, 6H);  $^{13}\text{C}$  NMR (101 MHz,  $\text{CDCl}_3$ )  $\delta$  171.9, 171.8, 171.6, 143.6, 143.5, 142.8, 142.2, 141.7, 141.5, 138.1, 134.1, 129.3, 128.3, 120.7, 115.7, 115.6, 95.7, 95.6, 87.9, 87.1, 86.9, 86.7, 69.0, 66.8, 64.4, 61.9, 61.7, 60.0, 59.3, 41.2, 41.1, 40.5, 39.9, 39.3, 32.8, 29.4, 23.0, 21.4, 17.2, 14.3. **FT-IR** (KBr):  $\nu = 3414, 2927, 1511, 1460, 1243, 1180, 1103, 1067, 895, 816, 489$   $\text{cm}^{-1}$ ; **HRMS** (WATERS):  $m/z$  calcd for  $\text{C}_{47}\text{H}_{46}\text{FeO}_4$   $[\text{M}+\text{H}]^+$  731.2824, found 731.2826.

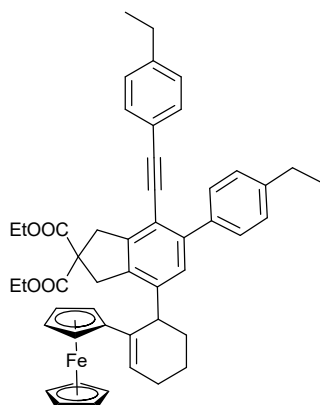

**Diethyl 5-(4-ethylphenyl)-4-((4-ethylphenyl)ethynyl)-7-(2-ferrocenyl-2-en-1-yl)-1H-indene-2, 2(3H)-dicarboxylate (3l)**

White solid; 599 mg (79 % yield); m. p. 150-154 °C; TLC (petroleum ether/EtOAc = 8:1):  $R_f = 0.73$ ;  $^1\text{H NMR}$  (400 MHz,  $\text{CDCl}_3$ )  $\delta$  7.51 (d,  $J = 8.0$  Hz, 2H), 7.31 (d,  $J = 8.0$  Hz, 2H), 7.22 (d,  $J = 8.0$  Hz, 2H), 7.15 (d,  $J = 8.0$  Hz, 2H), 7.05 (s, 1H), 6.23 (s, 1H), 4.43 (s, 1H), 4.14-3.97 (m, 9H), 3.92-3.90 (m, 2H), 3.85-3.80 (m, 2H), 2.73-2.64 (m, 4H), 2.29-2.16 (m, 2H), 2.09-2.09 (m, 1H), 1.84 (d,  $J = 11.6$  Hz, 1H), 1.58 (s, 2H), 1.38-1.35 (m, 6H), 1.31-1.23 (m, 6H);  $^{13}\text{C NMR}$  (101 MHz,  $\text{CDCl}_3$ )  $\delta$  172.0, 144.4, 143.5, 143.1, 142.3, 141.5, 136.6, 131.4, 128.2, 127.2, 121.0, 115.7, 95.6, 88.1, 87.1, 69.1, 68.9, 68.1, 67.8, 66.8, 64.4, 61.9, 60.0, 41.2, 40.5, 39.3, 28.9, 28.6, 25.7, 22.7, 17.2, 15.6, 15.4, 14.1, 11.5. **FT-IR** (KBr):  $\nu = 3464, 2929, 1730, 1511, 1461, 1242, 1187, 1068, 828, 489$   $\text{cm}^{-1}$ ; **HRMS** (WATERS):  $m/z$  calcd for  $\text{C}_{49}\text{H}_{50}\text{FeO}_4$   $[\text{M}+\text{H}]^+$  759.3137, found 759.3131.

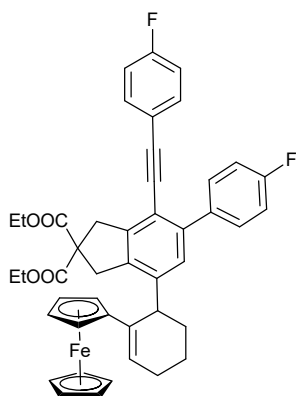

**Diethyl 5-(4-fluorophenyl)-4-((4-fluorophenyl) ethynyl)-7-(2-ferrocenyl-2-en-1-yl)-1H-indene-2,2(3H)-dicarboxylate (3m)**

White solid; 620 mg (84 % yield); m. p. 147-149 °C; TLC (petroleum ether/EtOAc = 8:1):  $R_f = 0.61$ ;  $^1\text{H NMR}$  (400 MHz,  $\text{CDCl}_3$ )  $\delta$  7.54-7.51 (m, 2H), 7.36-7.33 (m, 2H), 7.09 (t,  $J = 8.6$  Hz, 2H), 7.05-6.98 (m, 3H), 6.17 (s, 1H), 4.56 (s, 1H), 4.35-4.20 (m, 9H), 3.99 (d,  $J = 7.6$  Hz, 4H), 3.89 (d,  $J = 11.2$  Hz, 2H), 3.81-3.74 (m, 2H), 2.23 (s, 2H), 2.05-2.00 (m, 1H), 1.81 (d,  $J = 12.4$  Hz, 1H), 1.58 (s, 2H), 1.38-1.33 (m, 6H);  $^{13}\text{C NMR}$  (101 MHz,  $\text{CDCl}_3$ )  $\delta$  171.6, 163.6, 163.5, 161.2 (d,  $J_{\text{C-F}} = 16.2$  Hz), 143.6, 141.9, 141.4, 133.8, 133.2 (d,  $J_{\text{C-F}} = 14.1$  Hz), 131.0 (d,  $J_{\text{C-F}} = 8.1$  Hz), 128.1, 124.2, 119.6, 115.8, 115.3, 114, 94.4, 86.9, 70.0, 67.1, 64.7, 62.1, 59.9, 41.1, 40.4, 39.2, 31.7, 29.3, 25.5, 22.7, 17.1, 14.1. **FT-IR** (KBr):  $\nu = 3426, 2928, 1732, 1601, 1509, 1463, 1230, 1070, 836, 488$   $\text{cm}^{-1}$ ; **HRMS** (WATERS):  $m/z$  calcd for  $\text{C}_{45}\text{H}_{40}\text{F}_2\text{FeO}_4$   $[\text{M}+\text{H}]^+$  739.2322, found 739.2317.

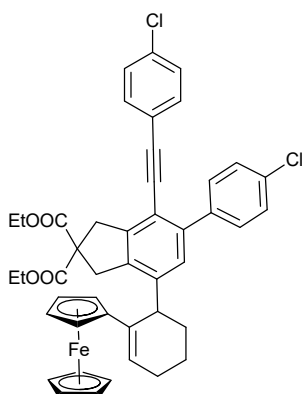

**Diethyl 5-(4-chlorophenyl)-4-((4-chlorophenyl) ethynyl)-7-(2-ferrocenyl-2-en-1-yl)-1H-indene-2,2(3H)-dicarboxylate (3n)**

White solid; 639 mg (83 % yield); m. p. 165-167 °C; TLC (petroleum ether/EtOAc = 8:1):  $R_f = 0.67$ ;  $^1\text{H NMR}$  (400 MHz,  $\text{CDCl}_3$ )  $\delta$  7.3 (s, 1H), 7.40-7.31 (m, 5H), 7.27-7.23 (m, 2H), 7.04 (s, 1H), 6.28 (s, 1H), 4.41 (s, 1H), 4.36-4.30 (m, 4H), 4.13-4.01 (m, 9H), 3.91-3.86 (m, 2H), 3.81-3.74 (m, 2H), 2.29-2.18 (m, 2H), 2.11-2.03 (m, 1H), 1.85-1.82 (m, 1H), 1.60 (s, 2H), 1.36 (q,  $J = 7.2$  Hz, 6H);  $^{13}\text{C NMR}$  (101 MHz,  $\text{CDCl}_3$ )  $\delta$  171.8, 171.6, 171.4, 143.8, 141.7, 141.2, 139.0, 138.9, 137.5, 137.3, 132.5, 128.7, 127.9, 121.9, 115.2, 115.1, 94.7, 94.6, 88.1, 69.2, 67.8, 67.6, 66.7, 64.5, 62.0, 61.8, 59.9, 59.3, 41.4, 41.0, 40.5, 39.8, 39.3, 32.7, 29.3, 23.3, 17.2, 14.2, 14.1. **FT-IR** (KBr):  $\nu = 3435, 2929, 1736, 1247, 1189, 1070, 873, 787, 683, 488$   $\text{cm}^{-1}$ ; **HRMS** (WATERS):  $m/z$  calcd for  $\text{C}_{45}\text{H}_{40}\text{Cl}_2\text{FeO}_4$   $[\text{M}+\text{H}]^+$  771.1731, found 771.1725.

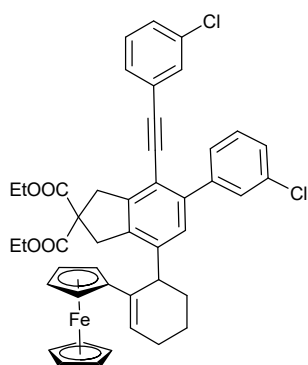

**Diethyl 5-(3-chlorophenyl)-4-((3-chlorophenyl) ethynyl)-7-(2-ferrocenyl-2-en-1-yl)-1H-indene-2,2(3H)-dicarboxylate (3o)**

White solid; 655 mg (85 % yield); m. p. 160-165 °C; TLC (petroleum ether/EtOAc = 8:1):  $R_f = 0.67$ ;  $^1\text{H NMR}$  (400 MHz,  $\text{CDCl}_3$ )  $\delta$  7.72 (s, 1H), 7.40-7.32 (m, 5H), 7.27-7.25 (m, 2H), 7.03 (s, 1H), 6.27 (s, 1H), 4.40 (t,  $J = 1.2$  Hz, 1H), 4.37-4.31 (m, 4H), 4.13-4.00 (m, 9H), 3.88 (d,  $J = 7.6$  Hz, 2H), 3.84-3.73 (m, 2H), 2.29-2.17 (m, 2H), 2.10-2.02 (m, 1H), 1.59 (s, 2H), 1.36 (q,  $J = 7.2$  Hz, 6H);  $^{13}\text{C NMR}$  (101 MHz,  $\text{CDCl}_3$ )  $\delta$  171.7, 171.6, 171.4, 142.4, 142.3, 142.1, 141.6, 141.1, 137.6, 134.2, 129.5, 128.0, 127.4, 123.8, 115.0, 94.5, 88.2, 87.7, 86.7, 69.0, 67.8, 67.5, 66.7, 64.5, 62.0, 61.8, 59.9, 59.3, 41.4, 40.9, 40.5, 39.8, 39.3, 32.7, 29.4, 25.6, 23.3, 17.2, 14.2, 14.1. **FT-IR** (KBr):  $\nu = 3437, 2929, 1736, 1469, 1246, 1189, 1070, 872, 786, 488$   $\text{cm}^{-1}$ ; **HRMS** (WATERS):  $m/z$  calcd for  $\text{C}_{45}\text{H}_{40}\text{Cl}_2\text{FeO}_4$   $[\text{M}+\text{H}]^+$  771.1731, found 771.1739.

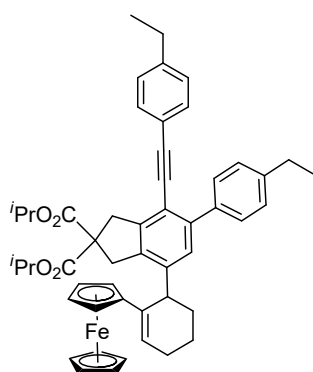

**Diisopropyl 5-(4-ethylphenyl)-4-((4-ethylphenyl) ethynyl)-7-(2-ferrocenyl-2-en-1-yl)-1H-indene-2, 2(3H)-dicarboxylate (3p)**

White solid; 629 mg (80 % yield); m. p. 171-173 °C; TLC (petroleum ether/EtOAc = 8:1):  $R_f = 0.80$ ;  $^1\text{H NMR}$  (400 MHz,  $\text{CDCl}_3$ )  $\delta$  7.50 (d,  $J = 8.0$  Hz, 2H), 7.30 (d,  $J = 8.0$  Hz, 2H), 7.22 (d,  $J = 8.0$  Hz, 2H), 7.15 (d,  $J = 8.0$  Hz, 2H), 7.05 (s, 1H), 6.24 (s, 1H), 5.22-5.12 (m, 2H), 4.40 (t,  $J = 1.2$  Hz, 1H), 4.11-3.95 (m, 9H), 3.90-3.77 (m, 4H), 2.72-2.63 (m, 4H), 2.27-2.16 (m, 2H), 2.09-2.00 (m, 1H), 1.87-1.83 (m, 1H), 1.60 (s, 2H), 1.36-1.32 (m, 12H), 1.30-1.23 (m, 6H);  $^{13}\text{C NMR}$  (101 MHz,  $\text{CDCl}_3$ )  $\delta$  171.5, 171.3, 171.1, 143.2, 143.1, 142.9, 142.2, 141.6, 141.4, 138.0, 129.4, 128.1, 127.1, 121.1, 115.8, 115.6, 95.7, 95.5, 87.2, 87.0, 86.8, 69.1, 68.2, 67.9, 67.5, 64.4, 59.9, 59.4, 41.1, 41.0, 40.5, 39.8, 39.3, 32.9, 28.7, 21.7, 21.5, 15.7, 15.6, 15.4. **FT-IR** (KBr):  $\nu = 3459, 2970, 2930, 1726, 1511, 1460, 1192, 1104, 827, 489$   $\text{cm}^{-1}$ ; **HRMS** (WATERS):  $m/z$  calcd for  $\text{C}_{51}\text{H}_{54}\text{FeO}_4$   $[\text{M}+\text{H}]^+$  787.3450, found 787.3442.

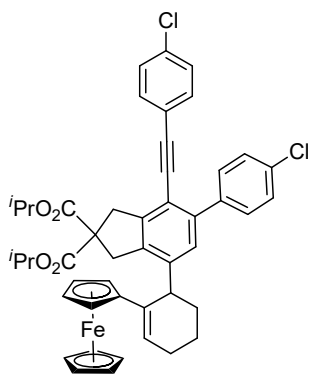

**Diisopropyl 5-(4-chlorophenyl)-4-((4-chlorophenyl) ethynyl)-7-(2-ferrocenyl-2-en-1-yl)-1H-indene-2, 2(3H)-dicarboxylate (3q)**

White solid; 679 mg (85 % yield); m. p. 181-183 °C; TLC (petroleum ether/EtOAc = 8:1):  $R_f = 0.77$ ;  $^1\text{H NMR}$  (400 MHz,  $\text{CDCl}_3$ )  $\delta$  7.62 (s, 1H), 7.39-7.31 (m, 5H), 7.27-7.25 (m, 2H), 7.03 (s, 1H), 6.28 (s, 1H), 5.22-5.12 (m, 2H), 4.41 (t,  $J = 1.2$  Hz, 1H), 4.13-3.99 (m, 9H), 3.93-3.89 (m, 1H), 3.83-3.81 (m, 2H), 3.73 (t,  $J = 1.2$  Hz, 1H), 2.29-2.18 (m, 2H), 2.11-2.02 (m, 1H), 1.85-1.82 (m, 1H), 1.61 (s, 2H), 1.37-1.33 (m, 12H);  $^{13}\text{C NMR}$  (101 MHz,  $\text{CDCl}_3$ )  $\delta$  171.3, 171.2, 171.1, 171.0, 144.0, 141.7, 141.1, 139.1, 139.0, 137.5, 137.3, 133.3, 130.7, 128.7, 122.0, 115.2, 94.6, 94.5, 88.3, 88.1, 69.2, 69.0, 68.0, 67.5, 64.5, 60.4, 59.9, 59.3, 40.9, 40.4, 39.8, 39.3, 32.7, 29.5, 29.3, 25.6, 21.6, 17.1, 14.2, 14.1. **FT-IR** (KBr):  $\nu = 3461, 2981, 2929, 1492, 1378, 1247, 1192, 1098, 824, 428$   $\text{cm}^{-1}$ ; **HRMS** (WATERS):  $m/z$  calcd for  $\text{C}_{47}\text{H}_{44}\text{Cl}_2\text{FeO}_4$   $[\text{M}+\text{H}]^+$  799.2044, found 799.2047.

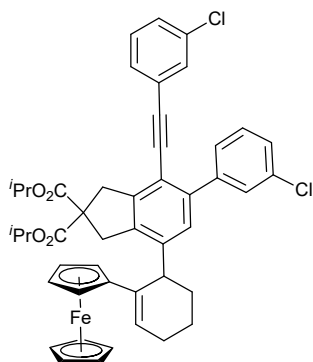

**Diisopropyl 5-(3-chlorophenyl)-4-((3-chlorophenyl) ethynyl)-7-(2-ferroceneyl-2-en-1-yl)-1H-indene-2, 2(3H)-dicarboxylate (3r)**

White solid; 686 mg (86 % yield); m. p. 147-148 °C; TLC (petroleum ether/EtOAc = 8:1):  $R_f = 0.71$ ;  $^1\text{H NMR}$  (400 MHz,  $\text{CDCl}_3$ )  $\delta$  7.47 (d,  $J = 8.4$  Hz, 2H), 7.35 (d,  $J = 8.4$  Hz, 2H), 7.30-7.29 (m, 4H), 7.01 (s, 1H), 6.26 (s, 1H), 5.21-5.12 (m, 2H), 4.40 (t,  $J = 1.2$  Hz, 1H), 4.12-3.99 (m, 9H), 3.92-3.88 (m, 1H), 3.82-3.81 (m, 2H), 3.78-3.74 (m, 1H), 2.26-2.17 (m, 2H), 2.07-2.02 (m, 1H), 1.84-1.81 (m, 1H), 1.61 (s, 2H), 1.36-1.32 (m, 12H);  $^{13}\text{C NMR}$  (101 MHz,  $\text{CDCl}_3$ )  $\delta$  171.2, 171.1, 144.1, 142.4, 142.3, 142.2, 141.6, 141.1, 137.6, 133.5, 130.7, 128.4, 127.4, 123.8, 115.0, 94.4, 88.2, 87.7, 86.7, 69.5, 68.9, 67.9, 67.4, 64.4, 59.9, 59.4, 41.0, 40.8, 40.5, 39.8, 39.2, 31.8, 29.5, 29.3, 23.3, 21.7, 17.2, 14.2. **FT-IR** (KBr):  $\nu = 3456, 2979, 2932, 1725, 1589, 1462, 1275, 1102, 818, 488$   $\text{cm}^{-1}$ ; **HRMS** (WATERS):  $m/z$  calcd for  $\text{C}_{47}\text{H}_{44}\text{Cl}_2\text{FeO}_4$   $[\text{M}+\text{H}]^+$  799.2044, found 799.2037.

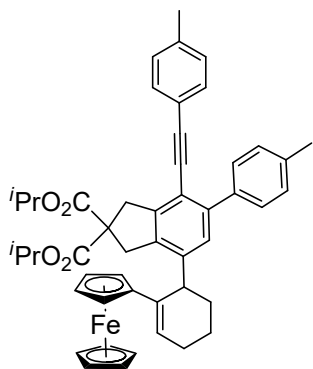

**Diisopropyl 7-(2-ferroceneyl-2-en-1-yl)-5-(m-tolyl)-4-(m-tolyethynyl)-1H-indene-2, 2(3H)-dicarboxylate (3s)**

White solid; 622 mg (82 % yield); m. p. 130-132 °C; TLC (petroleum ether/EtOAc = 8:1):  $R_f = 0.72$ ;  $^1\text{H NMR}$  (400 MHz,  $\text{CDCl}_3$ )  $\delta$  7.45 (s, 1H), 7.36-7.30 (m, 2H), 7.23-7.19 (m, 3H), 7.17-7.12 (m, 2H), 7.06 (s, 1H), 6.26 (s, 1H), 5.23-5.13 (m, 2H), 4.43 (s, 1H), 4.14-3.99 (m, 9H), 3.93-3.82 (m, 4H), 2.46-2.36 (m, 6H), 2.30-2.20 (m, 2H), 2.11-2.02 (m, 1H), 1.86 (d,  $J = 13.2$  Hz, 1H), 6.01 (s, 2H), 1.38-1.33 (m, 12H);  $^{13}\text{C NMR}$  (101 MHz,  $\text{CDCl}_3$ )  $\delta$  171.3, 137.1, 136.7, 134.0, 132.0, 130.2, 128.9, 128.4, 128.2, 127.9, 127.7, 126.7, 123.6, 115.6, 95.7, 87.4, 69.4, 69.1, 69.0, 68.2, 67.9, 66.9, 64.4, 41.1, 40.5, 39.3, 29.5, 25.6, 21.3, 17.2. **FT-IR** (KBr):  $\nu = 3459, 2930, 1727, 1458, 1377, 1343, 1187, 1104, 1104, 787, 490$   $\text{cm}^{-1}$ ; **HRMS** (WATERS):  $m/z$  calcd for  $\text{C}_{49}\text{H}_{50}\text{FeO}_4$   $[\text{M}+\text{H}]^+$  759.3137, found 759.3134.

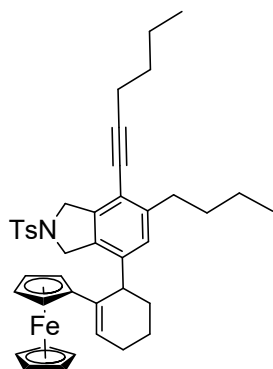

### 5-butyl-4-(hex-1-yn-1-yl)-7-(2-ferroceneyl-2-en-1-yl)-2-tosylisoindoline (3t)

White solid; 532 mg (79 % yield); m. p. 143-145 °C; TLC (petroleum ether/EtOAc = 8:1):  $R_f$  = 0.58;  $^1\text{H}$  NMR (400 MHz,  $\text{CDCl}_3$ )  $\delta$  7.84 (d,  $J$  = 8.0 Hz, 2H), 7.36 (d,  $J$  = 8.0 Hz, 2H), 6.88-6.82 (m, 1H), 6.24 (s, 1H), 4.84-4.64 (m, 4H), 4.38 (s, 1H), 4.12-4.05 (m, 6H), 3.96 (s, 1H), 3.67 (s, 1H), 3.57 (s, 1H), 2.74-2.67 (m, 1H), 2.62-2.54 (m, 1H), 2.49-2.46 (m, 4H), 2.27-2.22 (m, 2H), 1.20-1.92 (m, 1H), 1.77-1.76 (m, 1H), 1.63-1.59 (m, 3H), 1.54-1.48 (m, 6H), 1.29-1.24 (m, 2H), 1.00-0.97 (m, 3H), 0.87 (t,  $J$  = 7.2 Hz, 3H);  $^{13}\text{C}$  NMR (101 MHz,  $\text{CDCl}_3$ )  $\delta$  144.6, 144.3, 143.6, 143.1, 139.1, 139.0, 129.8, 127.6, 123.9, 116.0, 98.1, 69.2, 68.9, 68.0, 67.9, 66.7, 64.4, 54.6, 53.4, 40.6, 30.9, 29.7, 29.5, 22.4, 21.6, 17.2, 14.0, 13.9, 13.6. FT-IR (KBr):  $\nu$  = 2930, 2863, 1460, 1350, 1161, 1097, 1042, 815, 674  $\text{cm}^{-1}$ ; HRMS (WATERS):  $m/z$  calcd for  $\text{C}_{41}\text{H}_{47}\text{FeNO}_2\text{S}$   $[\text{M}+\text{H}]^+$  674.2755, found 674.2762.

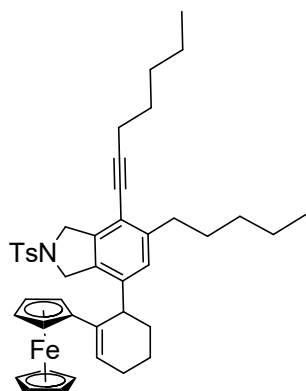

### 4-(hept-1-yn-1-yl)-7-(2-ferroceneyl-2-en-1-yl)-5-pentyl-2-tosylisoindoline (3u)

White solid; 540 mg (77 % yield); m. p. 108-112 °C; TLC (petroleum ether/EtOAc = 8:1):  $R_f$  = 0.55;  $^1\text{H}$  NMR (400 MHz,  $\text{CDCl}_3$ )  $\delta$  7.84 (d,  $J$  = 7.6 Hz, 2H), 7.36 (d,  $J$  = 8.0 Hz, 2H), 6.83 (s, 1H), 6.23 (s, 1H), 4.85-4.64 (m, 4H), 4.39 (s, 1H), 4.13-4.08 (m, 6H), 3.97 (s, 1H), 3.67 (s, 1H), 3.58 (s, 1H), 2.74-2.67 (m, 1H), 2.62-2.55 (m, 1H), 2.49-2.46 (m, 4H), 2.28-2.17 (m, 2H), 1.97-1.92 (m, 1H), 1.66-1.60 (m, 3H), 1.56-1.48 (m, 6H), 1.44-1.35 (m, 3H), 1.32-1.21 (m, 4H), 0.97 (t,  $J$  = 7.2 Hz, 3H), 0.85 (t,  $J$  = 7.0 Hz, 3H);  $^{13}\text{C}$  NMR (101 MHz,  $\text{CDCl}_3$ )  $\delta$  144.3, 143.6, 139.1, 133.8, 129.9, 127.6, 123.9, 116.0, 98.1, 69.3, 68.1, 68.0, 66.7, 64.5, 54.6, 53.4, 40.6, 31.1, 30.3, 29.7, 28.6, 25.6, 22.5, 17.2, 14.0. FT-IR (KBr):  $\nu$  = 3094, 2960, 2925, 2855, 1450, 1349, 1261, 1163, 1024, 809  $\text{cm}^{-1}$ ; HRMS (WATERS):  $m/z$  calcd for  $\text{C}_{43}\text{H}_{61}\text{FeNO}_2\text{S}$   $[\text{M}+\text{H}]^+$  702.3068, found 702.3063.

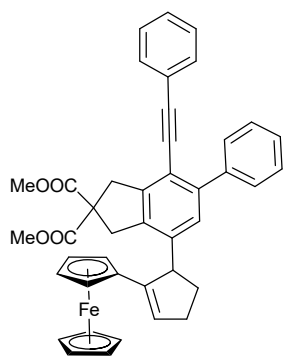

**2-ethyl 2-methyl 7-(2-ferrocenyl-2-en-1-yl)-5-phenyl-4-(phenylethynyl)-1H-indene-2, 2(3H)-dicarboxylate (3v)**

White solid; 541 mg (82 % yield); m. p. 179-183 °C; TLC (petroleum ether/EtOAc = 8:1):  $R_f = 0.49$ ;  $^1\text{H NMR}$  (400 MHz,  $\text{CDCl}_3$ )  $\delta$  7.63-7.62 (m, 2H), 7.43-7.40 (m, 5H), 7.33 (s, 3H), 7.09 (s, 1H), 6.08 (s, 1H), 4.45 (s, 1H), 4.28 (s, 1H), 4.17 (m, 2H), 4.10-4.07 (m, 6H), 3.95 (s, 2H), 3.89 (s, 3H), 3.83 (s, 3H), 2.59-2.47 (m, 3H), 1.94 (s, 1H), 1.40-1.31 (m, 2H);  $^{13}\text{C NMR}$  (101 MHz,  $\text{CDCl}_3$ )  $\delta$  172.2, 172.1, 143.5, 143.2, 142.1, 136.8, 131.4, 127.3, 125.1, 123.6, 115.6, 95.5, 87.6, 81.5, 69.1, 67.6, 66.0, 53.2, 50.5, 41.2, 39.7, 31.8, 31.5, 30.3, 21.1, 14.3. **FT-IR** (KBr):  $\nu = 3641, 2944, 2833, 1960, 1734, 1436, 1279, 1242, 1159, 696 \text{ cm}^{-1}$ ; **HRMS** (WATERS):  $m/z$  calcd for  $\text{C}_{42}\text{H}_{36}\text{FeO}_4$   $[\text{M}+\text{H}]^+$  661.2041, found 661.2045.

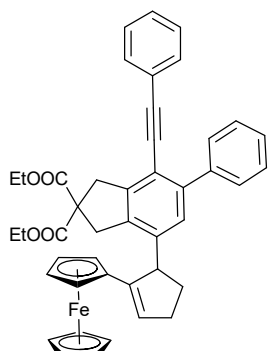

**Diethyl 7-(2-ferrocenyl-2-en-1-yl)-5-phenyl-4-(phenylethynyl)-1H-indene-2, 2(3H)-dicarboxylate (3w)**

White solid; 571 mg (83 % yield); m. p. 138-141 °C; TLC (petroleum ether/EtOAc = 8:1):  $R_f = 0.63$ ;  $^1\text{H NMR}$  (400 MHz,  $\text{CDCl}_3$ )  $\delta$  7.56 (d,  $J = 8.0 \text{ Hz}$ , 2H), 7.43-7.36 (m, 5H), 7.31-7.30 (m, 3H), 7.03 (s, 1H), 6.05 (s, 1H), 4.45 (s, 1H), 4.33-4.27 (m, 4H), 4.23-4.20 (m, 2H), 4.09-4.07 (m, 7H), 3.90-2.86 (m, 4H), 2.58-2.47 (m, 3H), 1.93-1.89 (m, 1H), 1.37-1.32 (m, 6H);  $^{13}\text{C NMR}$  (101 MHz,  $\text{CDCl}_3$ )  $\delta$  171.8, 171.7, 143.7, 143.1, 142.2, 142.0, 136.8, 131.4, 127.8, 126.8, 123.7, 115.5, 95.4, 87.5, 69.4, 68.4, 67.8, 66.1, 61.9, 59.9, 41.0, 39.6, 33.7, 31.7, 14.1. **FT-IR** (KBr):  $\nu = 3088, 2977, 2933, 2849, 1736, 1492, 1246, 1183, 1067, 762 \text{ cm}^{-1}$ ; **HRMS** (WATERS):  $m/z$  calcd for  $\text{C}_{44}\text{H}_{40}\text{FeO}_4$   $[\text{M}+\text{H}]^+$  689.2354, found 689.2349.



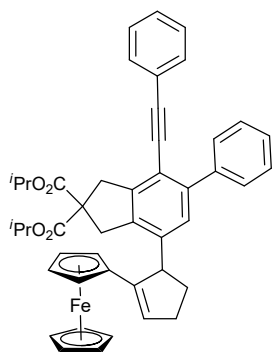

**Diisopropyl 7-(2-ferrocenyl-2-en-1-yl)-5-phenyl-4-(phenylethynyl)-1H-indene-2,2(3H)-dicarboxylate (3x)**

White solid; 587 mg (82 % yield); m. p. 147-151 °C; TLC (petroleum ether/EtOAc = 8:1):  $R_f = 0.83$ ;  $^1\text{H NMR}$  (400 MHz,  $\text{CDCl}_3$ )  $\delta$  7.70 (d,  $J = 7.2$  Hz, 2H), 7.46 (t,  $J = 7.4$  Hz, 2H), 7.40-7.38 (m, 3H), 7.35-7.32 (m, 3H), 7.16 (s, 1H), 5.10-5.04 (m, 2H), 4.13-4.06 (m, 9H), 3.84 (s, 2H), 3.44 (s, 2H), 2.88 (t,  $J = 7.0$  Hz, 3H), 2.73 (t,  $J = 7.0$  Hz, 3H), 2.13-2.06 (m, 2H), 1.28 (d,  $J = 6.0$  Hz, 6H), 1.23 (d,  $J = 6.0$  Hz, 6H);  $^{13}\text{C NMR}$  (101 MHz,  $\text{CDCl}_3$ )  $\delta$  171.3, 143.9, 142.8, 140.5, 131.4, 128.4, 128.1, 127.3, 123.7, 116.1, 95.7, 87.7, 81.5, 69.2, 68.6, 67.5, 59.3, 41.0, 40.1, 39.6, 36.9, 22.9, 21.6. **FT-IR** (KBr):  $\nu = 3083, 3024, 2982, 1724, 1282, 1245, 1106, 814, 696$   $\text{cm}^{-1}$ ; **HRMS** (WATERS):  $m/z$  calcd for  $\text{C}_{46}\text{H}_{44}\text{FeO}_4$   $[\text{M}+\text{H}]^+$  717.2662, found 717.2667.

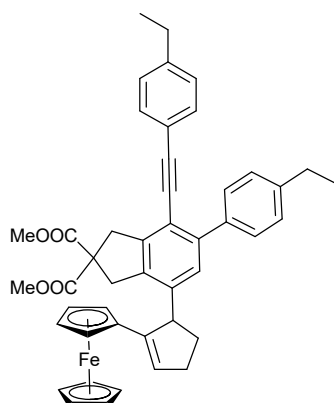

**2-ethyl 2-methyl 5-(4-ethylphenyl)-4-((4-ethylphenyl)ethynyl)-7-(2-ferrocenyl-2-en-1-yl)-1H-indene-2,2(3H)-dicarboxylate (3y)**

White solid; 573 mg (80 % yield); m. p. 90-93 °C; TLC (petroleum ether/EtOAc = 8:1):  $R_f = 0.53$ ;  $^1\text{H NMR}$  (400 MHz,  $\text{CDCl}_3$ )  $\delta$  7.51 (d,  $J = 8.0$  Hz, 2H), 7.31 (d,  $J = 8.0$  Hz, 2H), 7.23 (d,  $J = 8.0$  Hz, 2H), 7.15 (d,  $J = 8.0$  Hz, 2H), 7.02 (s, 1H), 6.04 (s, 1H), 4.44 (s, 1H), 4.22-4.18 (m, 2H), 4.09-4.06 (m, 7H), 3.90-3.88 (m, 2H), 3.86-3.83 (m, 6H), 3.76-3.67 (m, 2H), 2.73-2.63 (m, 4H), 2.58-2.51 (m, 2H), 2.47-2.40 (m, 1H), 1.92-1.86 (m, 1H), 1.31-1.23 (m, 6H);  $^{13}\text{C NMR}$  (101 MHz,  $\text{CDCl}_3$ )  $\delta$  172.3, 172.1, 144.5, 143.4, 143.2, 142.9, 142.1, 141.7, 136.4, 131.4, 125.8, 120.9, 115.7, 95.6, 86.9, 69.3, 67.7, 67.5, 66.0, 59.2, 53.1, 41.2, 39.6, 33.7, 31.8, 28.9, 28.6, 15.6, 15.4. **FT-IR** (KBr):  $\nu = 3087, 2958, 1737, 1436, 1276,$

1245, 1198, 1162, 1068, 830  $\text{cm}^{-1}$ ; **HRMS** (WATERS):  $m/z$  calcd for  $\text{C}_{46}\text{H}_{44}\text{FeO}_4$   $[\text{M}+\text{H}]^+$  717.2667, found 717.2663.

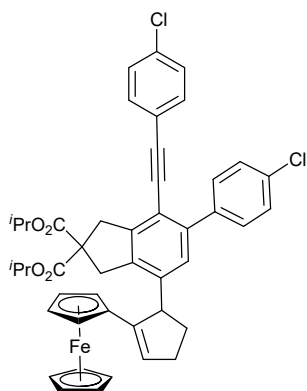

**diisopropyl 5-(4-chlorophenyl)-4-((4-chlorophenyl)ethynyl)-7-(2-ferrocenyl-2-en-1-yl)-1H-indene-2,2(3H)-dicarboxylate (3z)**

White solid; 667 mg (85 % yield); m. p. 100-102  $^{\circ}\text{C}$ ; TLC (petroleum ether/EtOAc = 8:1):  $R_f$  = 0.76;  **$^1\text{H}$  NMR** (400 MHz,  $\text{CDCl}_3$ )  $\delta$  7.59 (d,  $J$  = 8.4 Hz, 2H), 7.40 (d,  $J$  = 8.4 Hz, 2H), 7.32 (s, 4H), 7.09 (s, 1H), 5.08-5.02 (m, 2H), 4.11-4.08 (m, 7H), 4.01 (s, 2H), 3.80 (s, 2H), 3.42 (s, 2H), 2.87 (t,  $J$  = 7.2 Hz, 2H), 2.70 (t,  $J$  = 7.2 Hz, 2H), 2.13-2.05 (m, 2H), 1.45 (s, 2H), 1.26 (d,  $J$  = 6.4 Hz, 6H), 1.22 (d,  $J$  = 6.4 Hz, 6H);  **$^{13}\text{C}$  NMR** (101 MHz,  $\text{CDCl}_3$ )  $\delta$  171.2, 137.3, 136.3, 134.2, 133.6, 133.3, 132.6, 130.7, 128.7, 128.3, 128.0, 115.6, 94.8, 88.2, 81.3, 69.3, 69.1, 68.6, 67.4, 59.3, 39.5, 27.0, 25.3, 22.9, 22.7, 21.7, 20.7, 20.5, 19.5, 18.8, 14.4, 14.2, 11.5. **FT-IR** (KBr):  $\nu$  = 3091, 2928, 2848, 1725, 1277, 1250, 1196, 1168, 1100, 885  $\text{cm}^{-1}$ ; **HRMS** (WATERS):  $m/z$  calcd for  $\text{C}_{46}\text{H}_{42}\text{Cl}_2\text{FeO}_4$   $[\text{M}+\text{H}]^+$  785.1888, found 785.1882.

#### 4. X-Ray Structure for 3a, 3b, 3c, 3t.

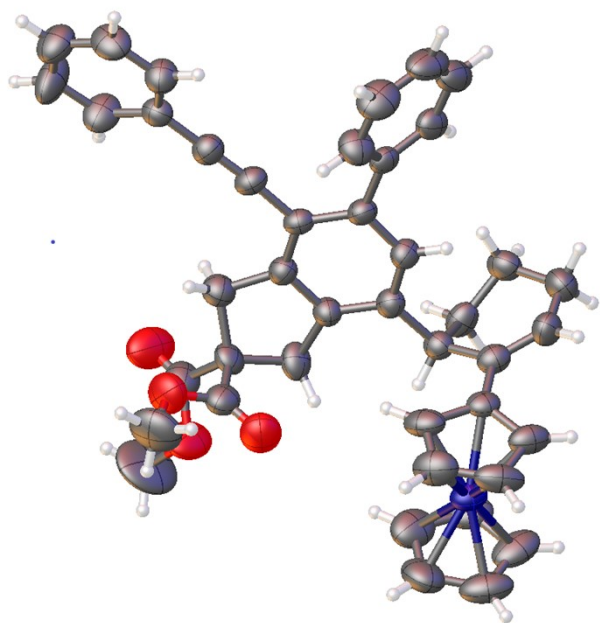

**3a**

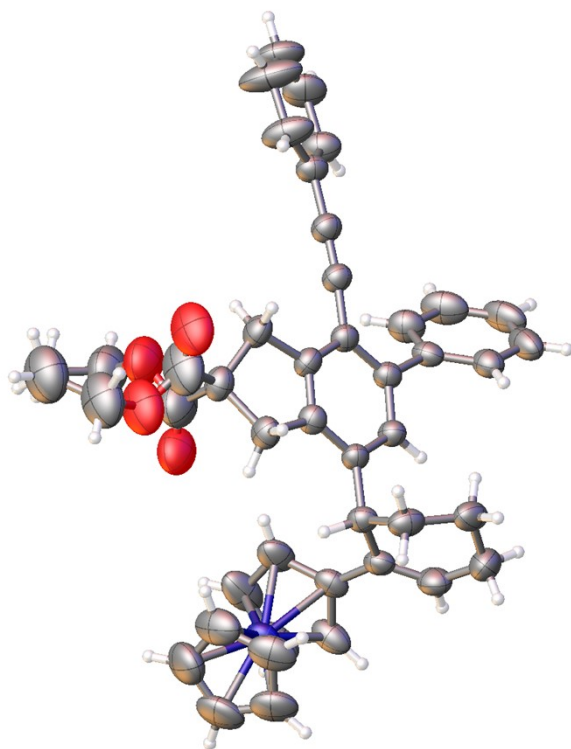

**3b**

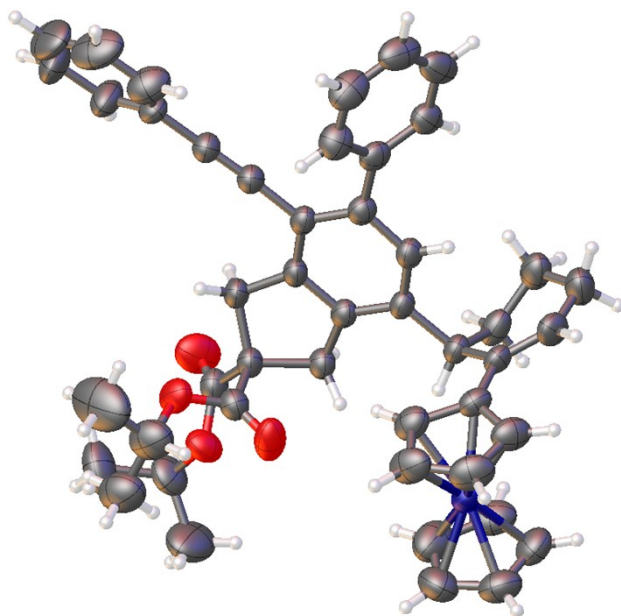

3c

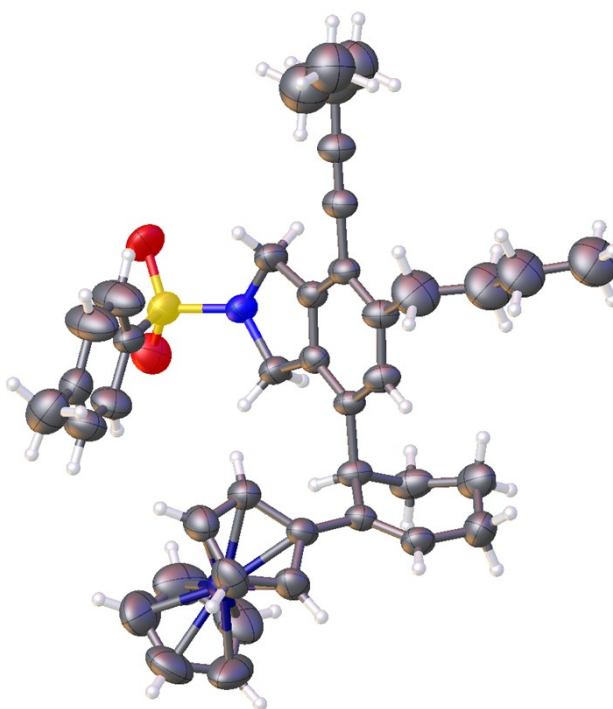

3t

## 5. $^1\text{H}$ NMR & $^{13}\text{C}$ NMR Spectra for New Compounds

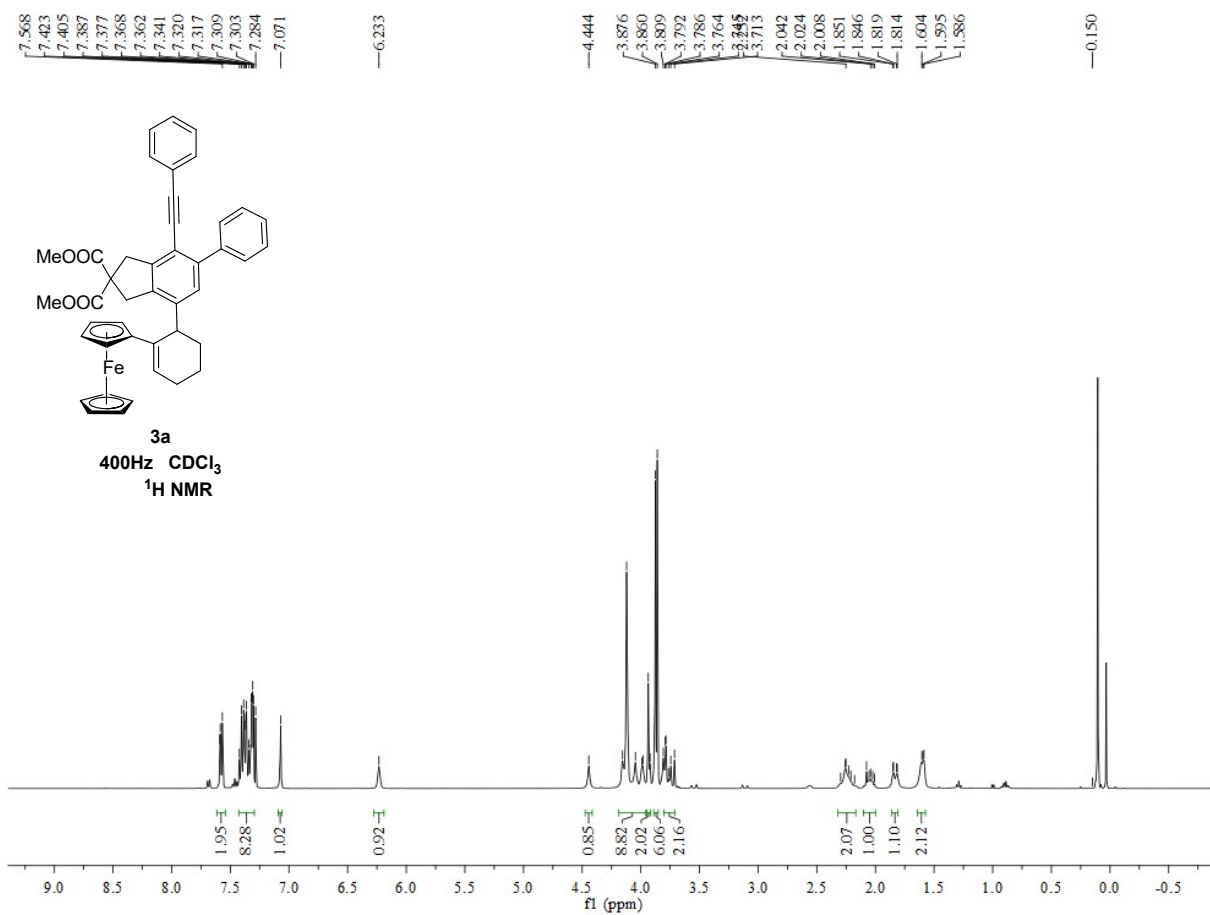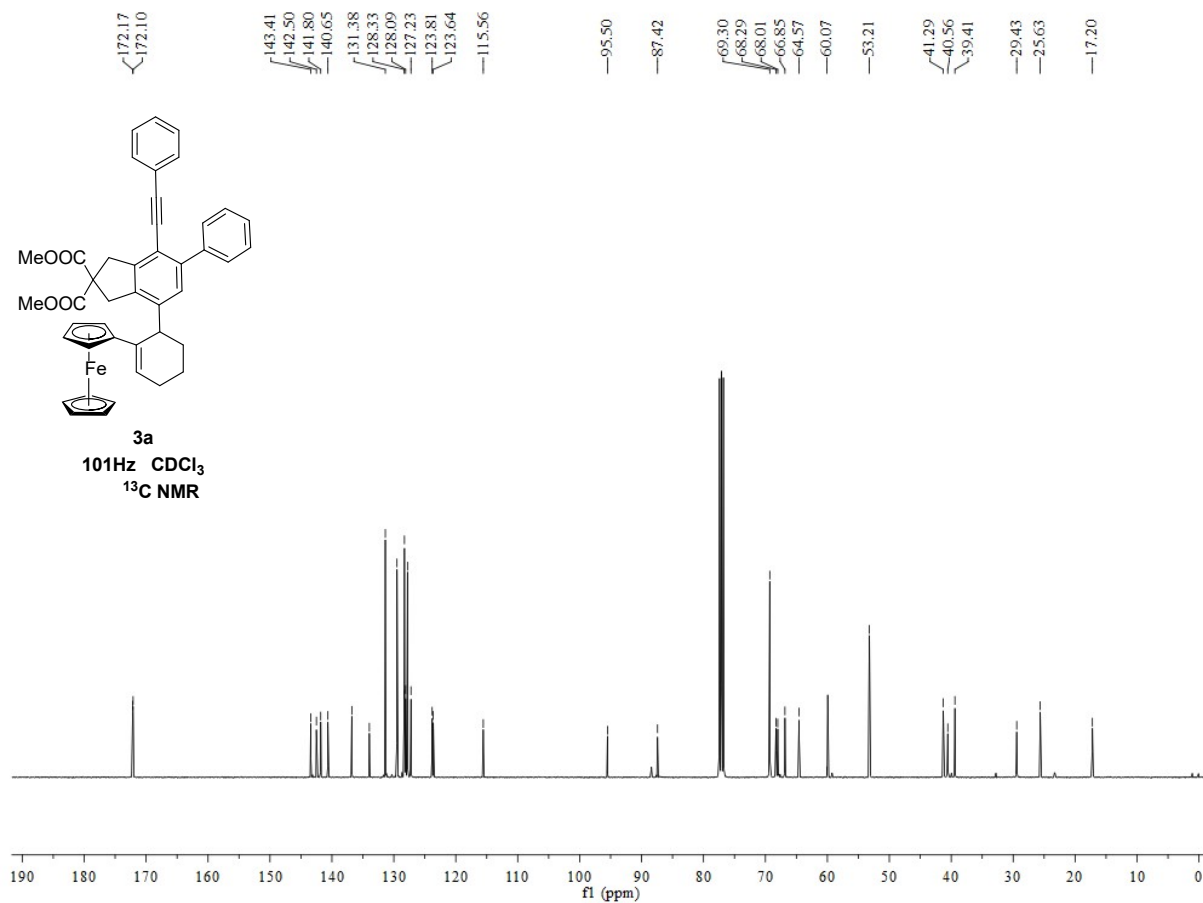

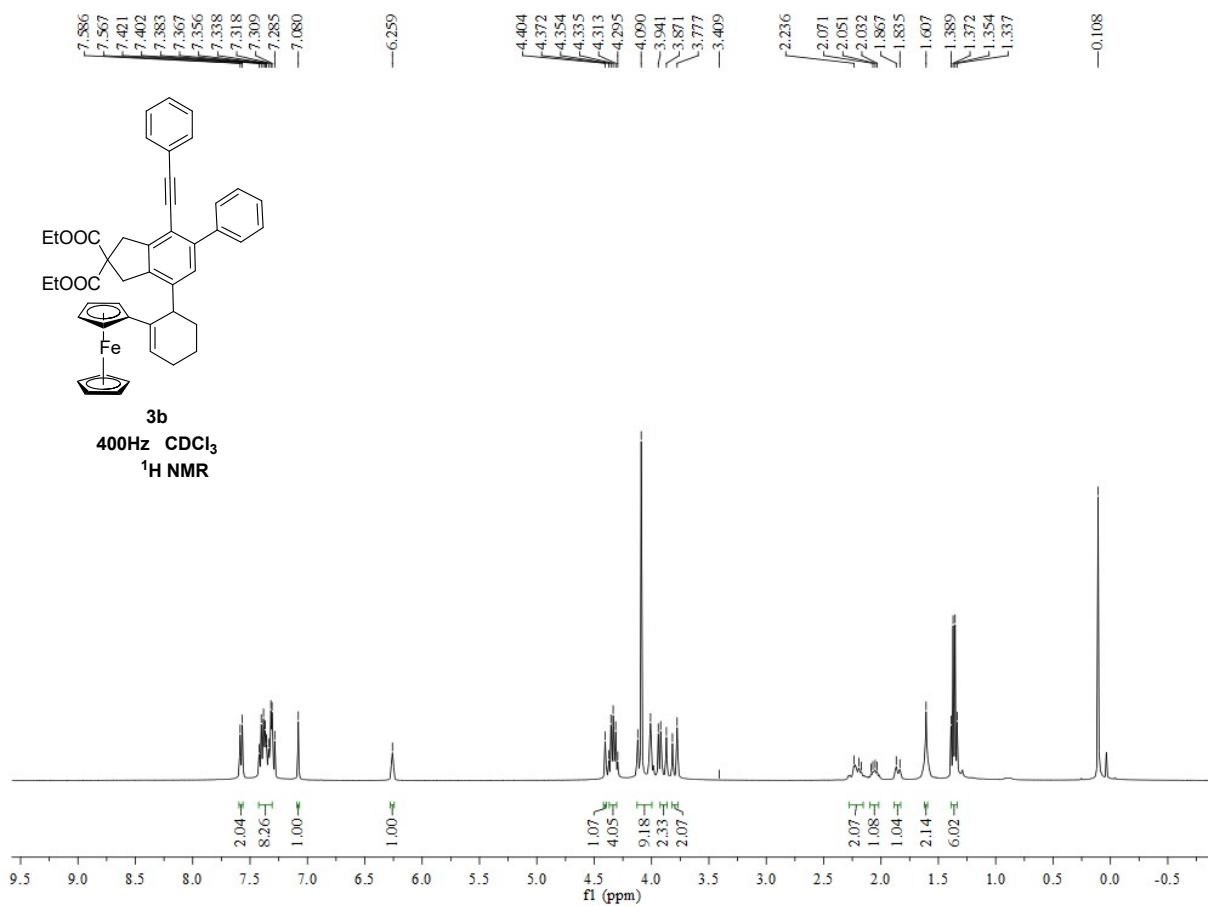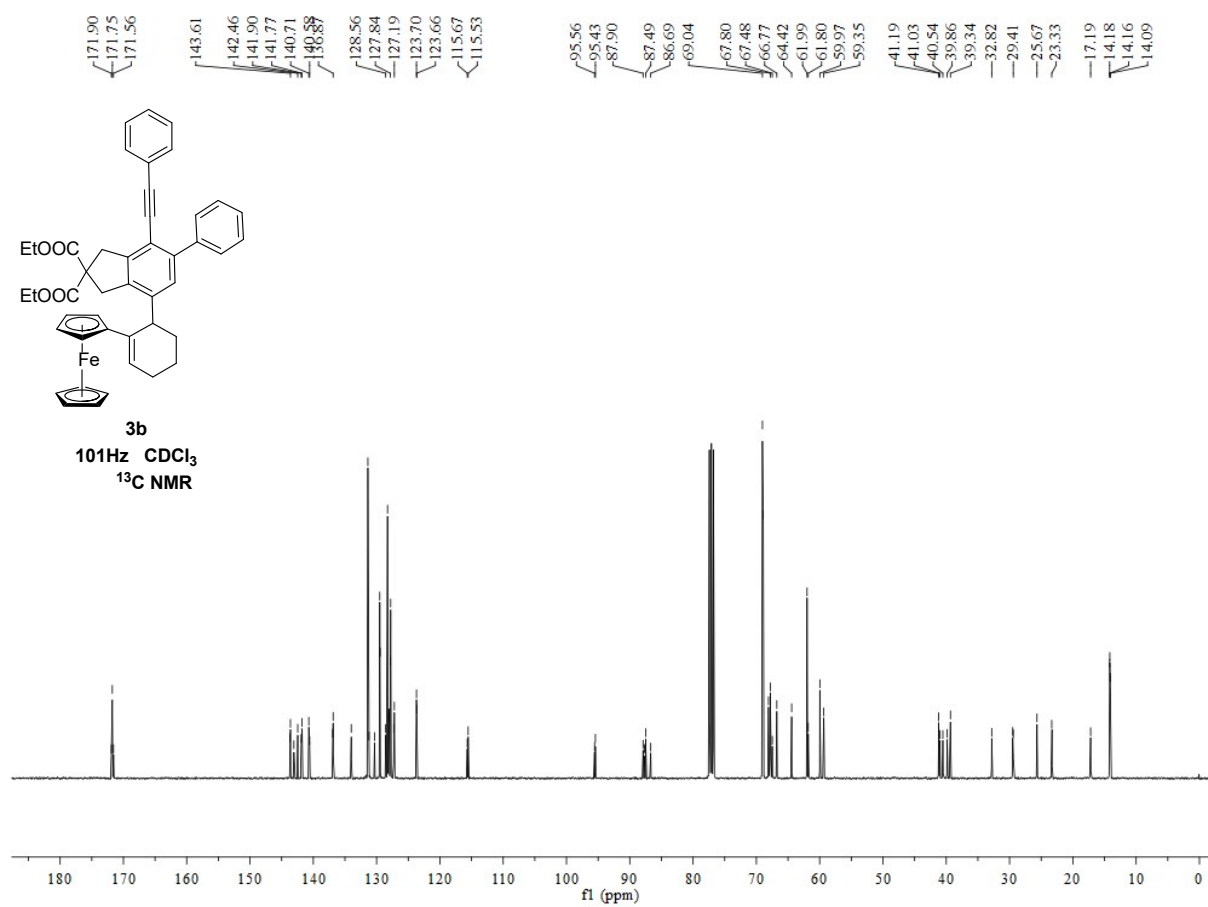

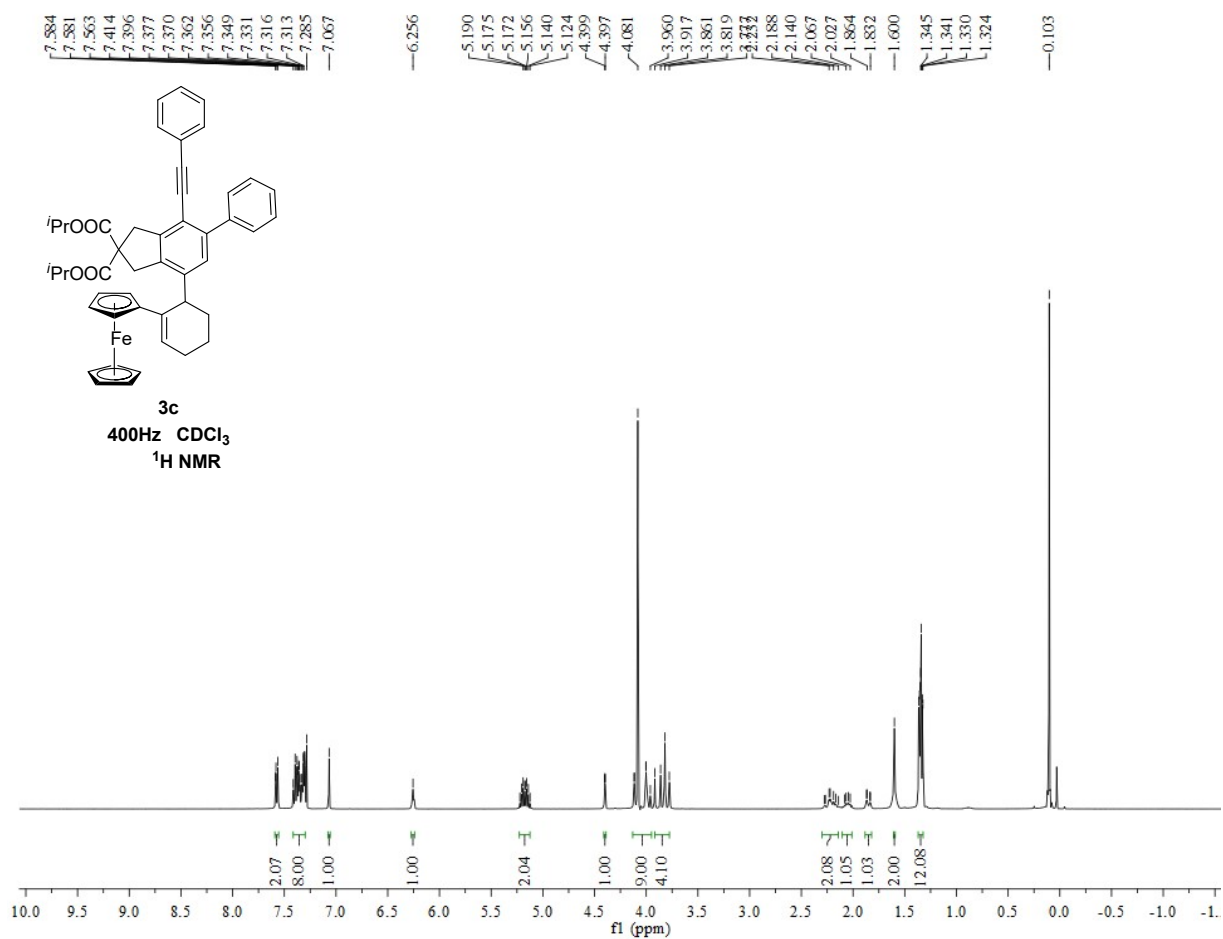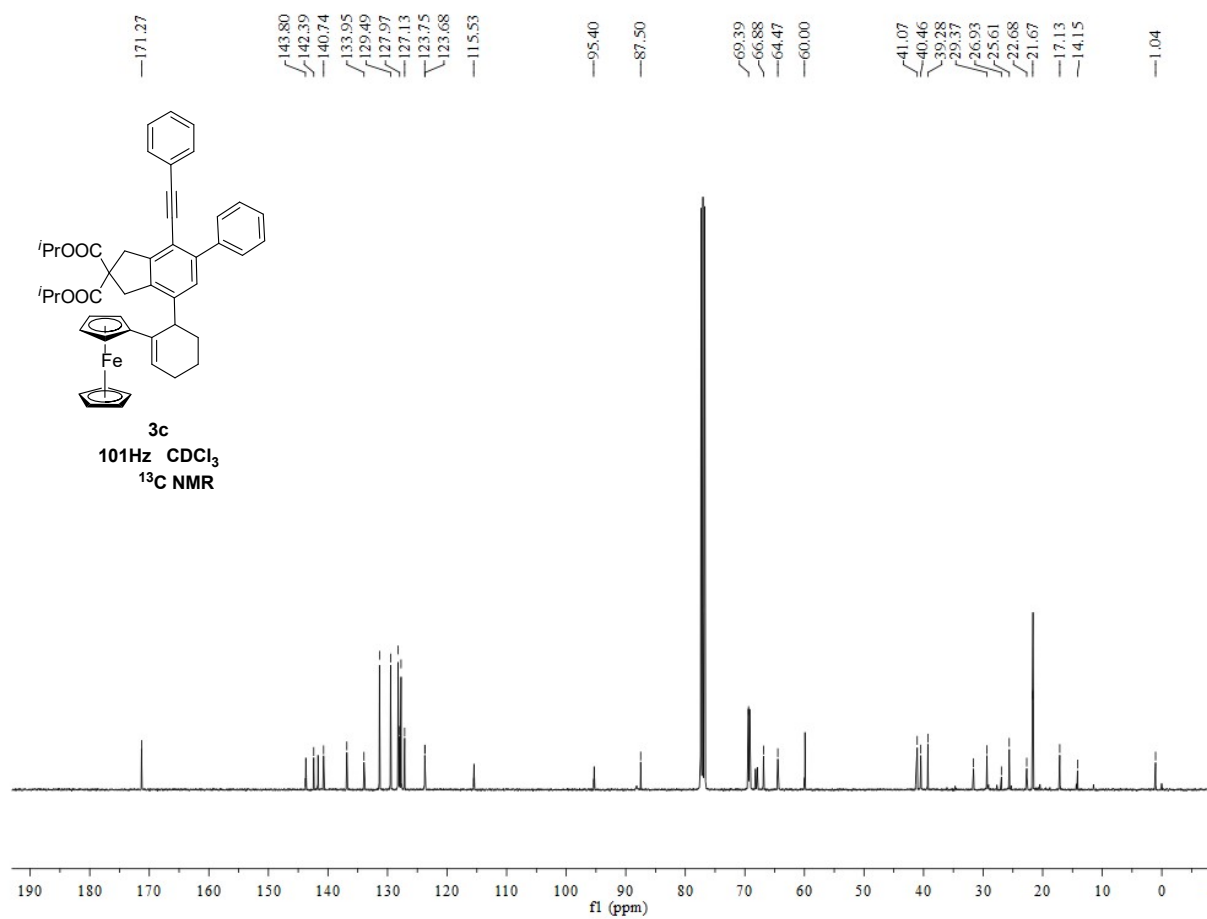

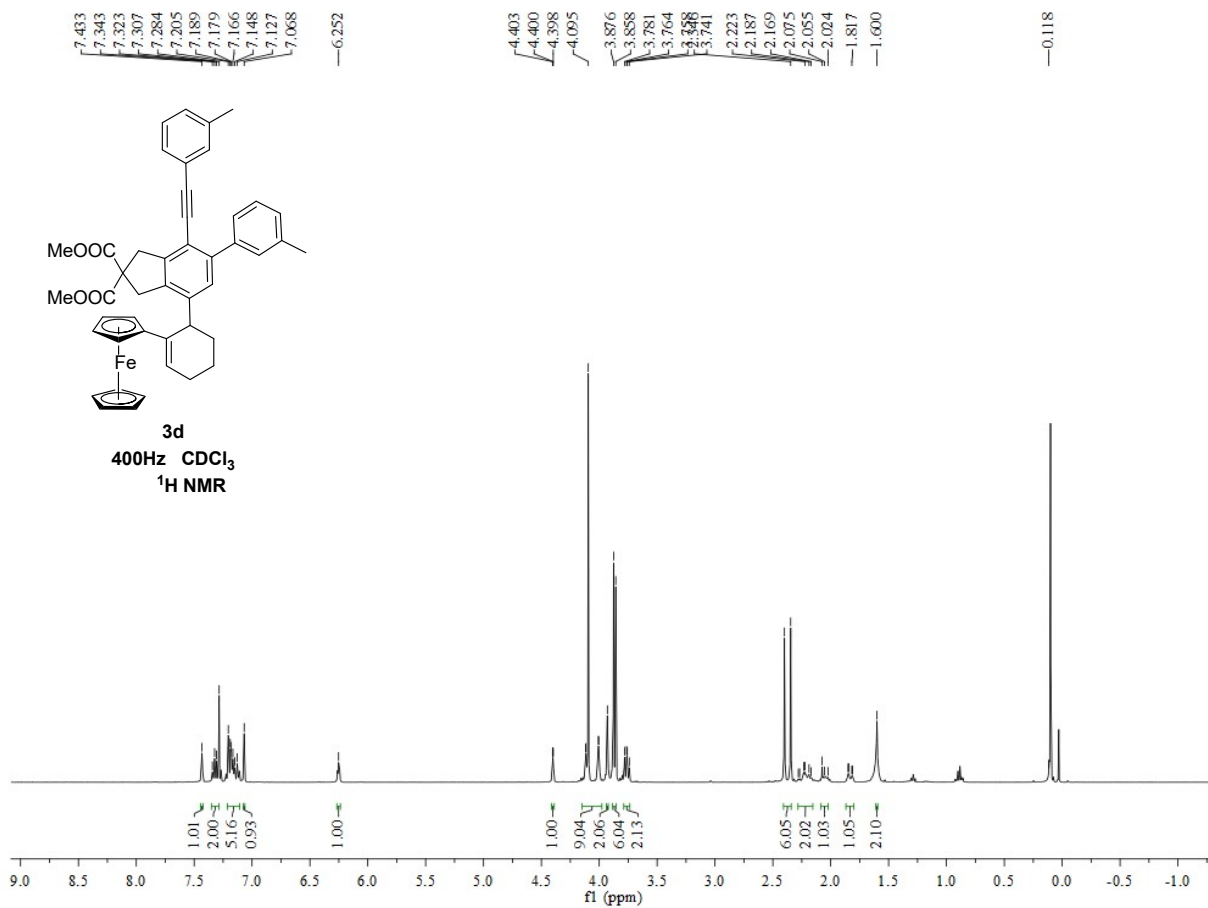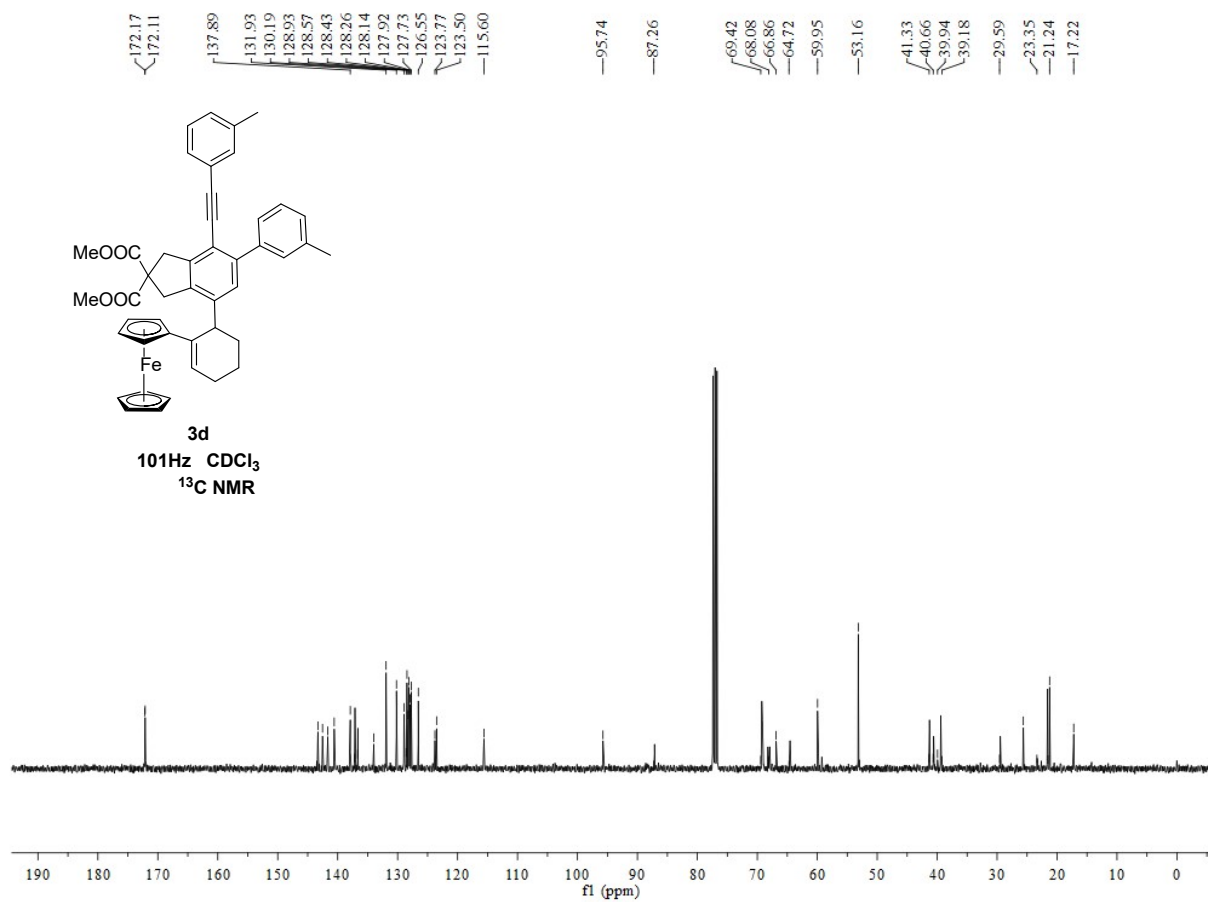



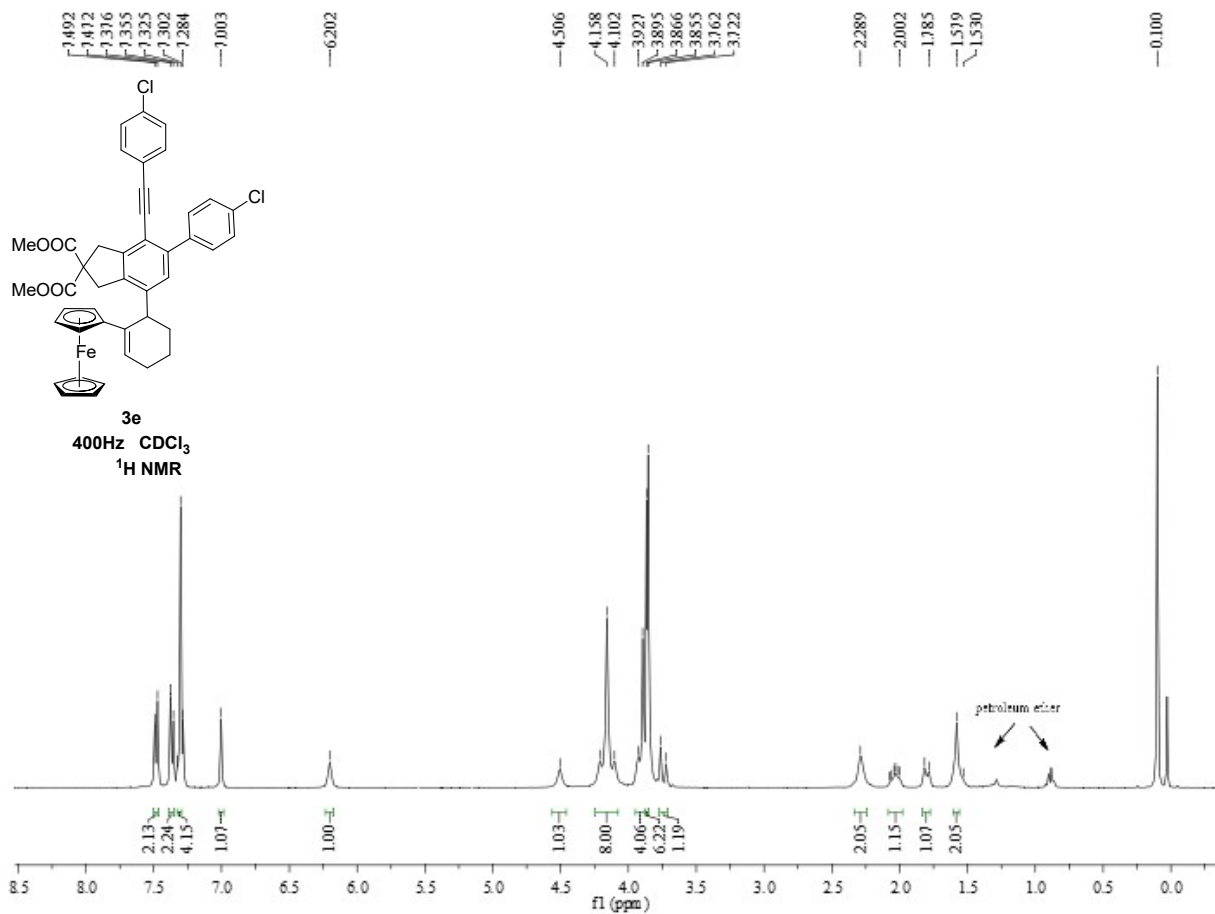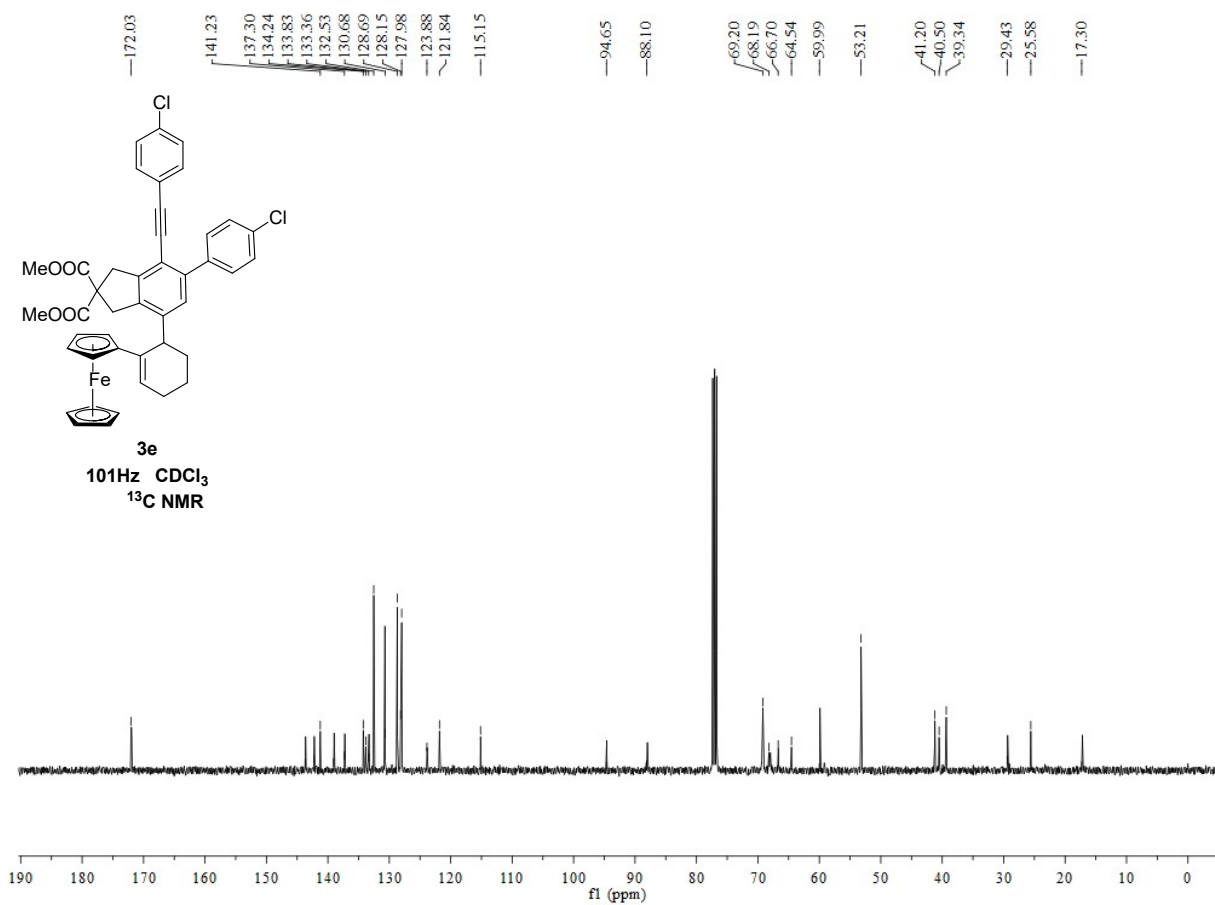

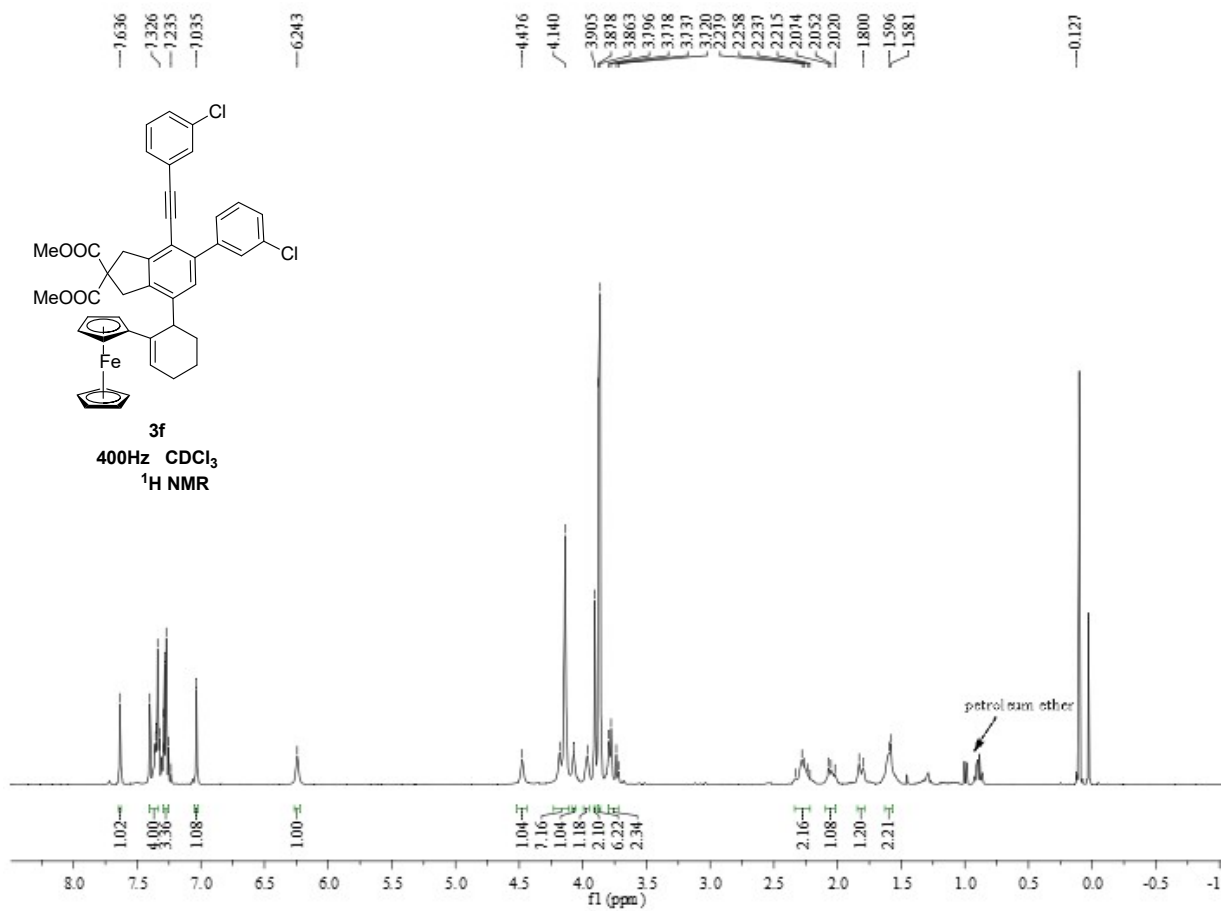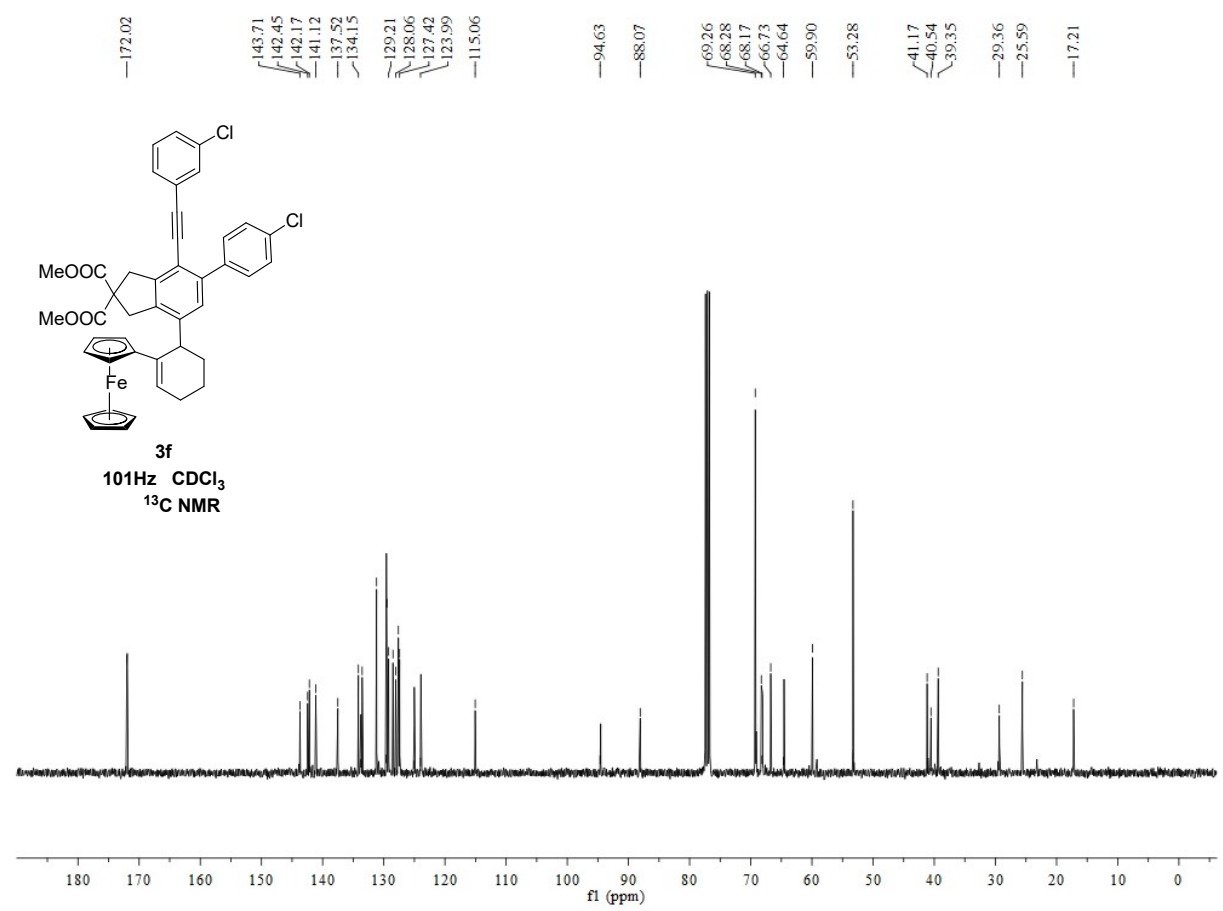

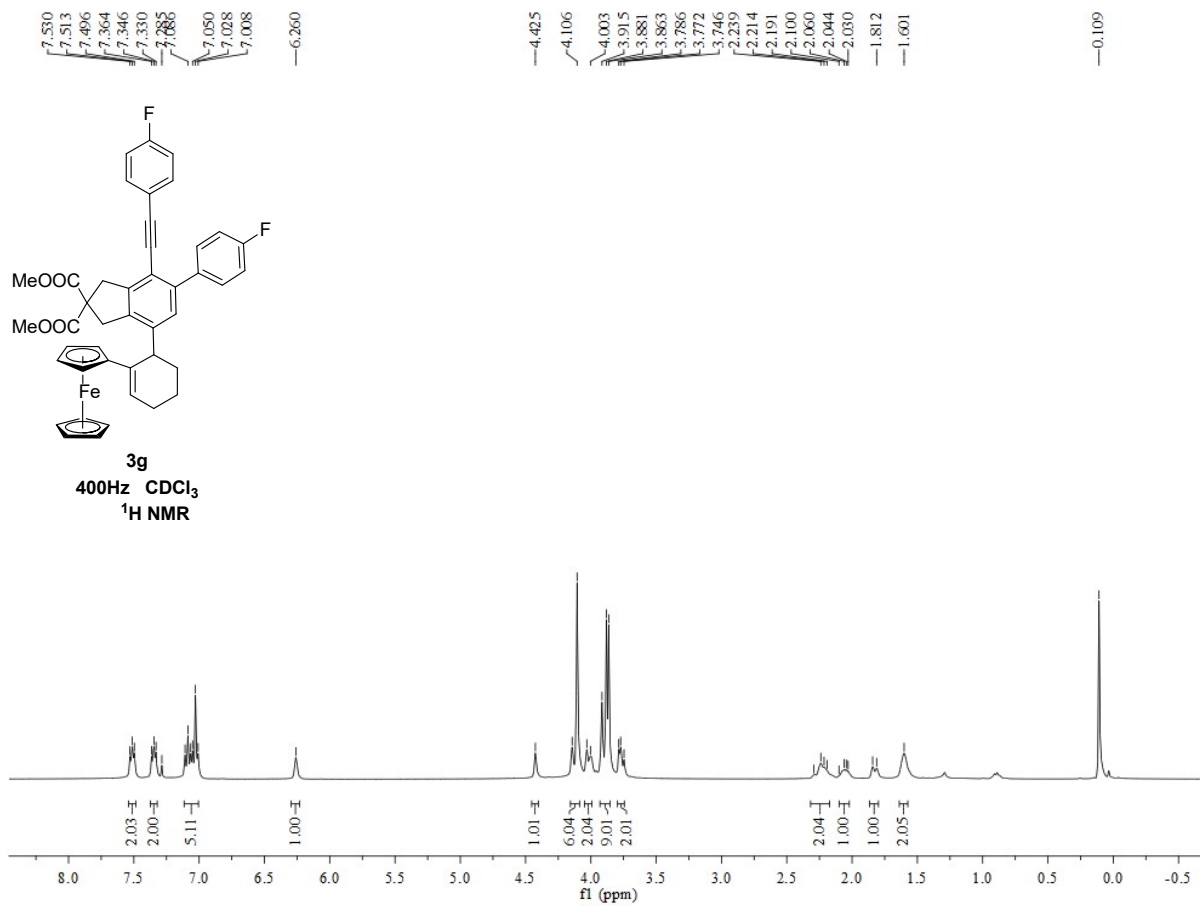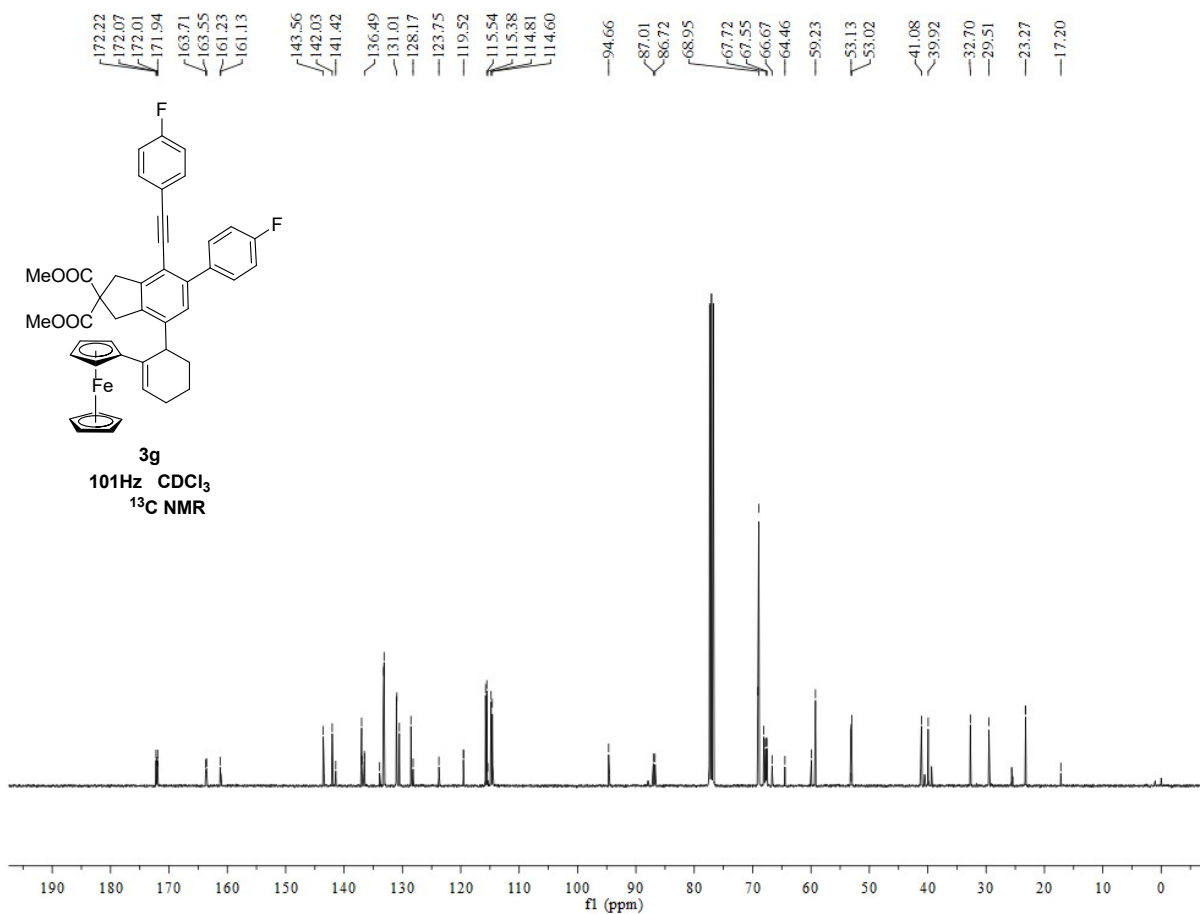

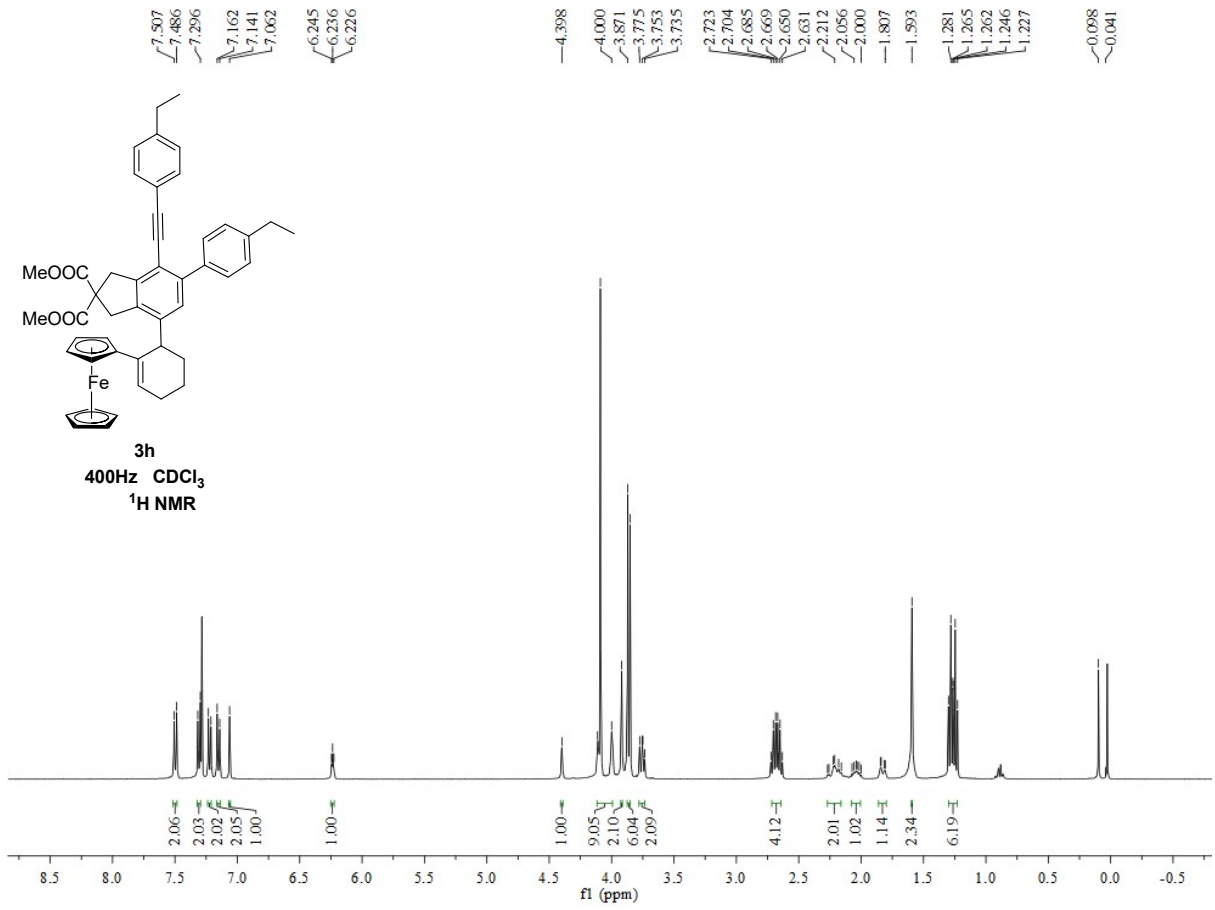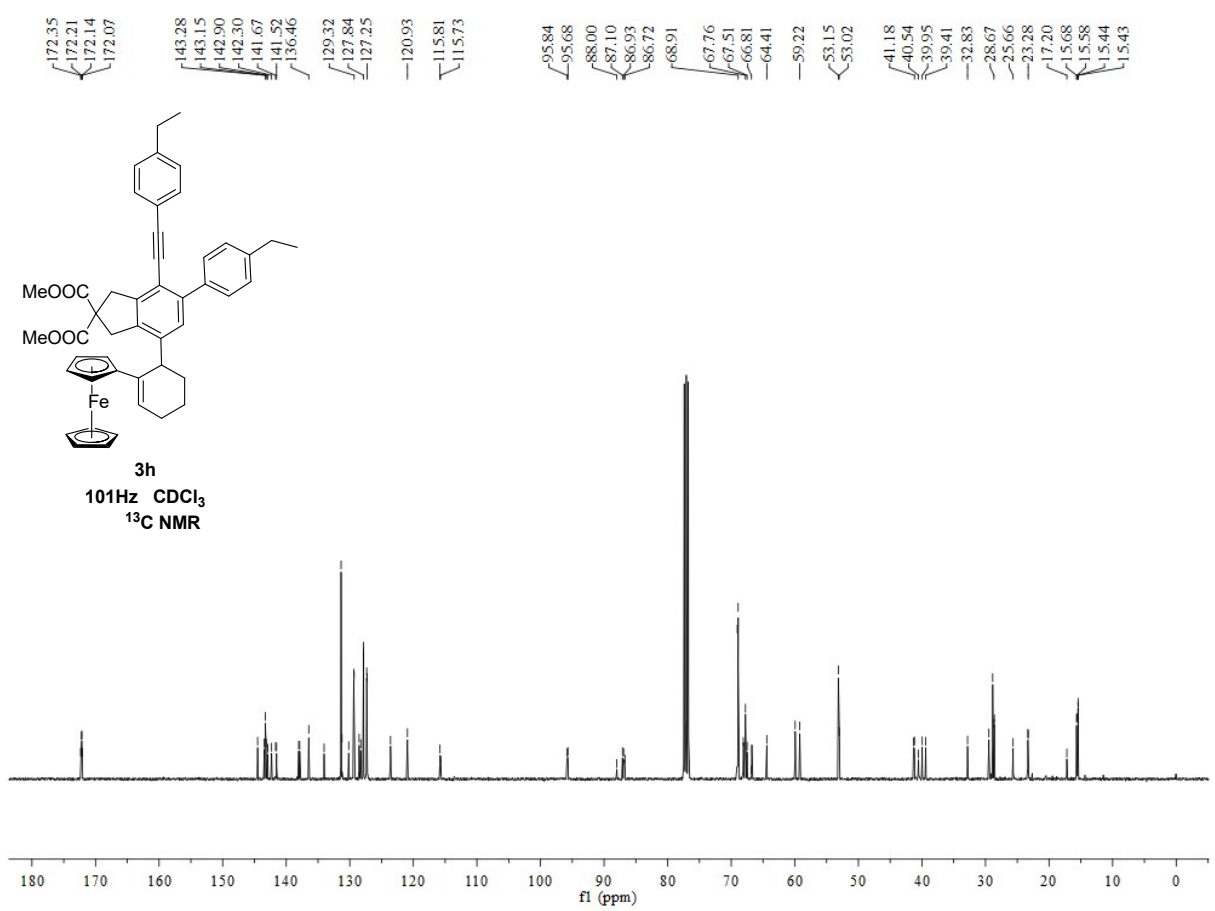

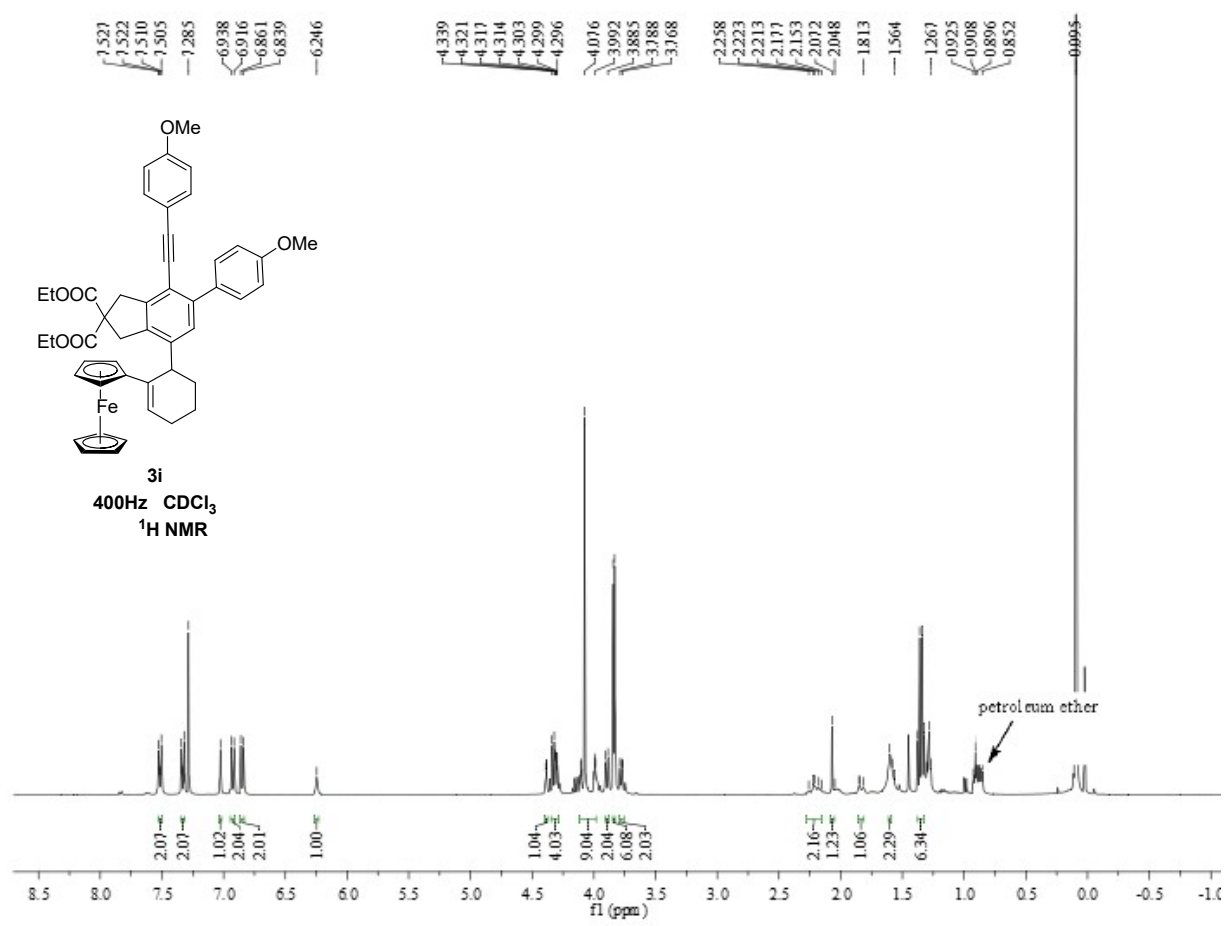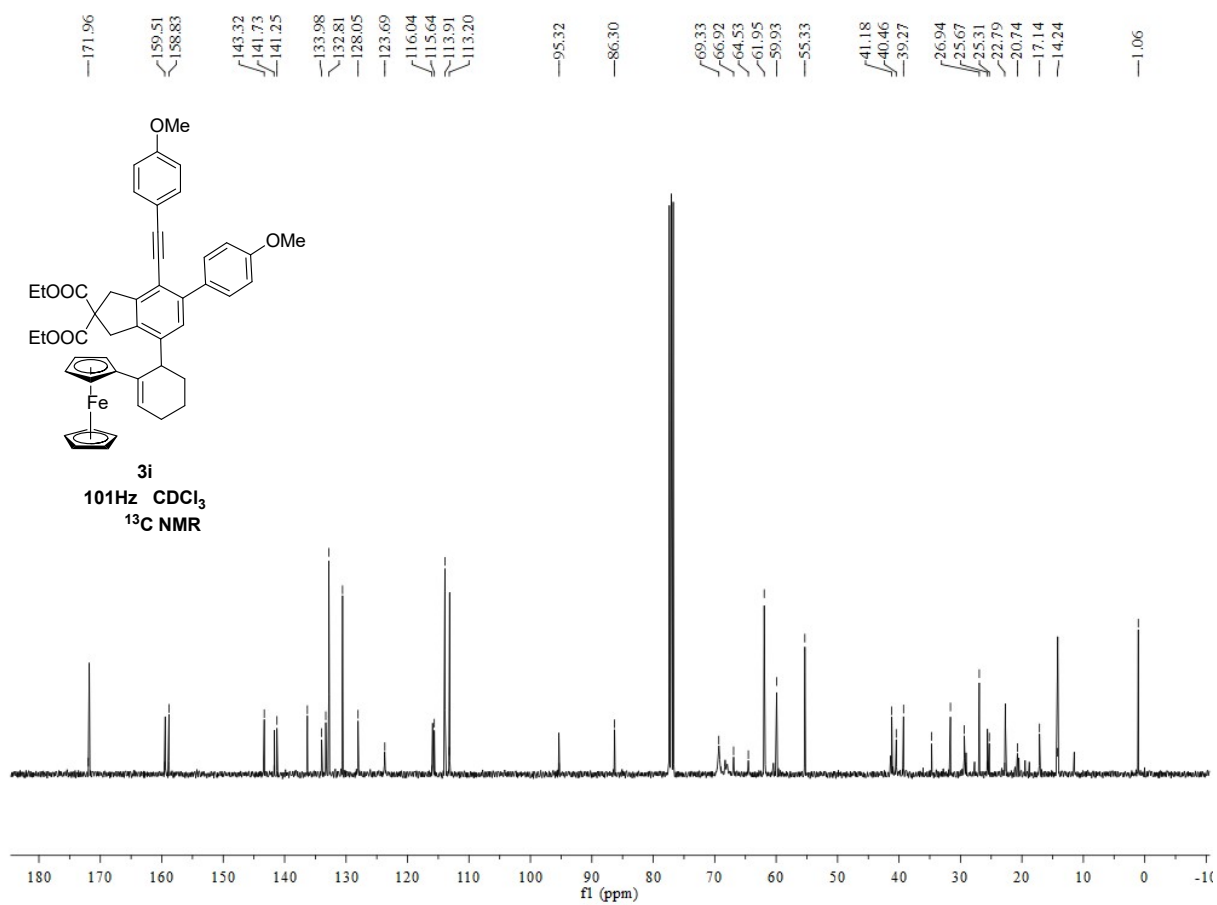

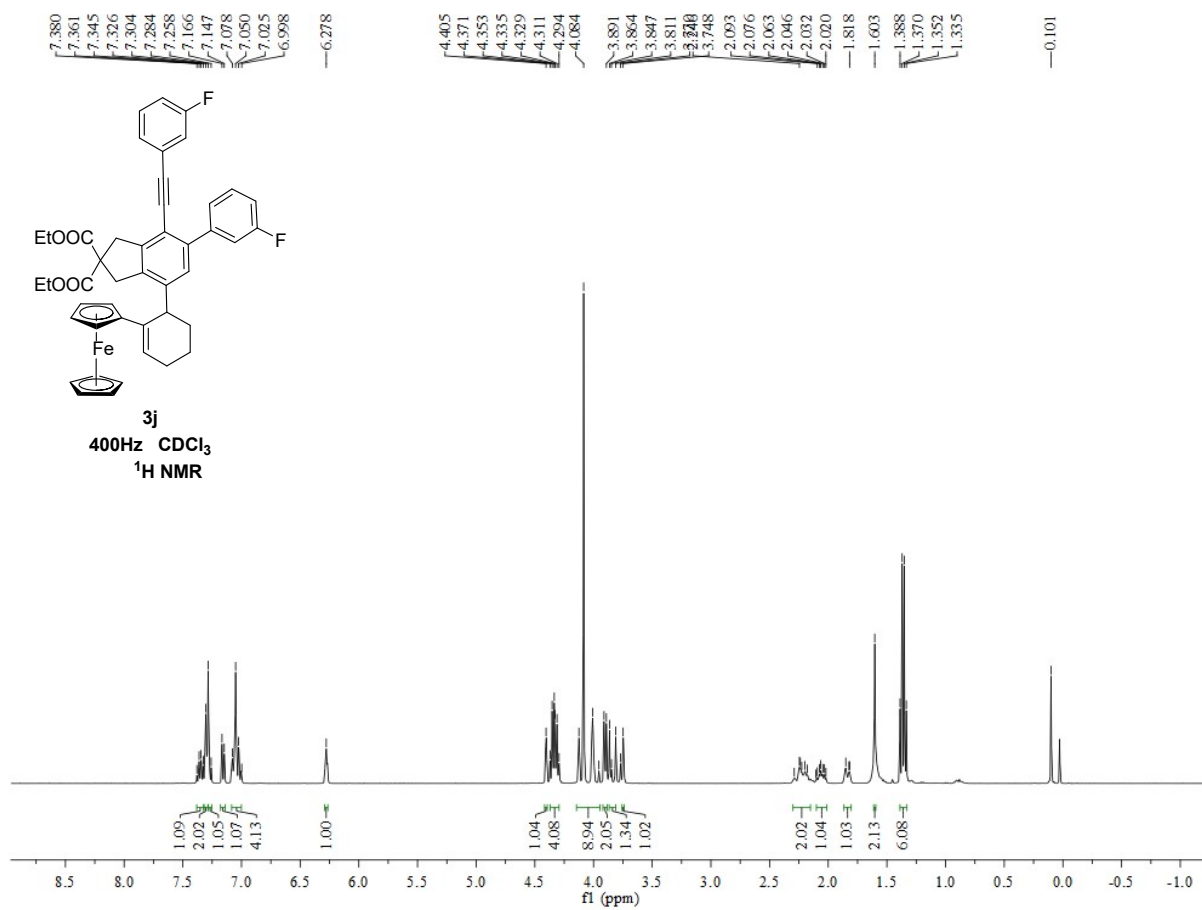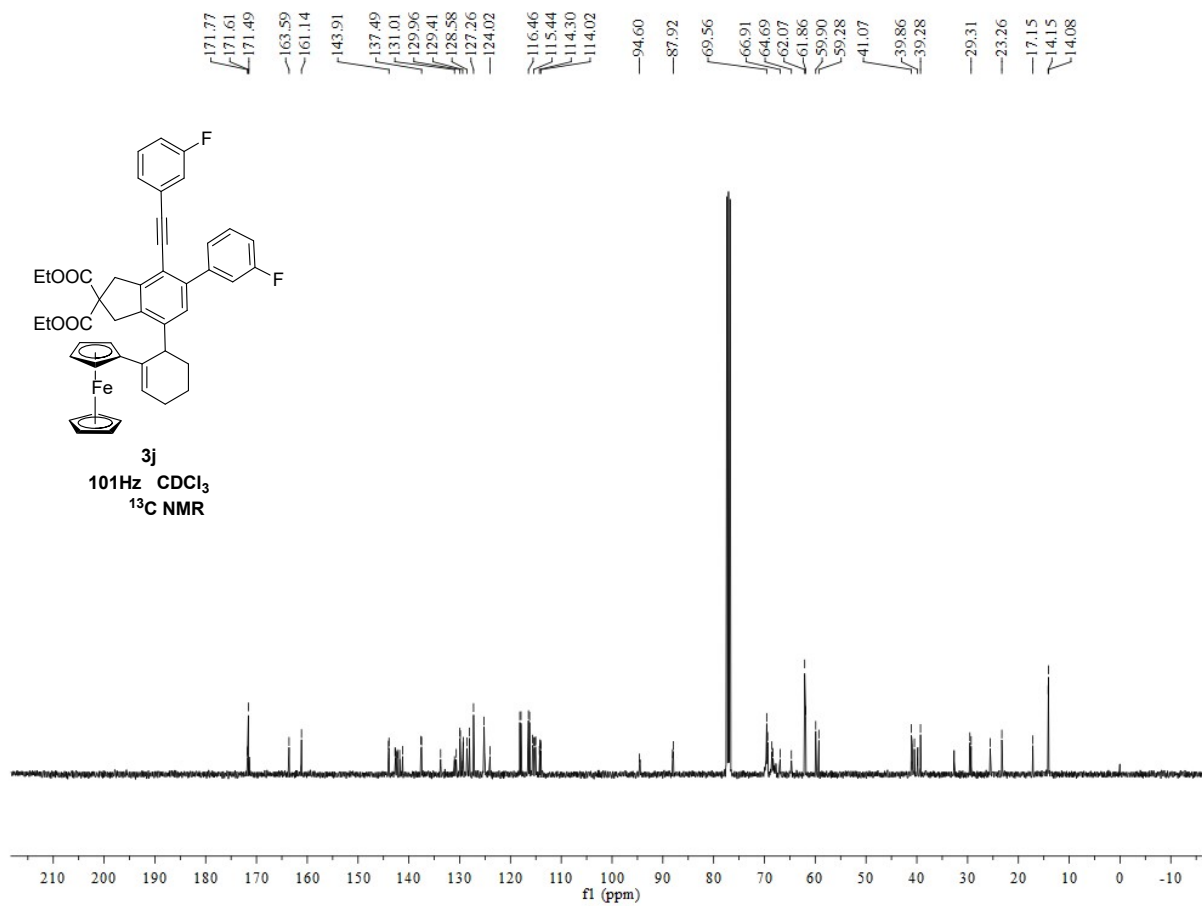

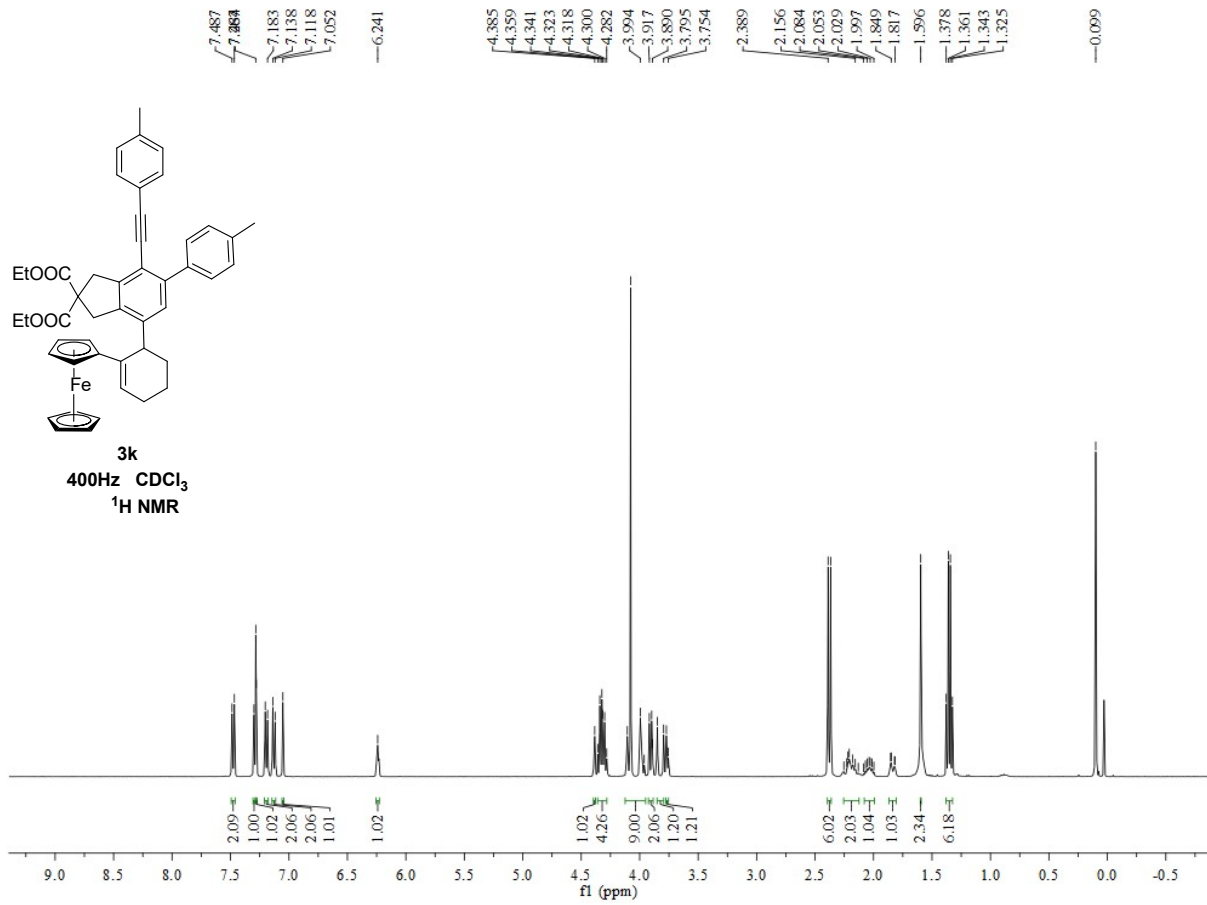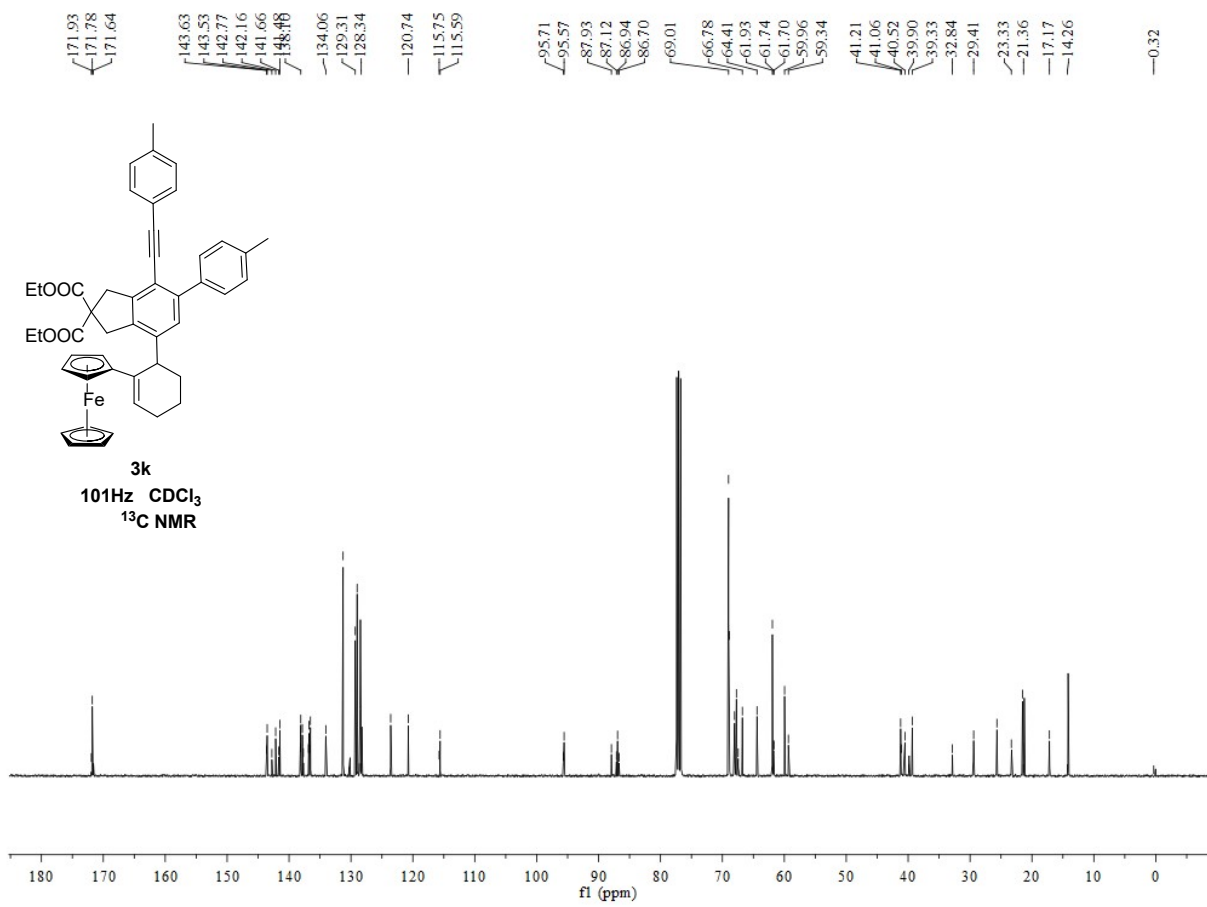

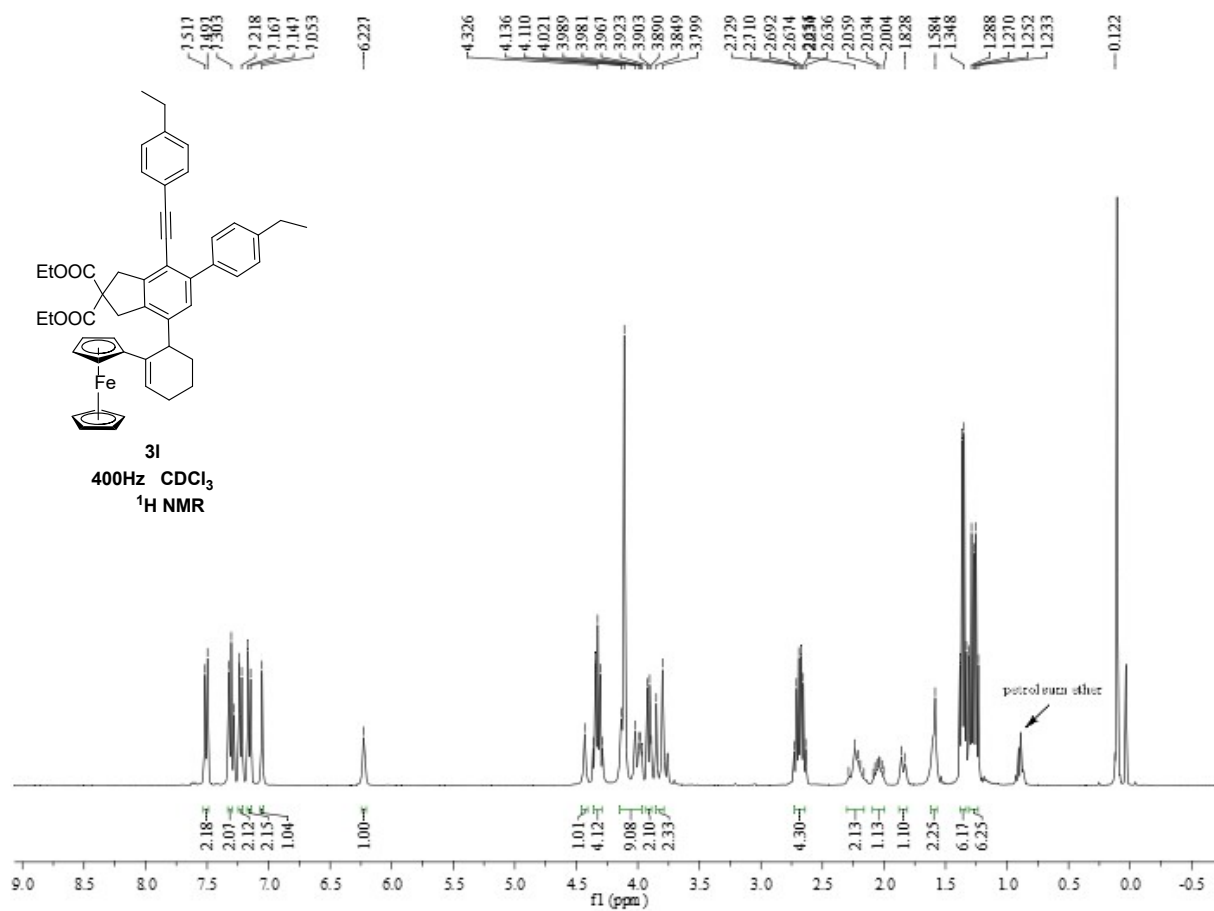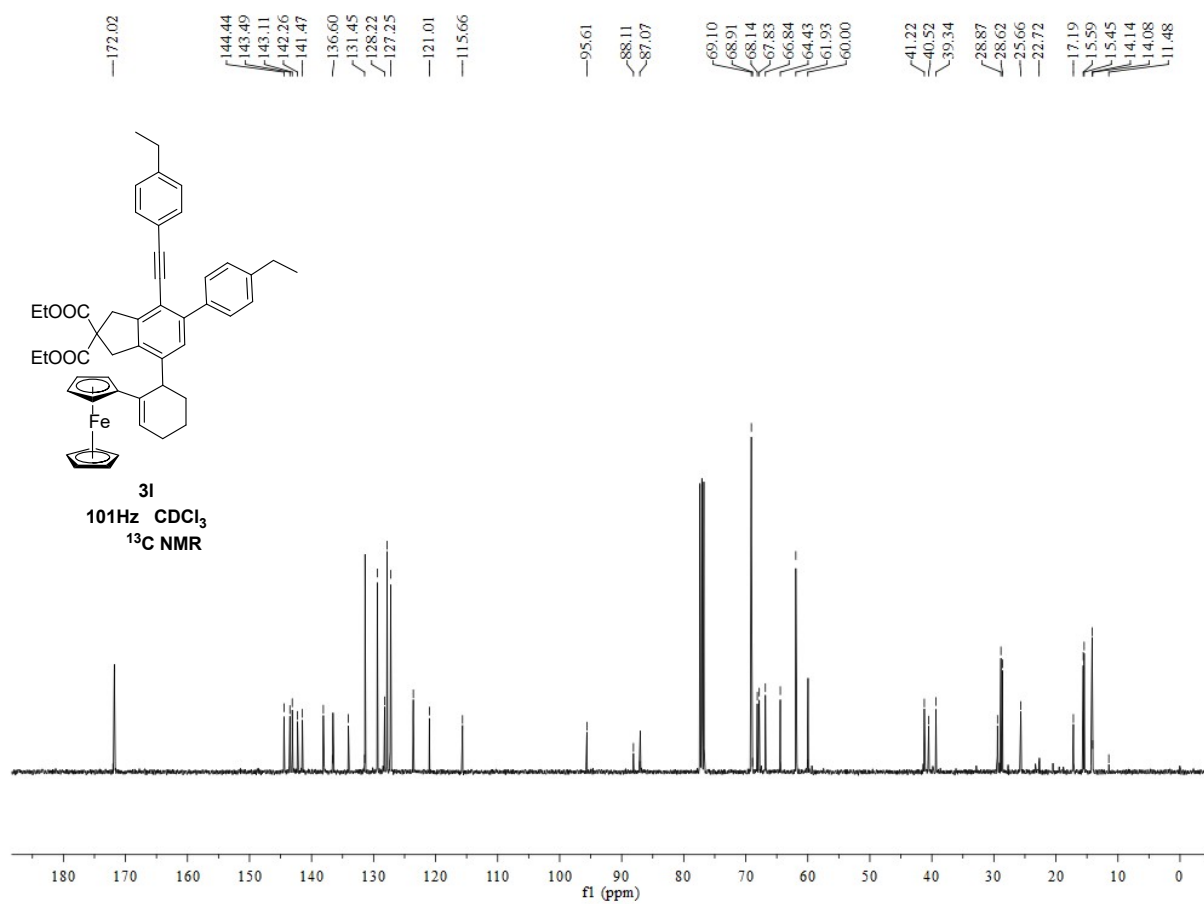



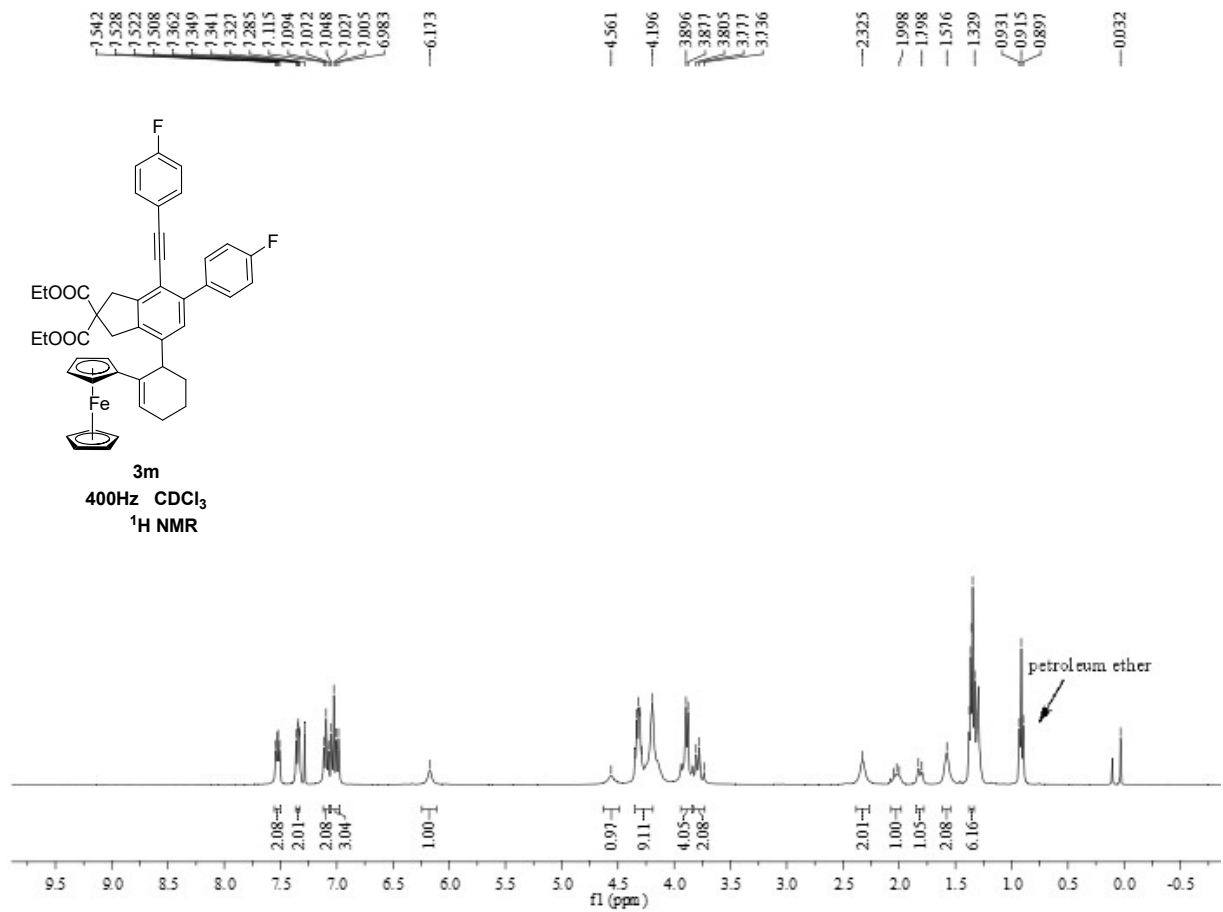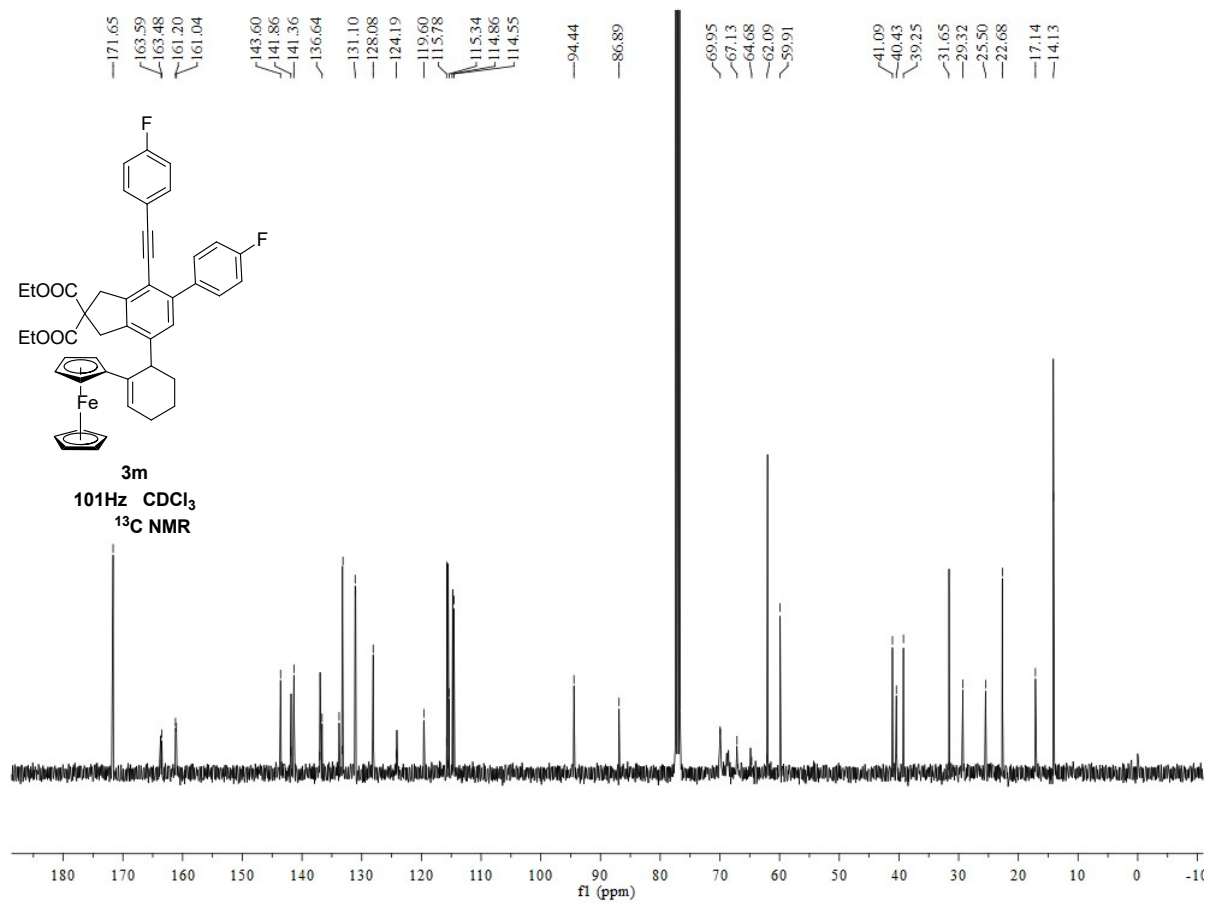

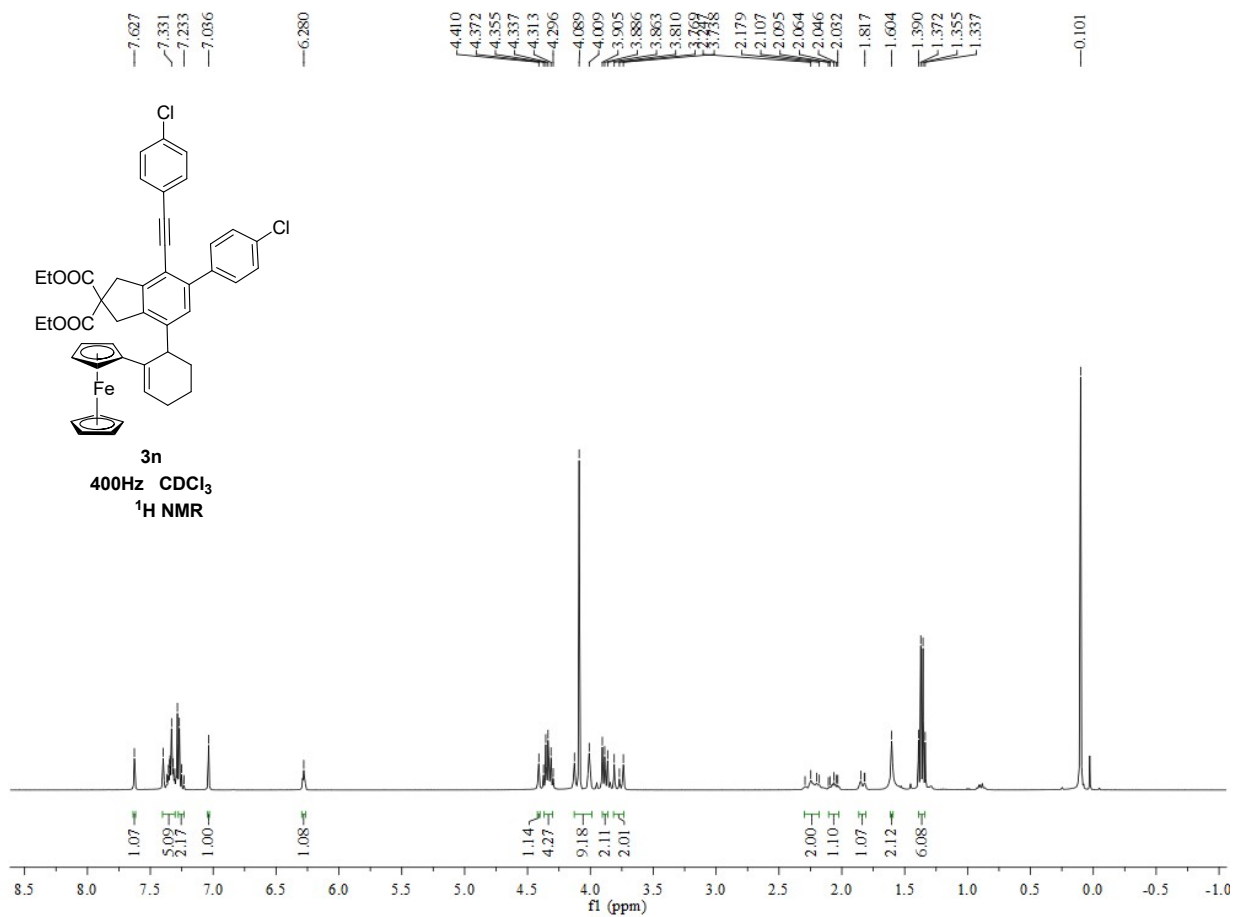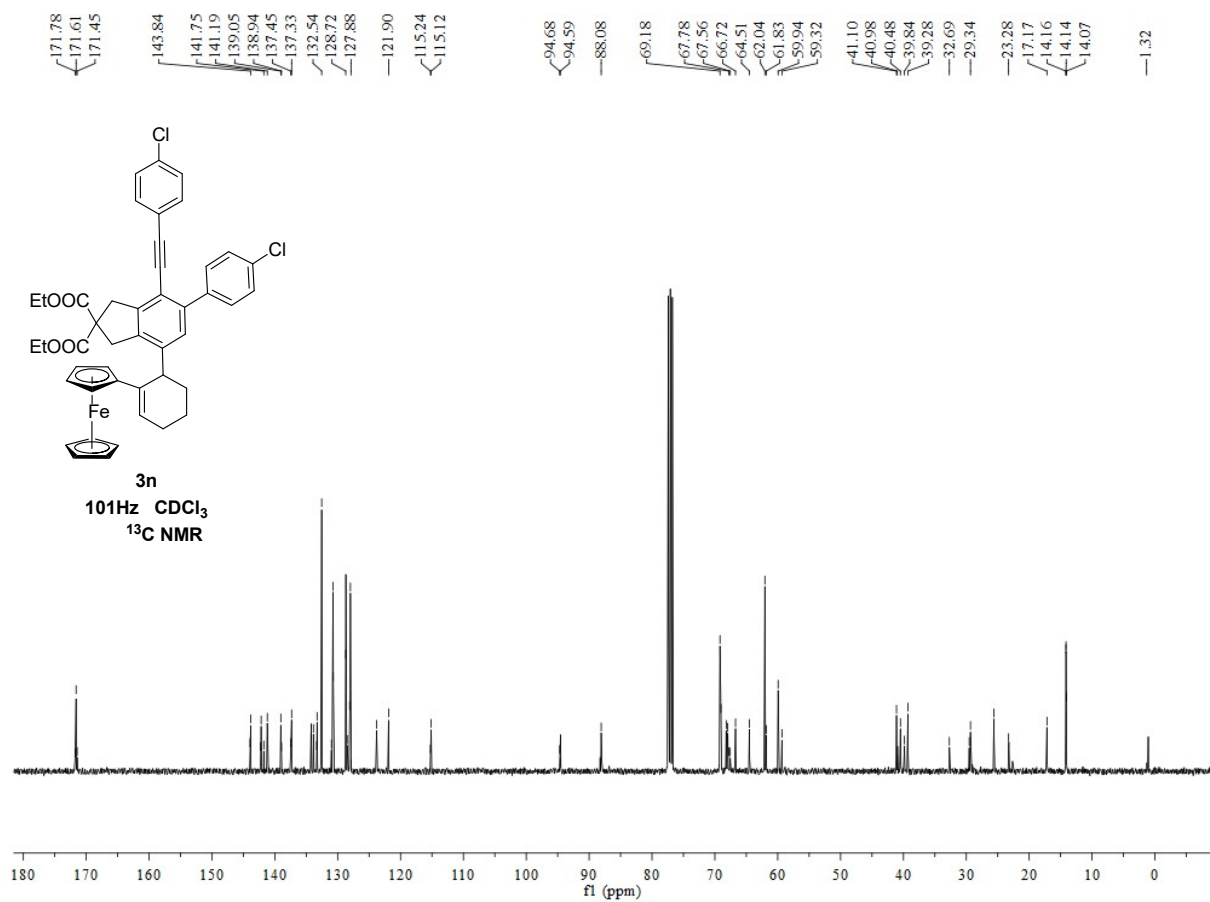

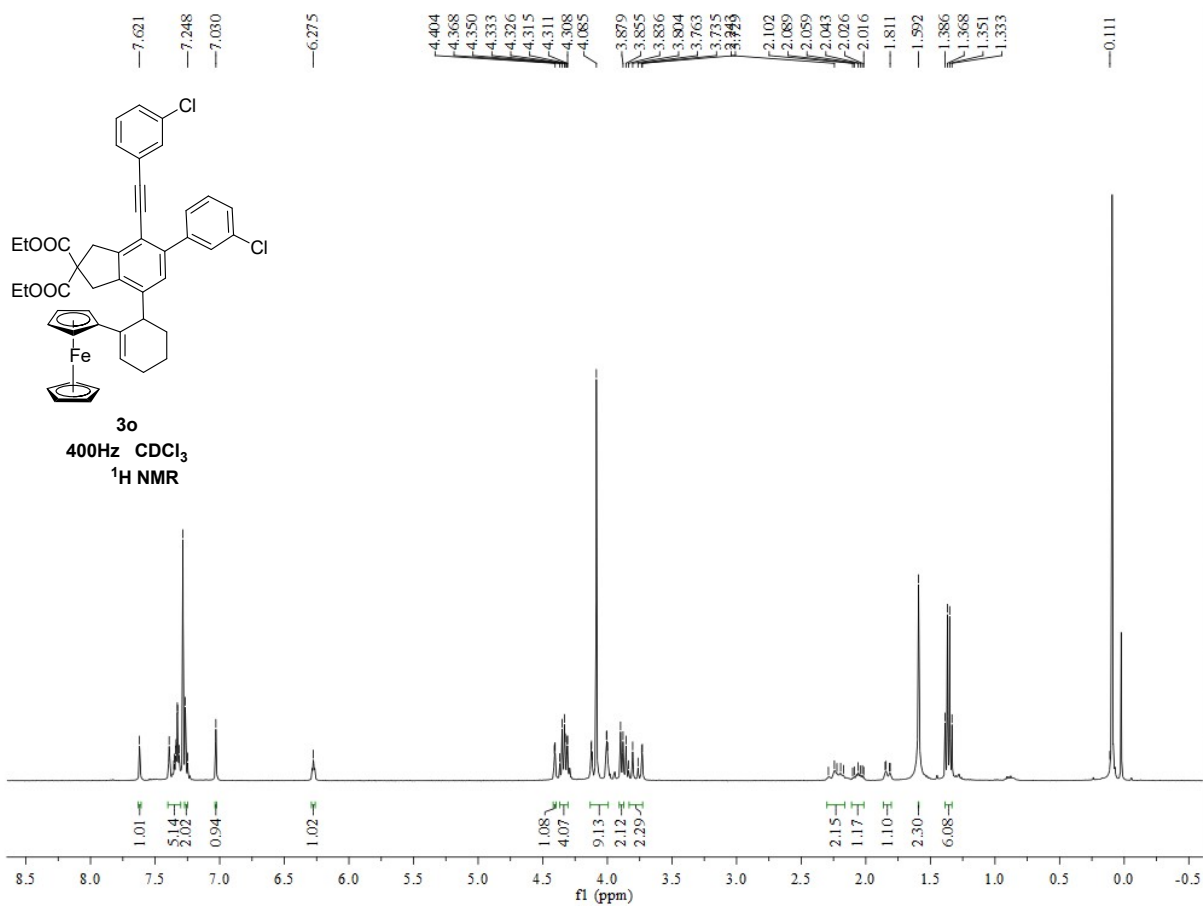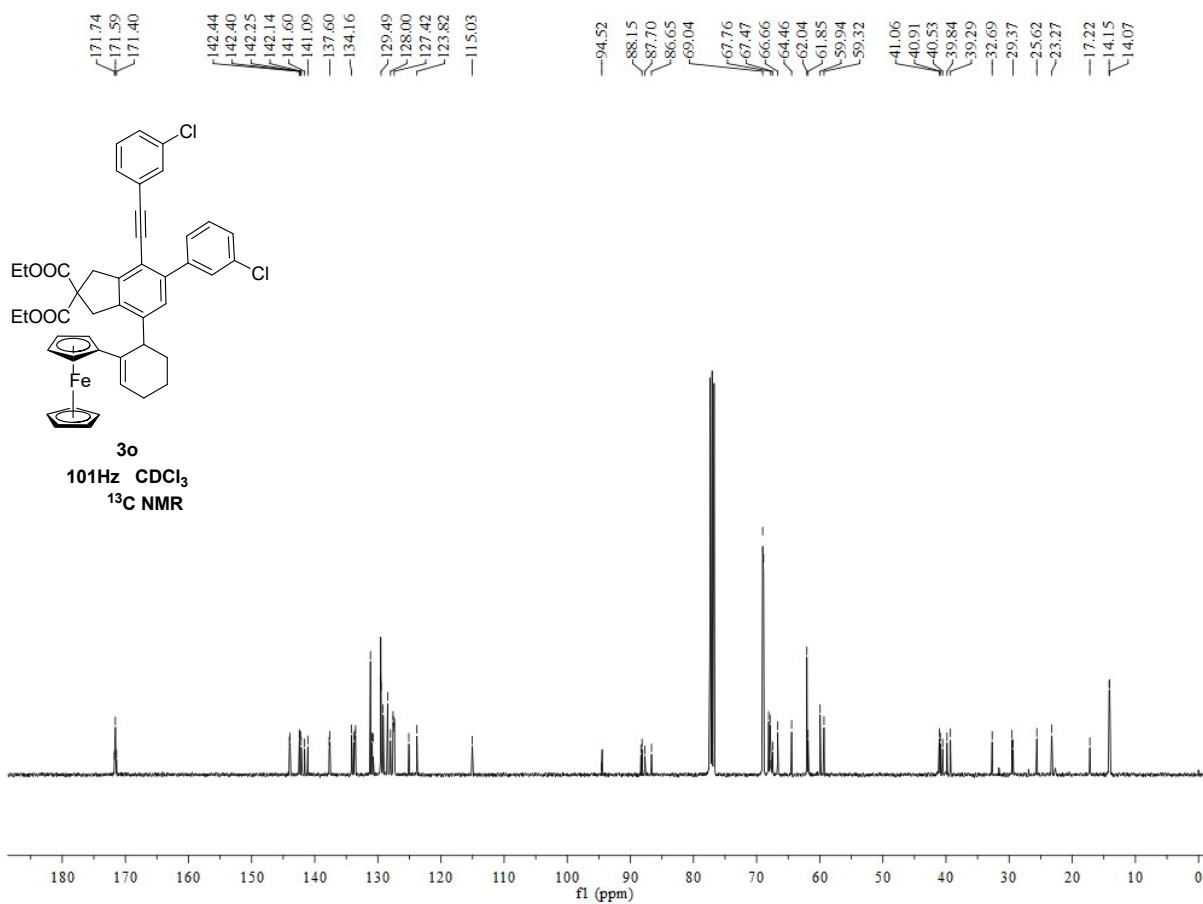

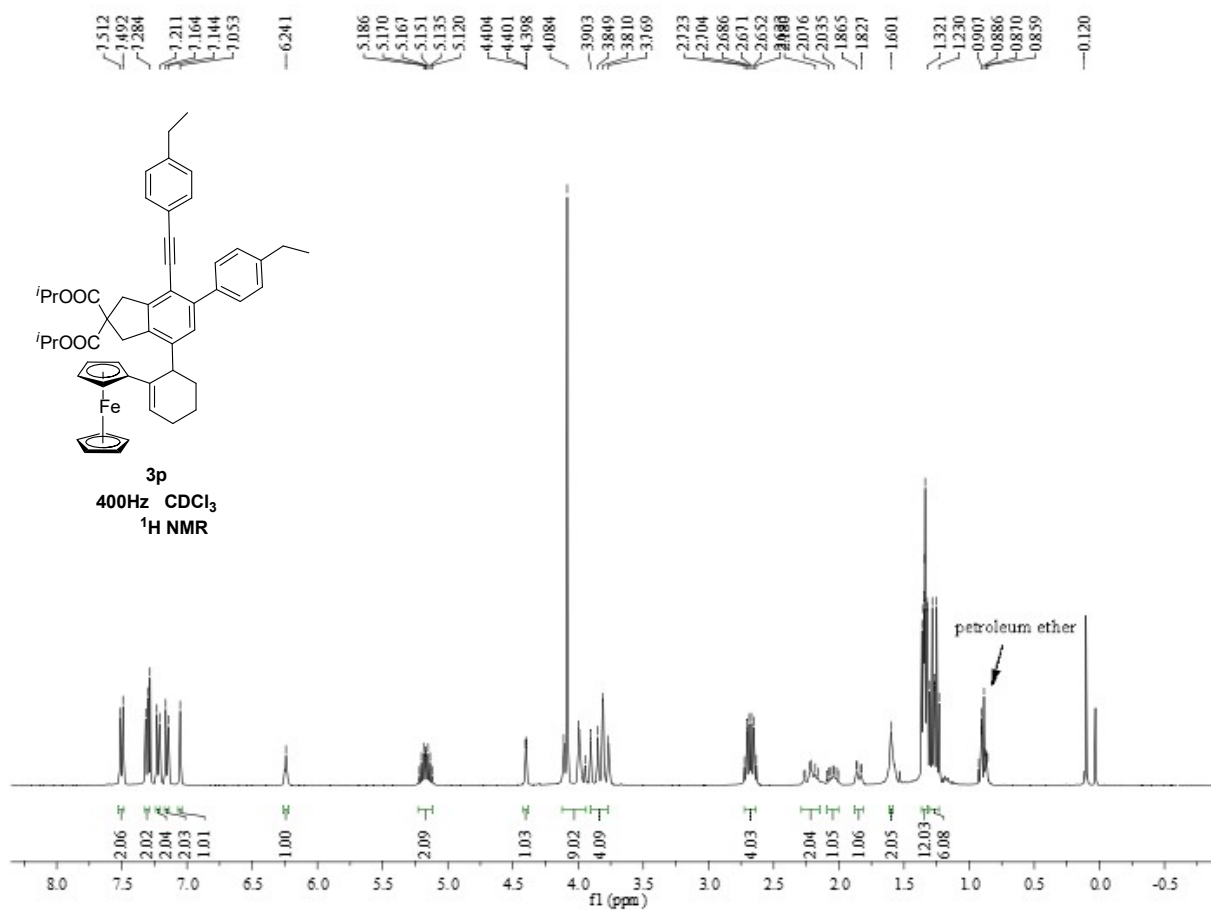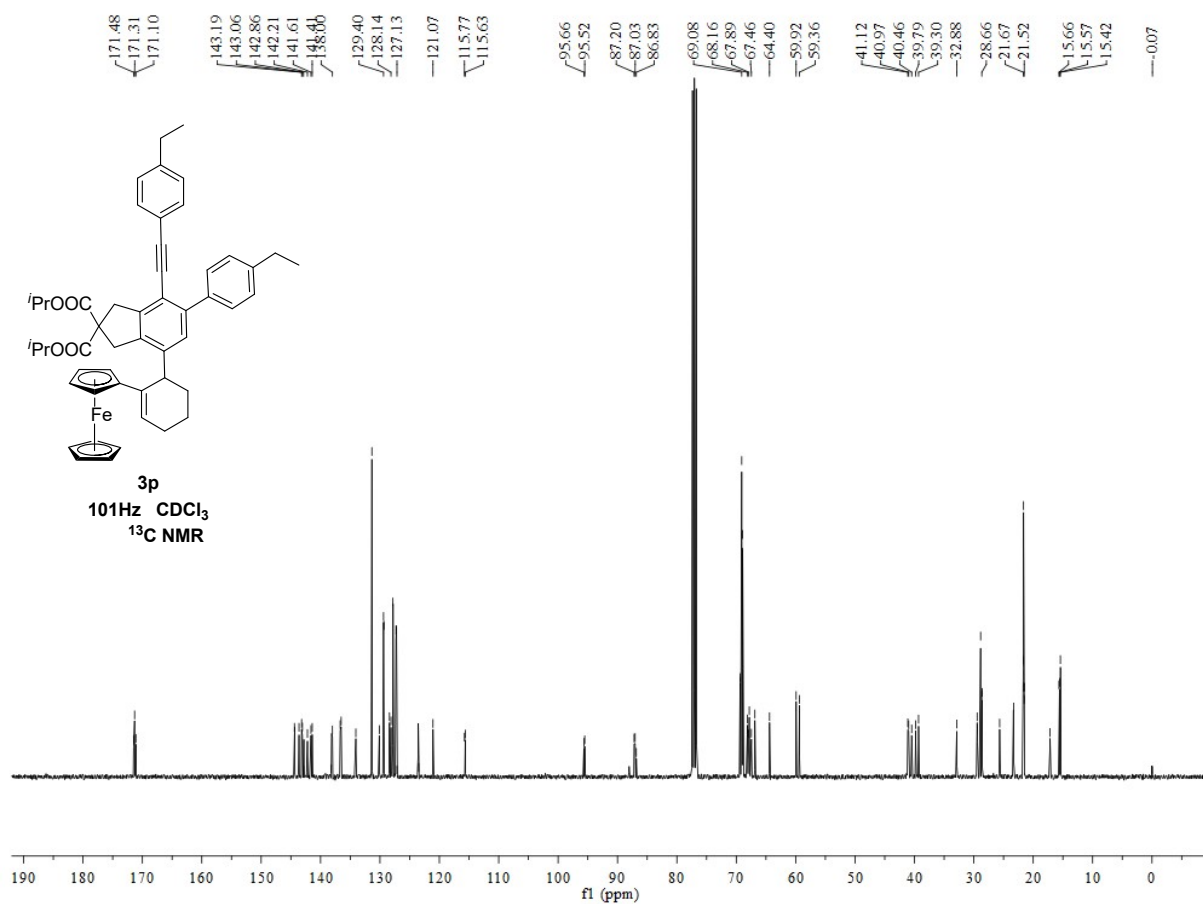

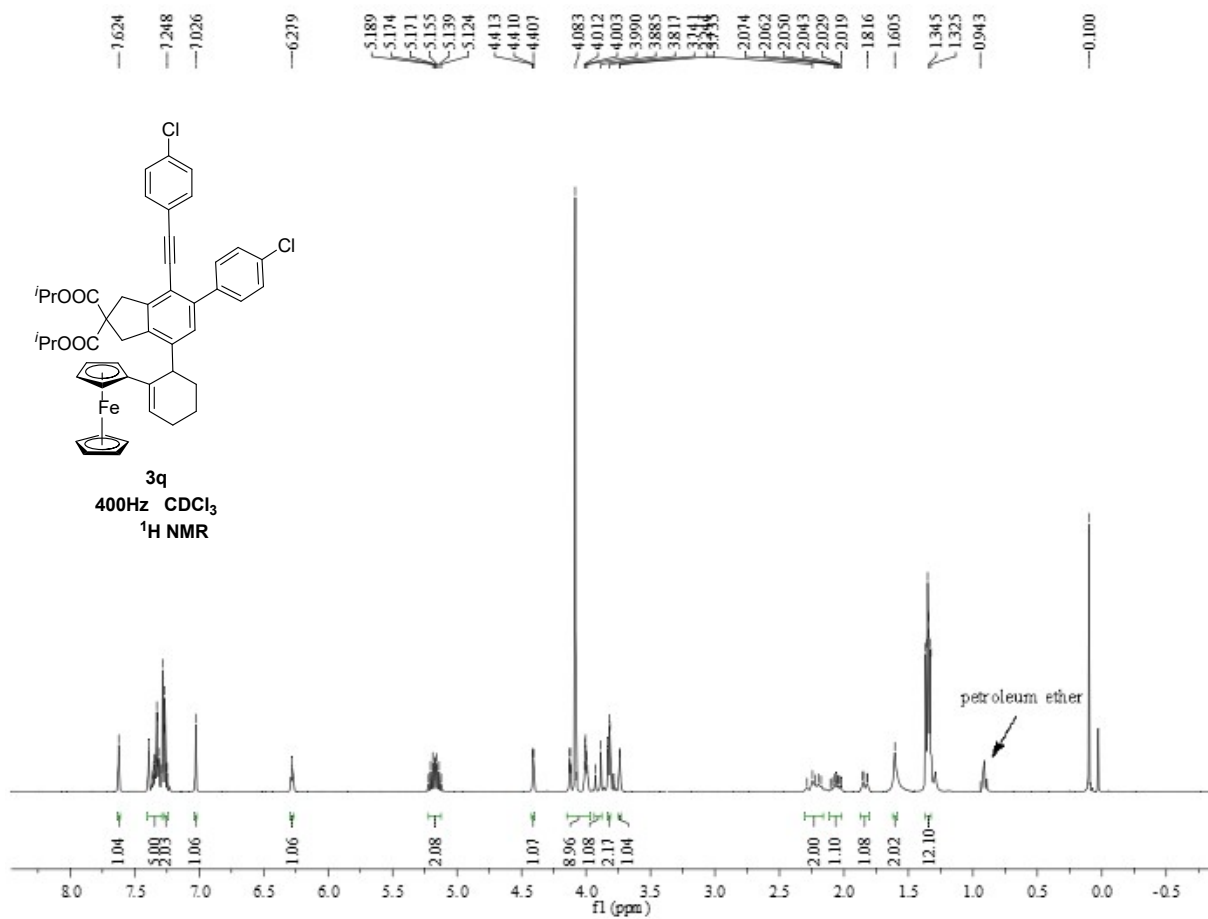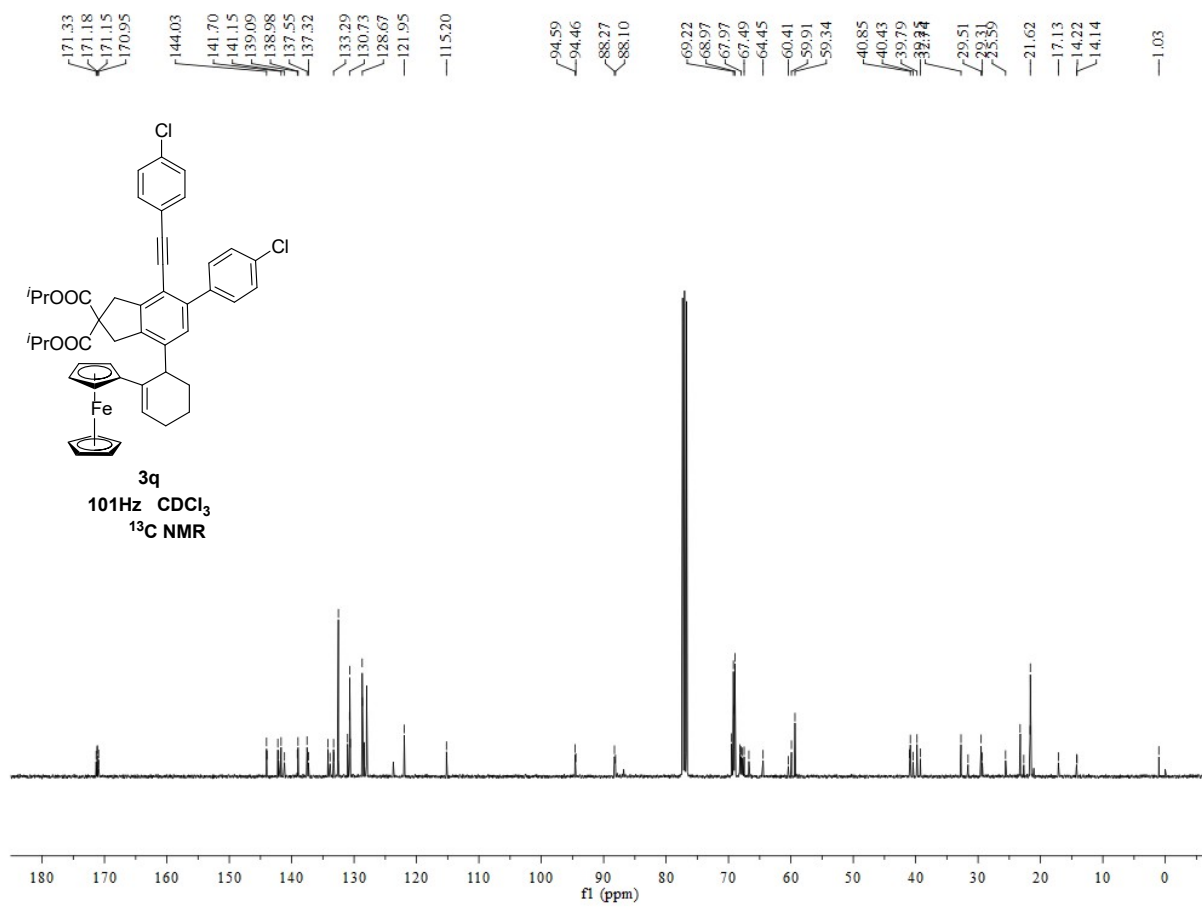

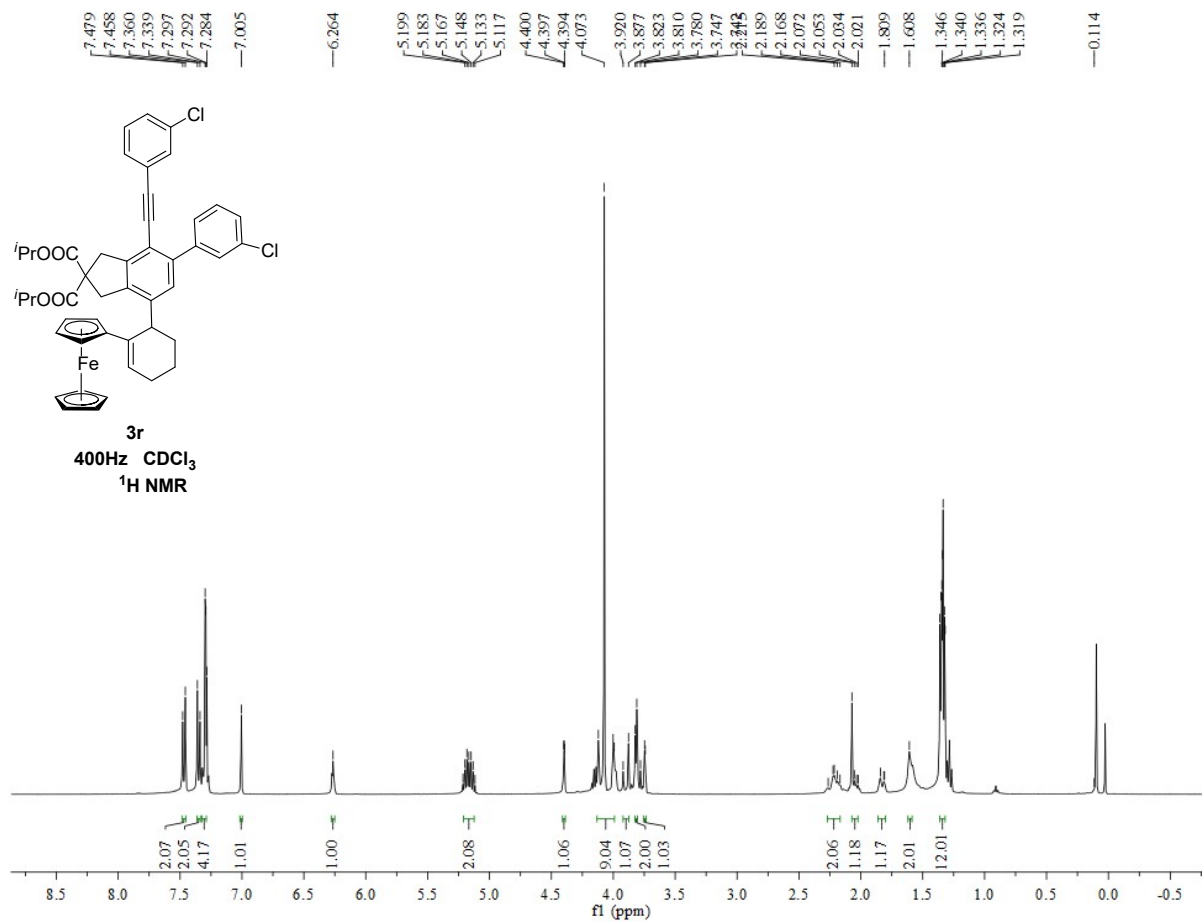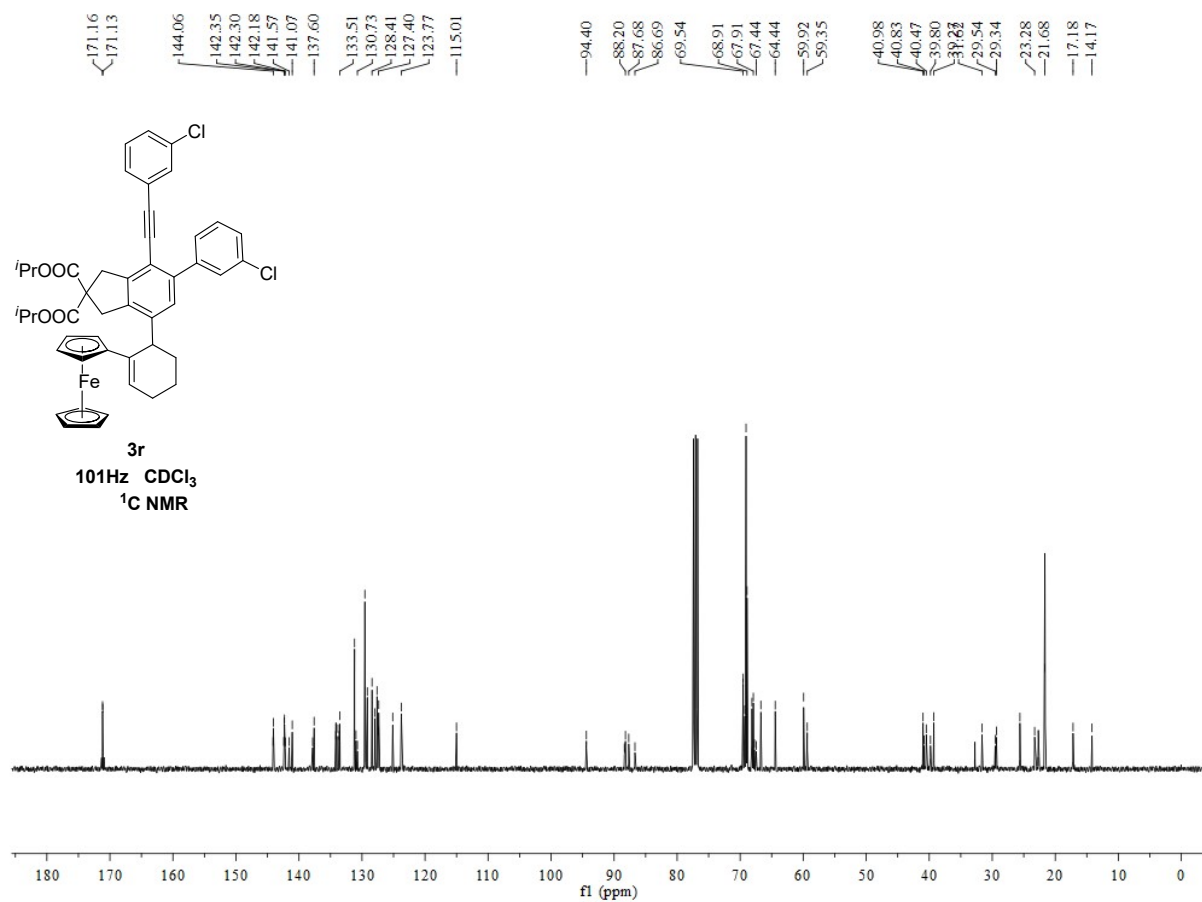

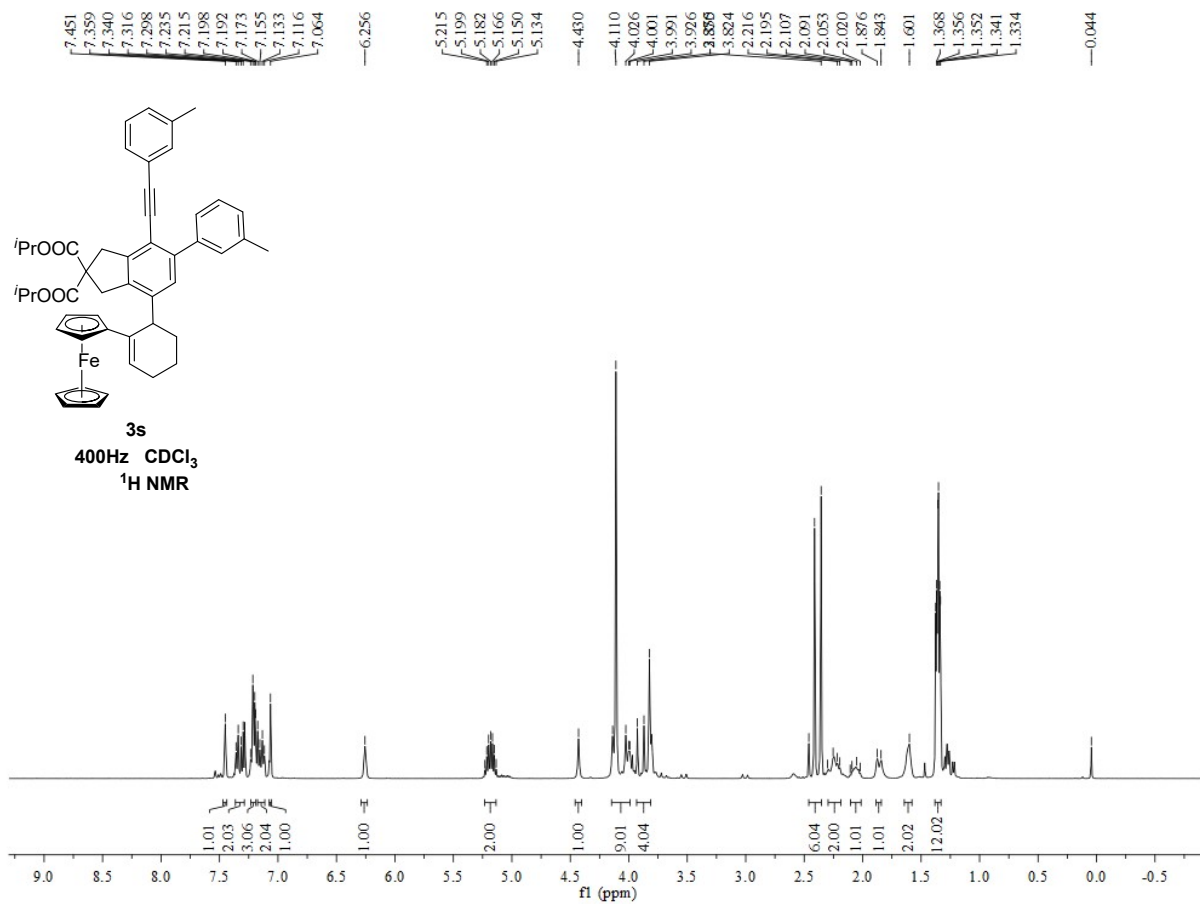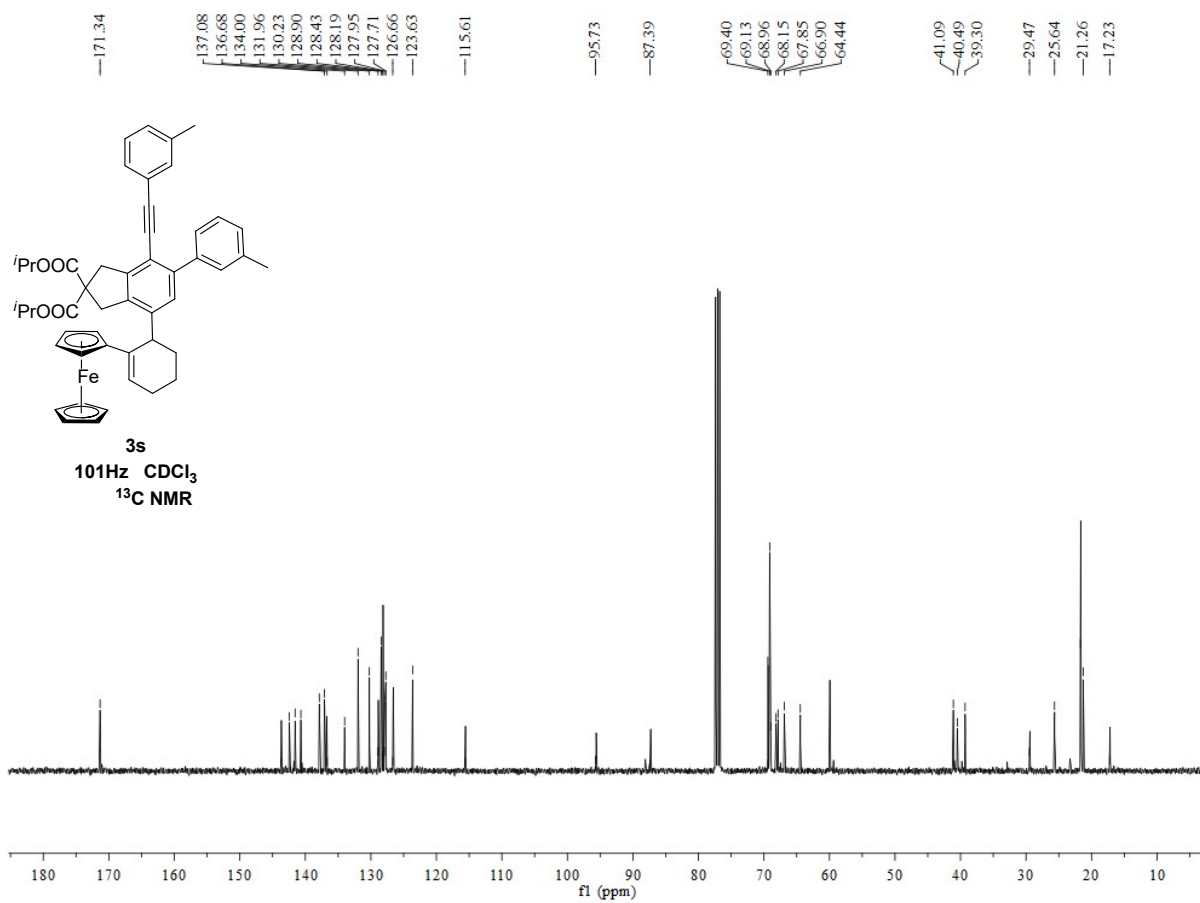

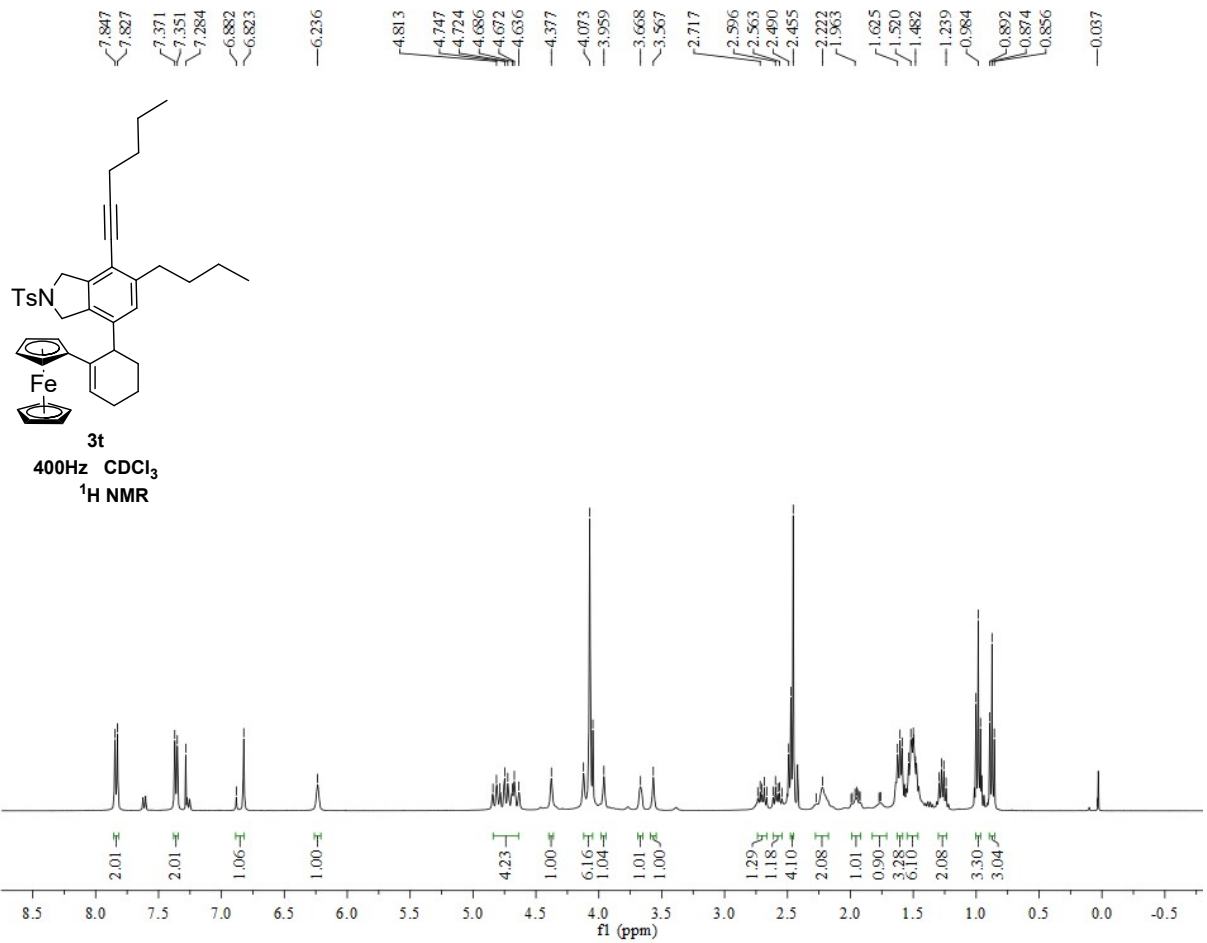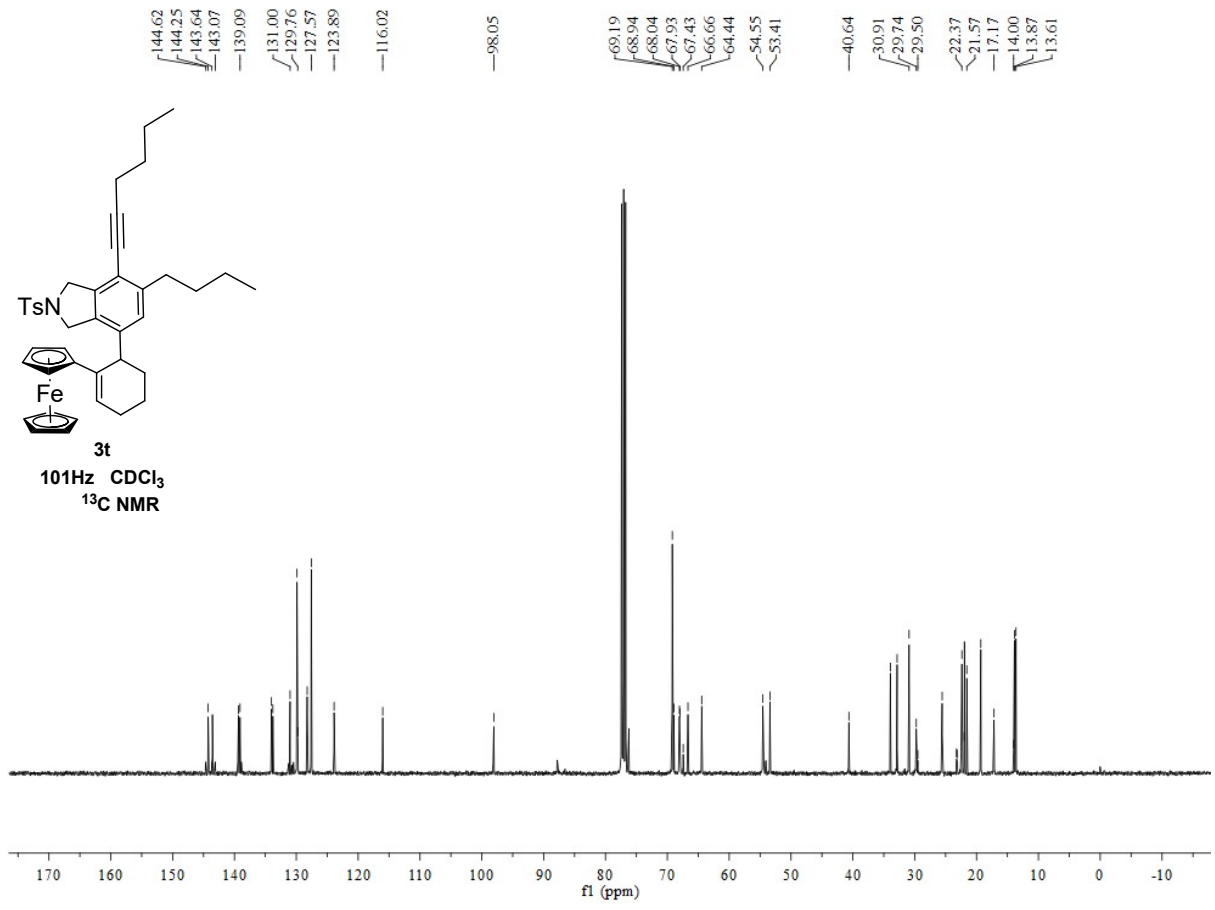



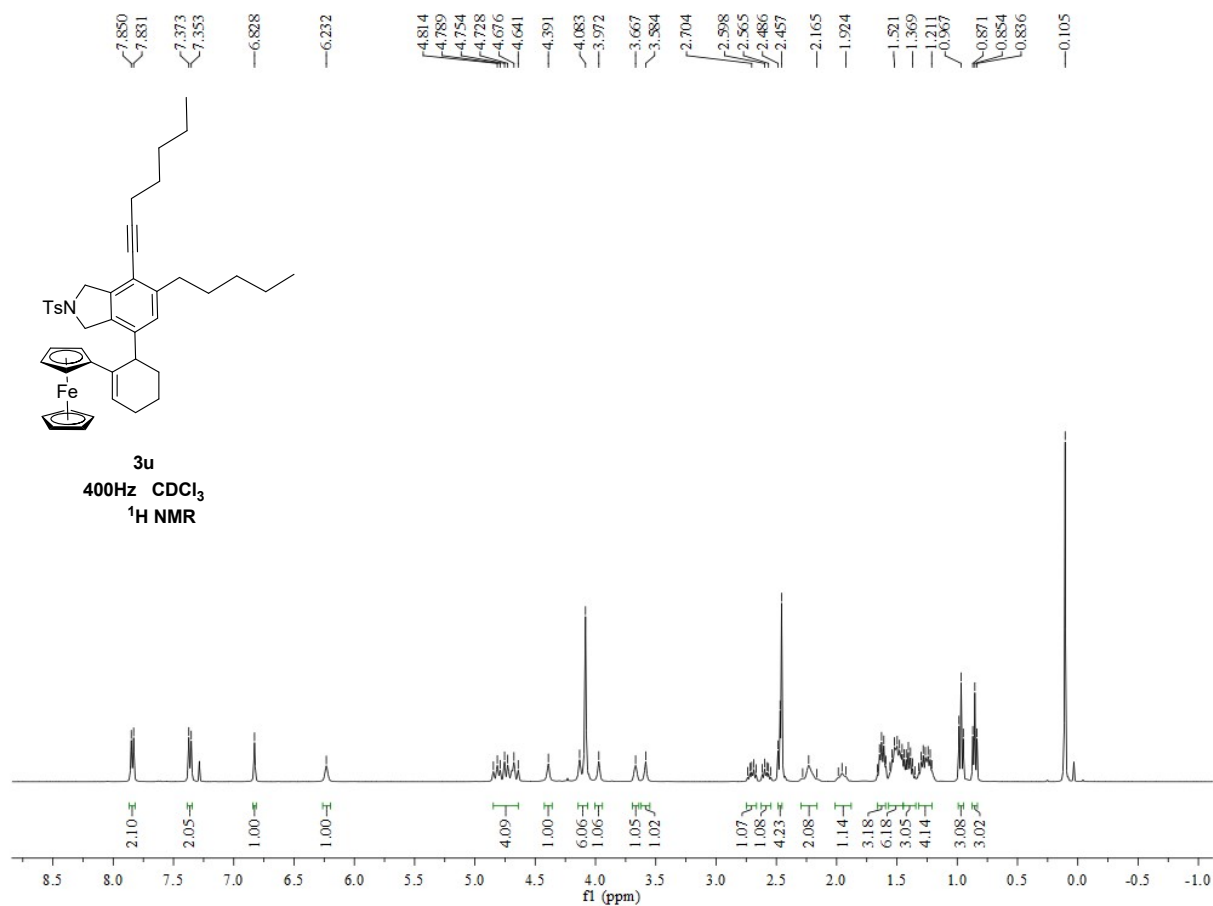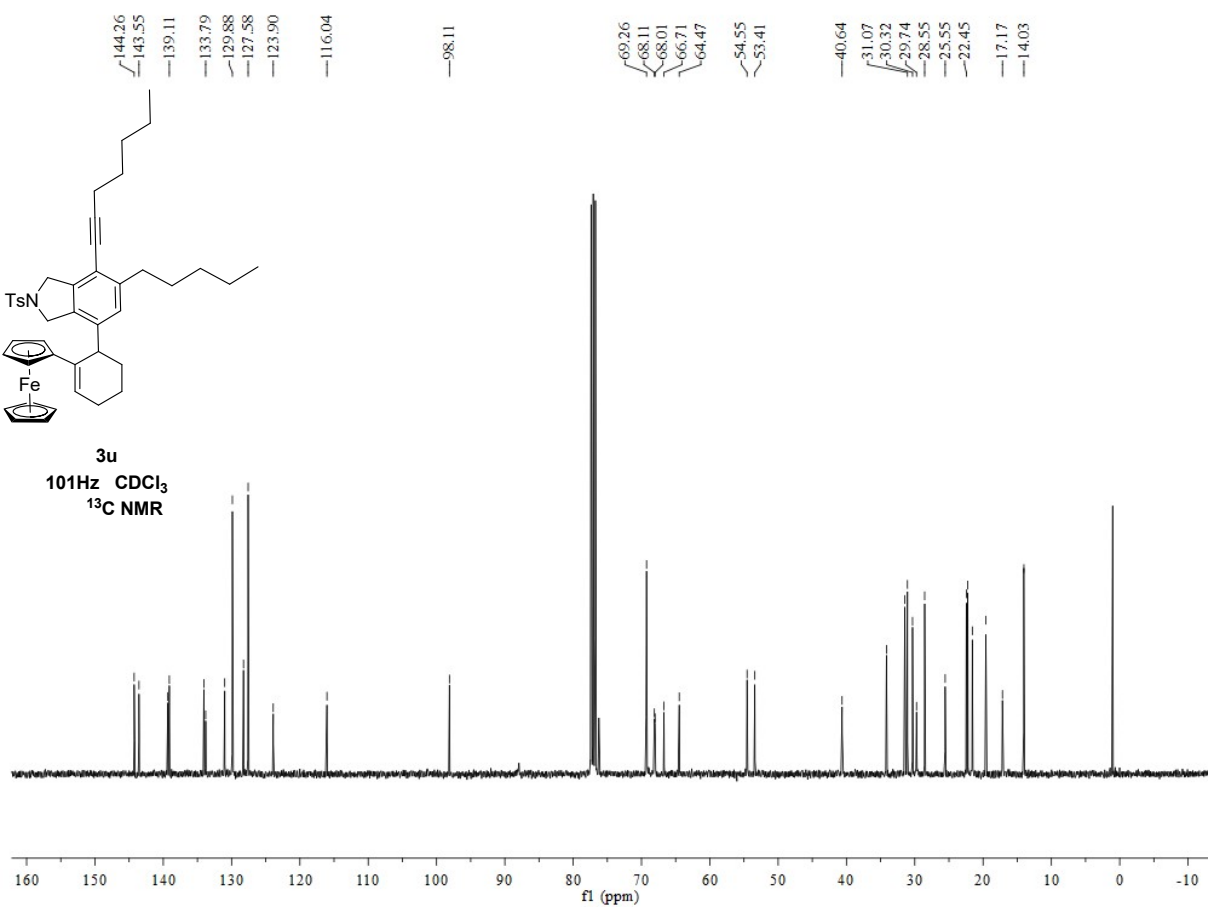

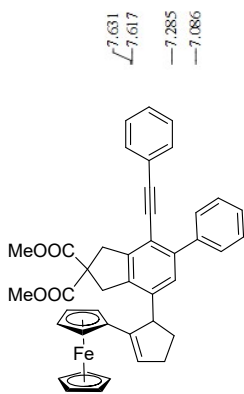

**3v**  
400Hz CDCl<sub>3</sub>  
<sup>1</sup>H NMR

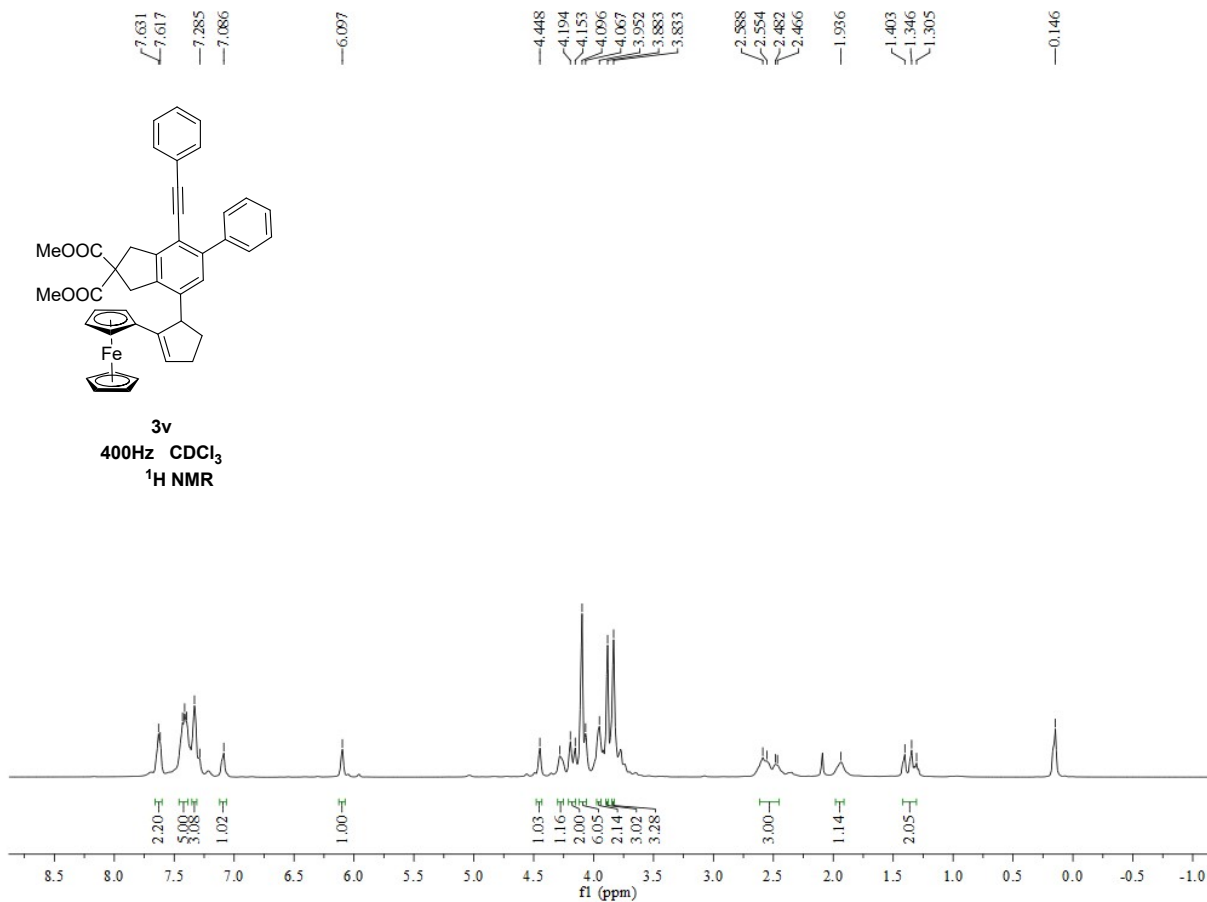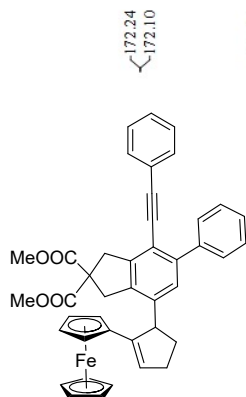

**3v**  
101Hz CDCl<sub>3</sub>  
<sup>13</sup>C NMR

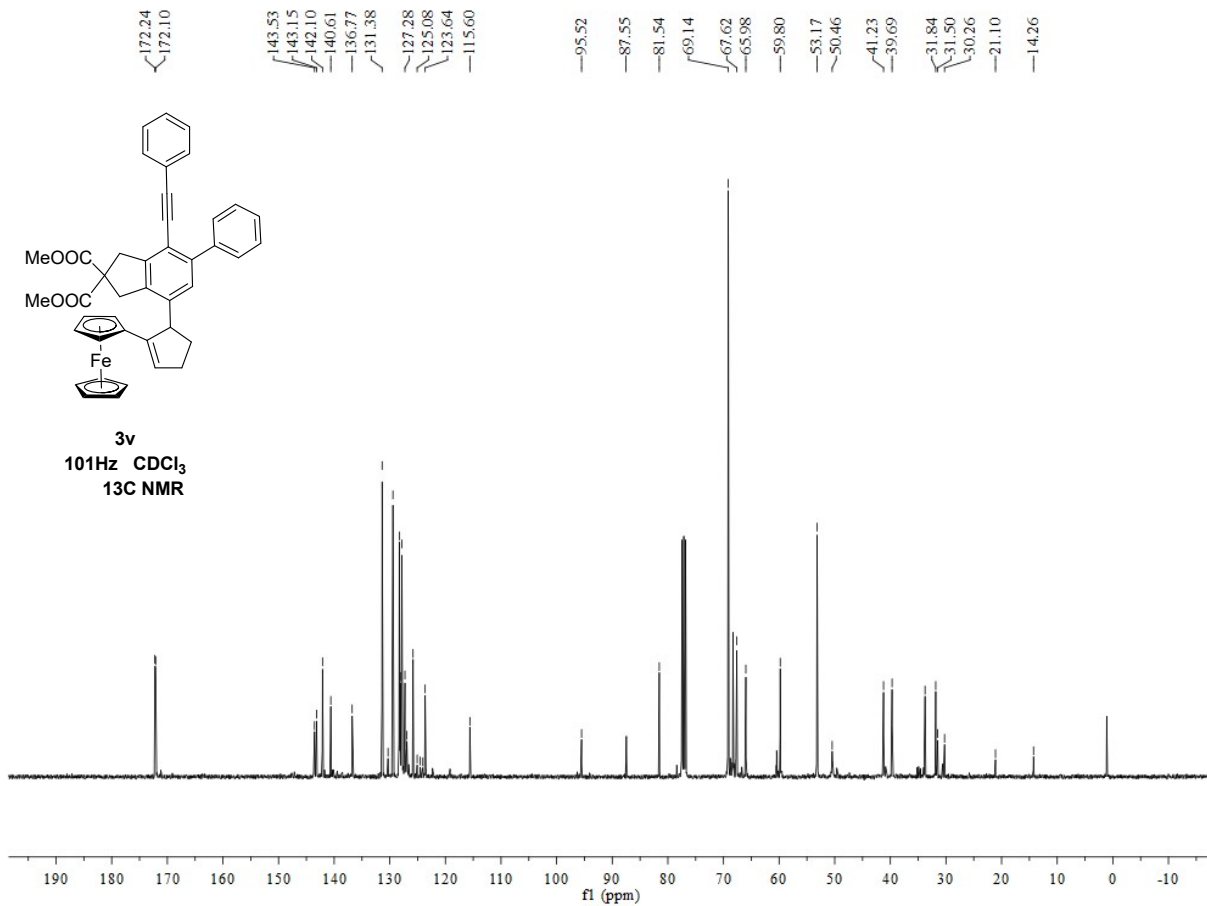

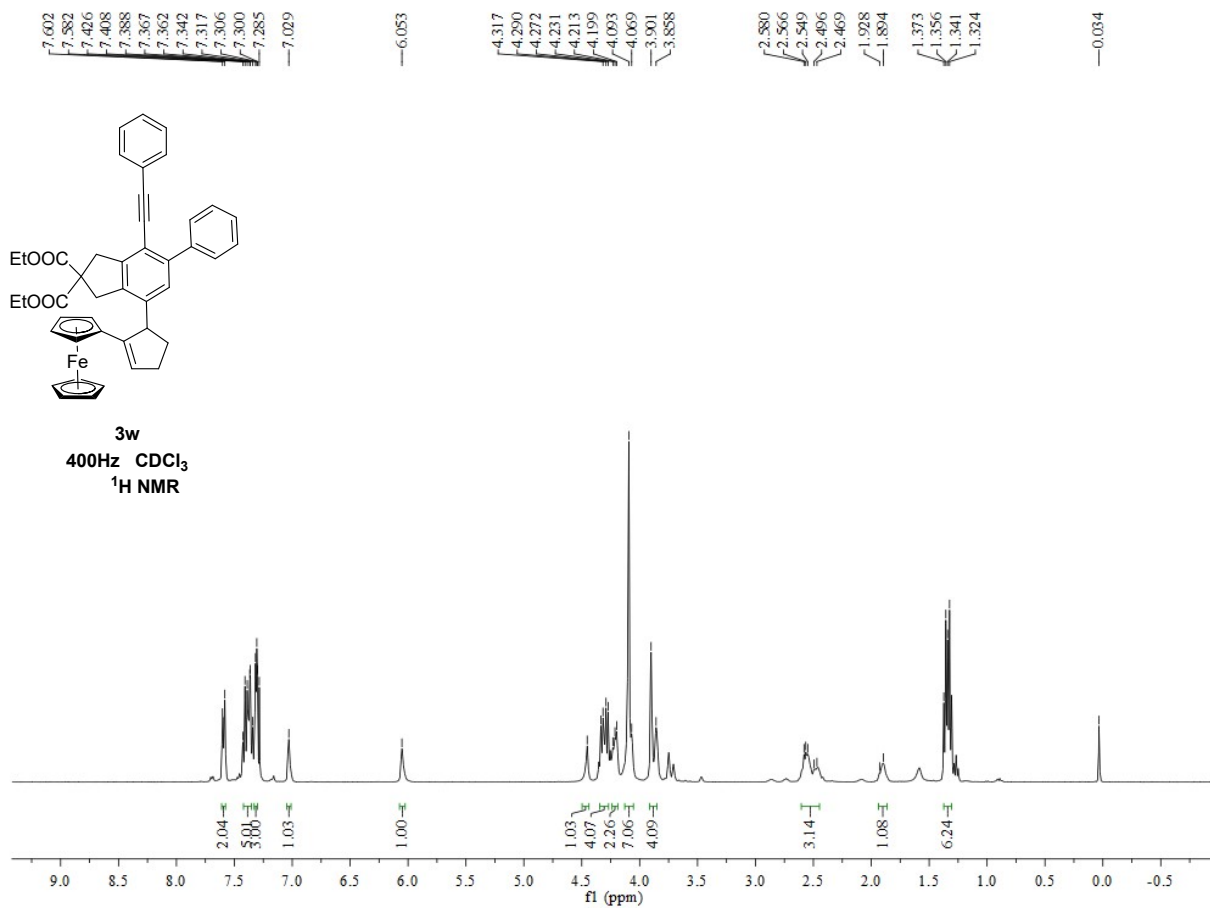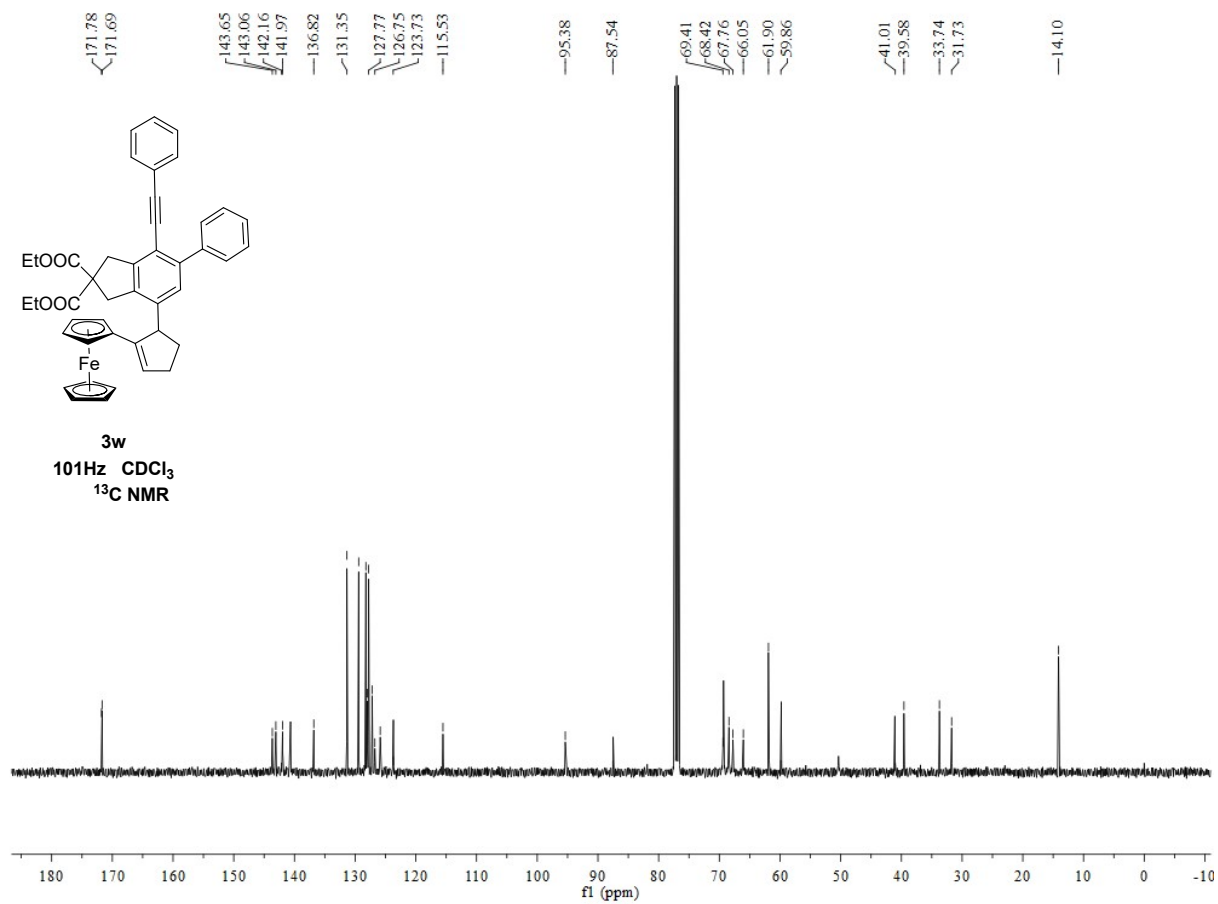

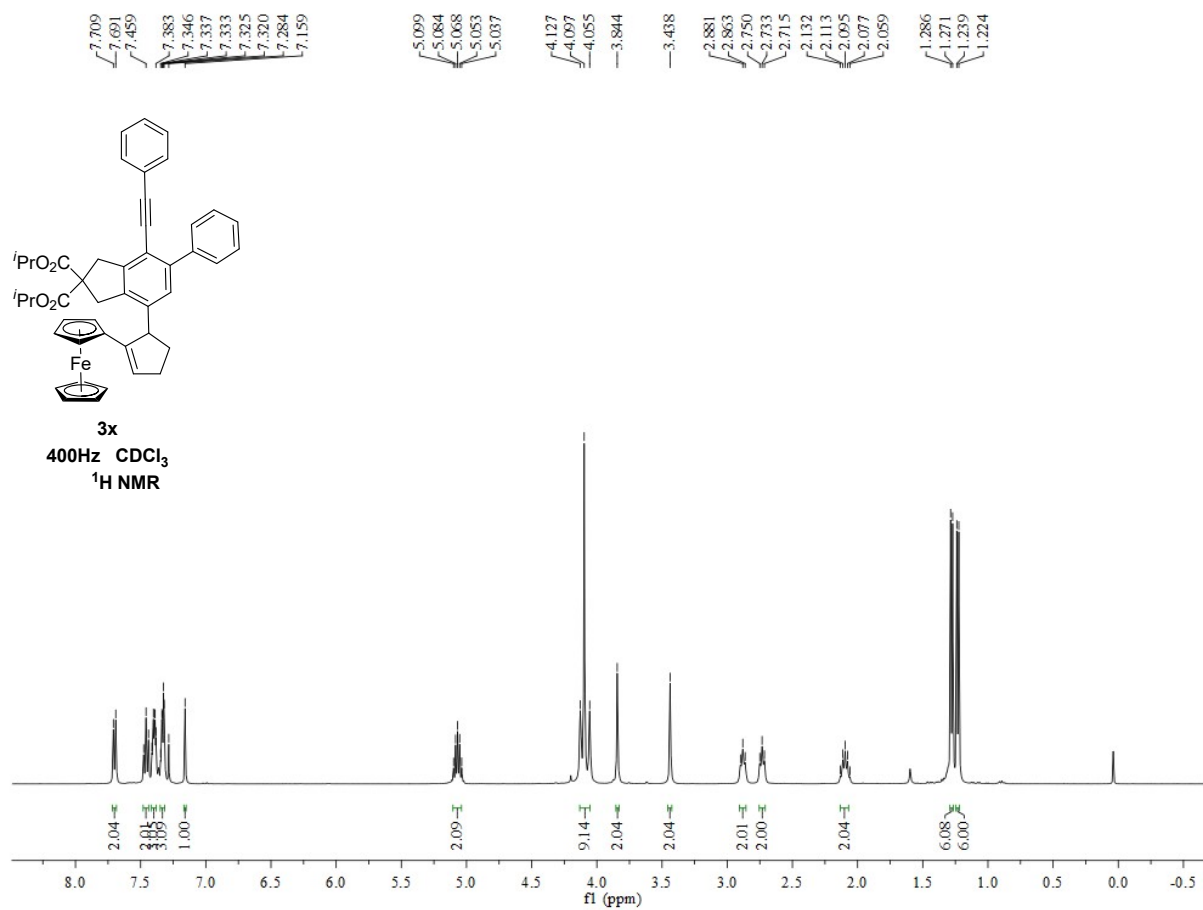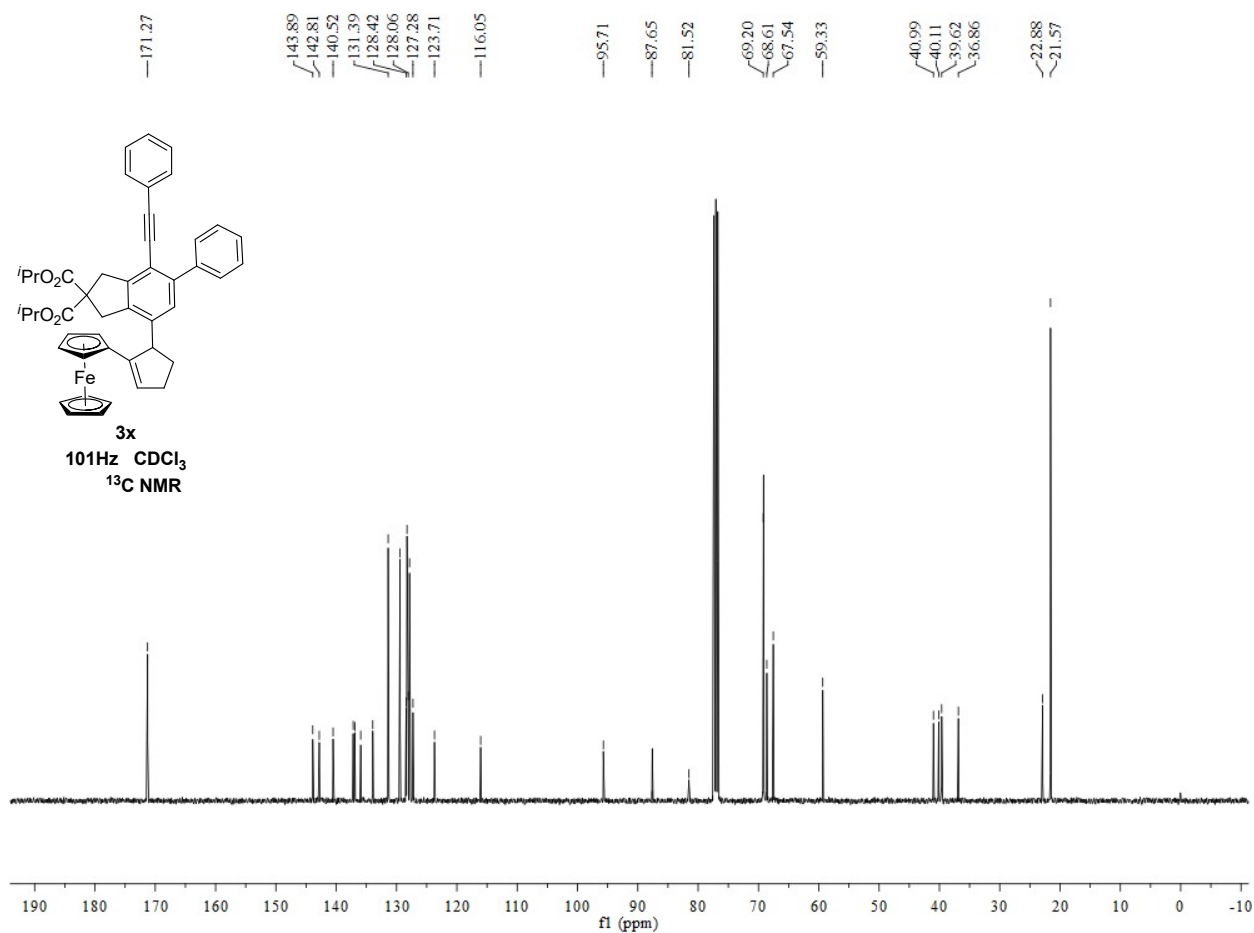

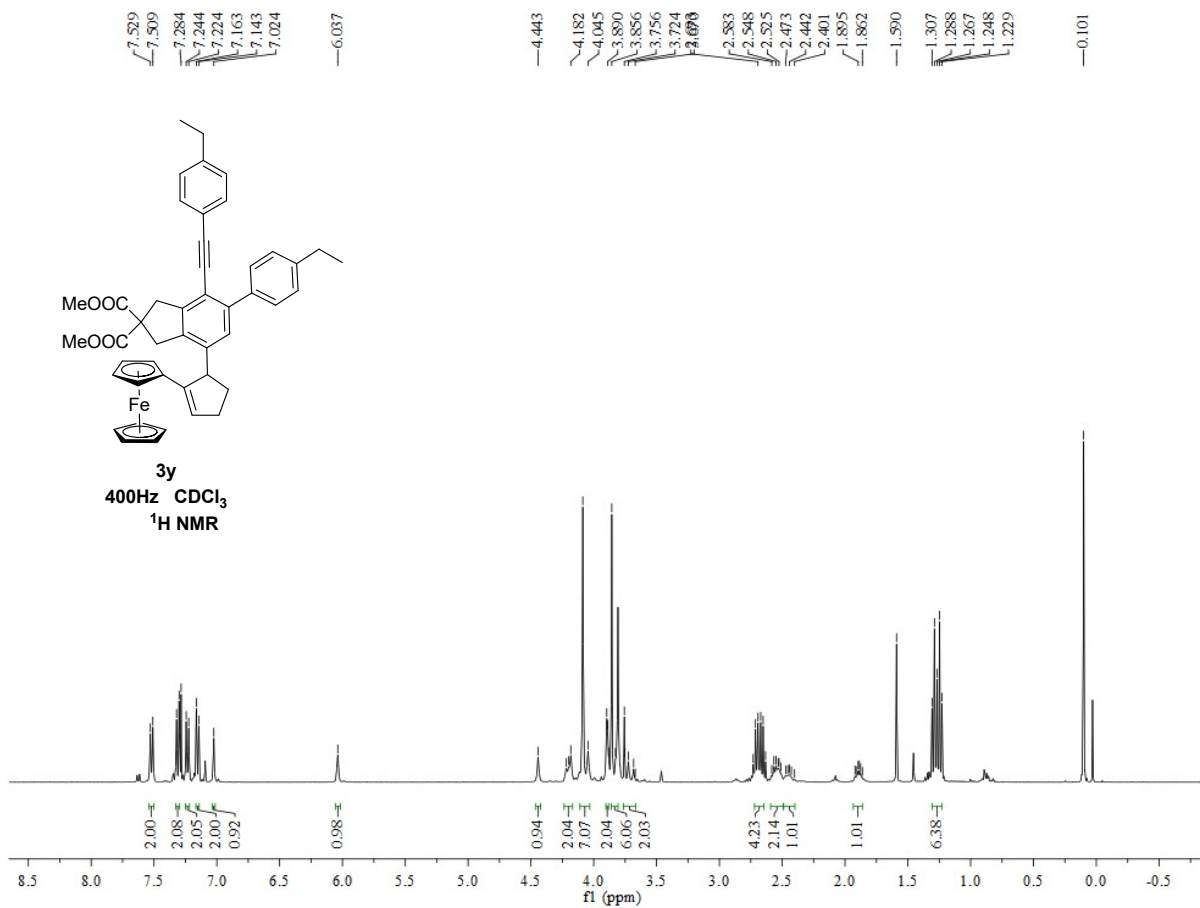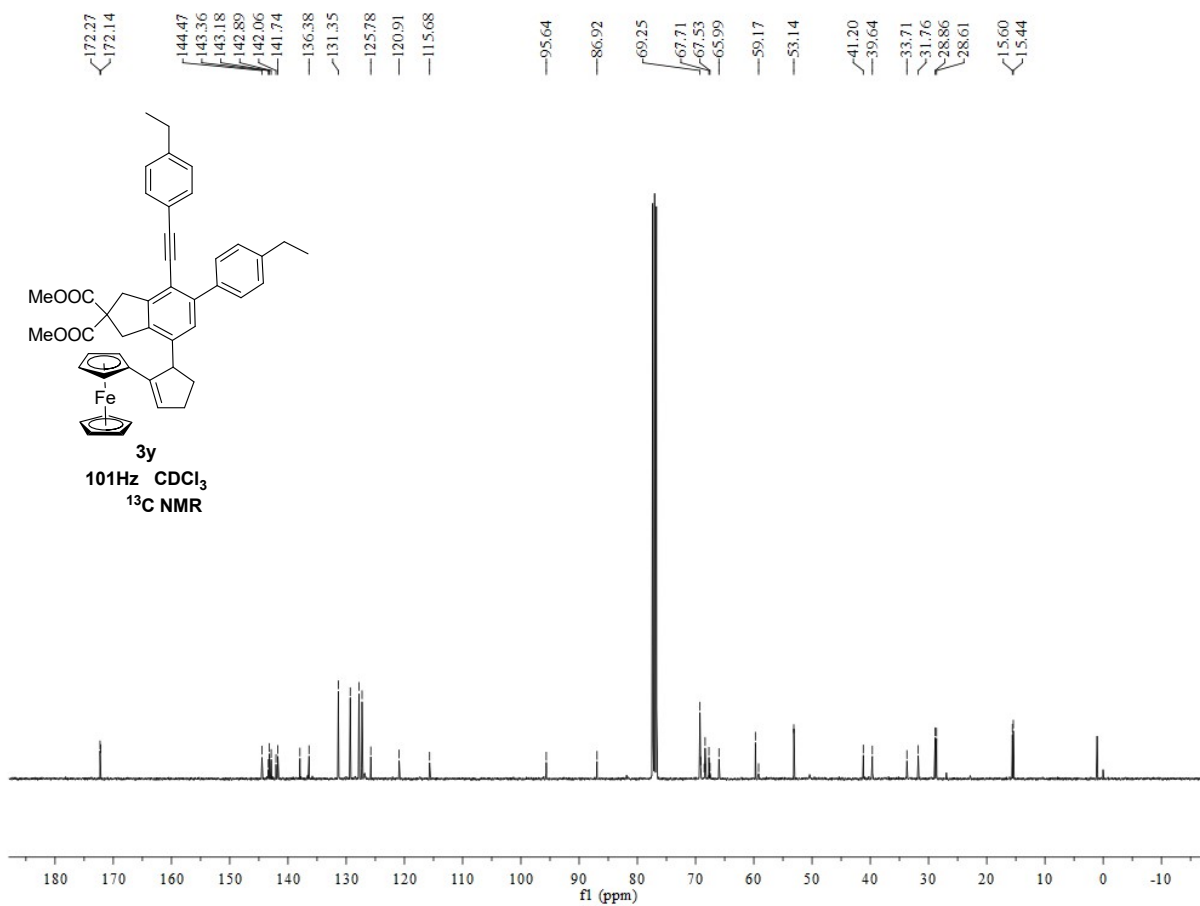

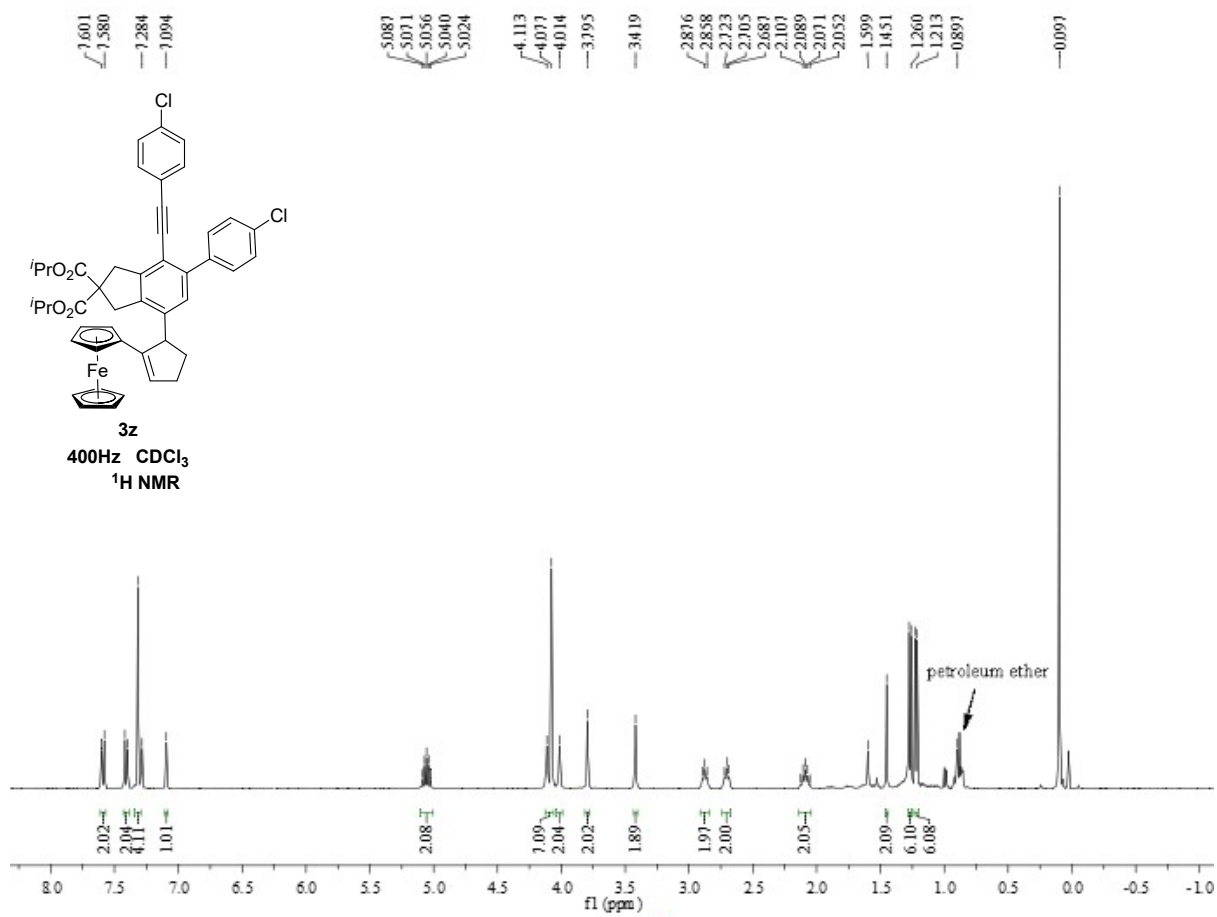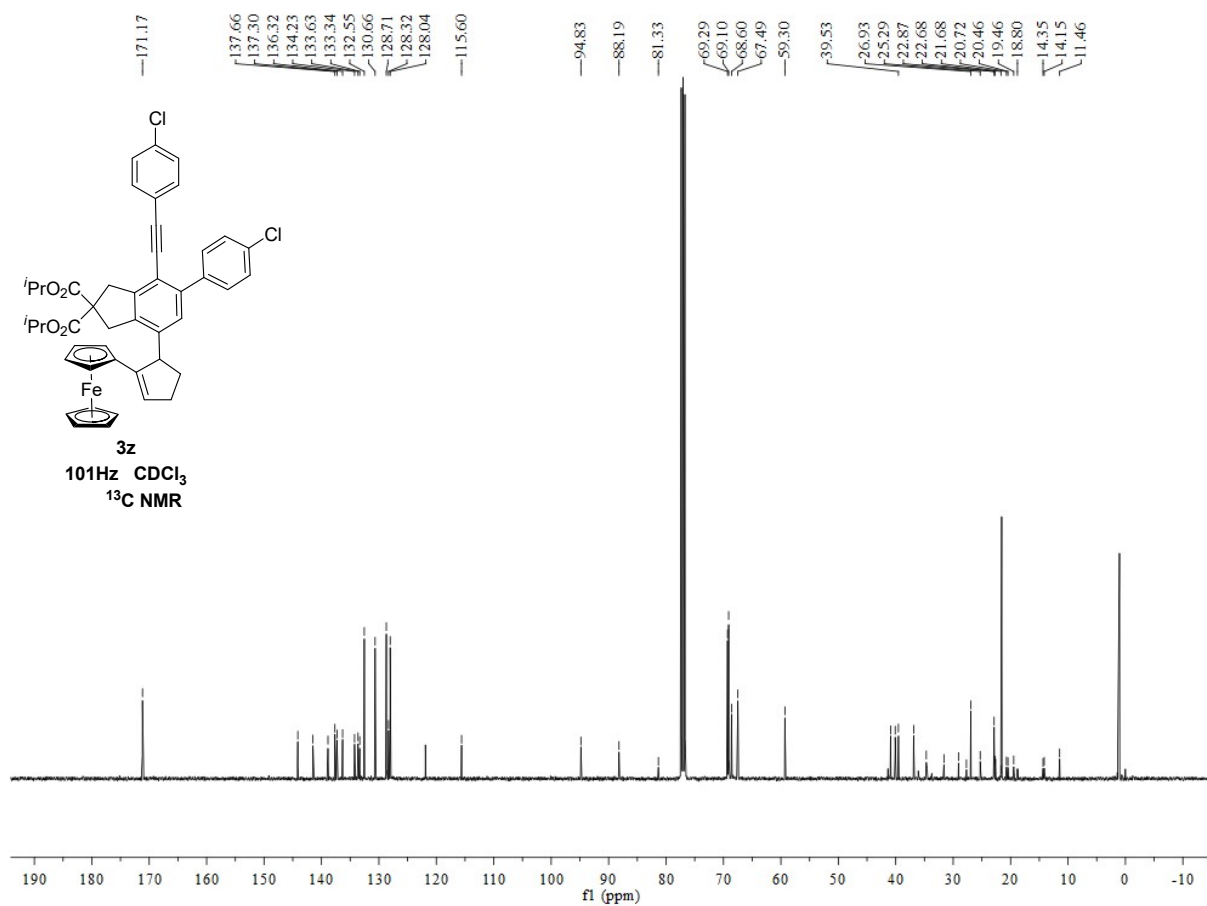

## 5. Computational Details

Geometry optimizations, frequency calculations and thermal corrections to the free energy were performed at B3LYP-D3(BJ) method for all of intermediates and transition states, D3 denoting Grimme's dispersion interaction correction, where the def2-SVP basis set was assigned to short-period elements and MDF10 was used for cobalt center.<sup>[1-6]</sup> All calculations were performed using the Gaussian 16 package.<sup>[7]</sup>

### References

- [1] A. D. Becke. *J. Chem. Phys.* **1993**, *98*, 5648-5652.
- [2] C. Lee, W. Yang, R. G. Parr. *Phys. Rev. B* **1988**, *37*, 785-789.
- [3] A. Schäfer, H. Horn, R. Ahlrichs. *J. Chem. Phys.* **1992**, *97*, 2571-2577.
- [4] S. Grimme, J. Antony, S. Ehrlich, H. Krieg. *J. Chem. Phys.* **2010**, *132*, 154104.
- [5] S. Grimme, S. Ehrlich, L. Goerigk. *J. Comput. Chem.* **2011**, *32*, 1456-1465.
- [6] M. Dolg, U. Wedig, H. Stoll, H. Preuss. *J. Chem. Phys.* **1987**, *86*, 866-872.
- [7] M. J. Frisch, G. W. Trucks, H. B. Schlegel, G. E. Scuseria, M. A. Robb, J. R. Cheeseman, G. Scalmani, V. Barone, G. A. Petersson, H. Nakatsuji, X. Li, M. Caricato, A.V. Marenich, J. Bloino, B. G. Janesko, R. Gomperts, B. Mennucci, H. P. Hratchian, J. V. Ortiz, A. F. Izmaylov, J. L. Sonnenberg, D. Williams-Young, F. Ding, F. Lipparini, F. Egidi, J. Goings, B. Peng, A. Petrone, T. Henderson, D. Ranasinghe, V. G. Zakrzewski, J. Gao, N. Rega, G. Zheng, W. Liang, M. Hada, M. Ehara, K. Toyota, R. Fukuda, J. Hasegawa, M. Ishida, T. Nakajima, Y. Honda, O. Kitao, H. Nakai, T. Vreven, K. Throssell, J. A. Jr. Montgomery, J. E. Peralta, F. Ogliaro, M. J. Bearpark, J. J. Heyd, E. N. Brothers, K. N. Kudin, V. N. Staroverov, T. A. Keith, R. Kobayashi, J. Normand, K. Raghavachari, A. P. Rendell, J. C. Burant, S. S. Iyengar, J. Tomasi, M. Cossi, J. M. Millam, M. Klene, C. Adamo, R. Cammi, J. W. Ochterski, R. L. Martin, K. Morokuma, O. Farkas, J. B. Foresman, D. J. Fox. *Gaussian 16, Revision A.01*, Gaussian, Inc., Wallingford CT, 2016.

### Calculated Energy Values

**Table S1.** Energies (in kcal/mol) calculated at B3LYP+D3(BJ)/6-311+G(2d,p)

| Species        | $E_{\text{ele}} / \text{A.U.}$ | $G_{\text{corr}} / \text{A.U.}$ | $G/\text{A.U.}$ | DG/(kcal/mol) |
|----------------|--------------------------------|---------------------------------|-----------------|---------------|
| <b>1a (1v)</b> | -1340.747916                   | 0.327409                        | -1340.42        |               |
| <b>2c</b>      | -234.504282                    | 0.117076                        | -234.387        |               |
| <b>INA</b>     | -1340.810681                   | 0.33369                         | -1340.48        | -35.4449      |
| <b>2a</b>      | -744.1037348                   | 0.253898                        | -743.85         |               |
| <b>3a</b>      | -2085.072543                   | 0.615799                        | -2084.46        | -116.968      |
| <b>TSC</b>     | -1575.326153                   | 0.472732                        | -1574.85        | -28.6829      |
| <b>TSA</b>     | -2084.930363                   | 0.608793                        | -2084.32        | -32.1455      |
| <b>3c</b>      | -1575.469204                   | 0.47848                         | -1574.99        | -114.842      |

### Cartesian Coordinates for All Species

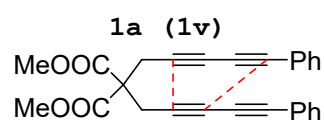

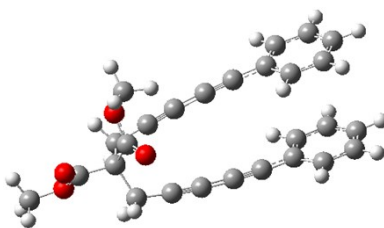

| Atomic Type | Coordinates (Angstroms) |             |             |
|-------------|-------------------------|-------------|-------------|
|             | X                       | Y           | Z           |
| C           | -3.88156500             | 0.22659800  | 0.06130300  |
| C           | -3.45352000             | 1.71145900  | -0.13080700 |
| H           | -3.93136700             | 2.07879700  | -1.05345700 |
| H           | -3.86669200             | 2.29199900  | 0.71020600  |
| C           | -3.25452600             | -0.43441400 | 1.32752900  |
| H           | -3.39630800             | 0.25070000  | 2.17839900  |
| H           | -3.82708400             | -1.34665800 | 1.55976100  |
| C           | -3.55199000             | -0.57295900 | -1.20656400 |
| O           | -3.24051300             | -0.08669800 | -2.26113200 |
| O           | -3.66763100             | -1.88600300 | -0.98187000 |
| C           | -5.40865200             | 0.22194800  | 0.19776200  |
| O           | -6.17748400             | -0.13207300 | -0.65889600 |
| O           | -5.79038100             | 0.69957000  | 1.39243000  |
| C           | -3.39444900             | -2.74151100 | -2.09215500 |
| H           | -3.52648300             | -3.76669100 | -1.72686000 |
| H           | -4.09079700             | -2.53282200 | -2.91754300 |
| H           | -2.36484500             | -2.58978900 | -2.44790100 |
| C           | -7.20002500             | 0.77394100  | 1.62337400  |
| H           | -7.32169600             | 1.17835400  | 2.63499400  |
| H           | -7.67794500             | 1.43322700  | 0.88400900  |
| H           | -7.65599600             | -0.22413500 | 1.54923200  |
| C           | -2.01728000             | 1.91944300  | -0.21284700 |
| C           | -1.84955400             | -0.78937800 | 1.19037600  |
| C           | -0.80504100             | 2.04366000  | -0.24427000 |
| C           | -0.67588900             | -1.09053700 | 1.05270500  |
| C           | 0.56016000              | 2.09245900  | -0.23910800 |
| C           | 0.65050600              | -1.35967000 | 0.86219000  |
| C           | 1.78279900              | 2.07443500  | -0.20811200 |
| C           | 1.84058700              | -1.56489700 | 0.66738500  |
| C           | 3.20178000              | 1.98851100  | -0.13470700 |
| C           | 3.81760500              | 1.47661700  | 1.02796200  |
| C           | 4.01204200              | 2.37590700  | -1.22253300 |
| C           | 5.20242000              | 1.35316600  | 1.09403200  |
| H           | 3.19037200              | 1.16074000  | 1.86242500  |
| C           | 5.39797100              | 2.24955500  | -1.14573400 |
| H           | 3.53893600              | 2.76987700  | -2.12381700 |
| C           | 5.99675300              | 1.73717300  | 0.00937800  |
| H           | 5.66528000              | 0.93766300  | 1.99141700  |
| H           | 6.01611900              | 2.55012900  | -1.99512200 |
| H           | 7.08260600              | 1.63021600  | 0.06195600  |
| C           | 3.22825500              | -1.73824300 | 0.40108300  |
| C           | 4.09204700              | -2.28893600 | 1.37017700  |
| C           | 3.76500700              | -1.32097000 | -0.83607500 |
| C           | 5.45550200              | -2.41206700 | 1.10677100  |
| H           | 3.68040600              | -2.61031900 | 2.32863900  |
| C           | 5.12761400              | -1.44819700 | -1.08877800 |
| H           | 3.10058000              | -0.87929200 | -1.57957400 |
| C           | 5.97755000              | -1.99300600 | -0.12064300 |
| H           | 6.11633700              | -2.83782100 | 1.86570000  |
| H           | 5.53258600              | -1.10687600 | -2.04366700 |
| H           | 7.04740800              | -2.08621100 | -0.32122100 |

2a



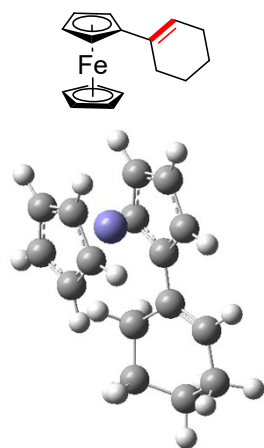

| Atomic Type | Coordinates (Angstroms) |             |             |
|-------------|-------------------------|-------------|-------------|
|             | X                       | Y           | Z           |
| C           | -1.70322600             | 2.10804500  | 0.28279600  |
| C           | -1.68062100             | 1.80304400  | -1.11157500 |
| C           | -0.42749400             | 1.18843300  | -1.40614400 |
| C           | 0.34342700              | 1.11285400  | -0.19483500 |
| C           | -0.46547800             | 1.68100700  | 0.84767800  |
| H           | -2.53377500             | 2.55332400  | 0.82751000  |
| H           | -2.48682800             | 1.98166400  | -1.82059900 |
| H           | -0.11496900             | 0.82461200  | -2.38221200 |
| H           | -0.19497700             | 1.74143400  | 1.89944900  |
| Fe          | -1.43744500             | 0.07892800  | -0.00118900 |
| C           | -0.94011400             | -1.86444800 | 0.47154000  |
| C           | -1.67626400             | -1.82756600 | -0.75282300 |
| C           | -1.76048000             | -1.30201300 | 1.49630600  |
| H           | 0.08163200              | -2.21897200 | 0.59607900  |
| C           | -2.95185700             | -1.24267500 | -0.48402300 |
| H           | -1.31837500             | -2.16131300 | -1.72529500 |
| C           | -3.00386700             | -0.91756700 | 0.90606000  |
| H           | -1.47566600             | -1.16290500 | 2.53764300  |
| H           | -3.73548800             | -1.05289900 | -1.21534500 |
| H           | -3.83428100             | -0.43642200 | 1.41976200  |
| C           | 1.68464100              | 0.52010800  | -0.06342000 |
| C           | 2.15607400              | -0.36786300 | -1.19766600 |
| C           | 2.46631200              | 0.75912700  | 1.00799900  |
| C           | 3.35679200              | -1.23526100 | -0.81315900 |
| H           | 2.41291000              | 0.26602400  | -2.06716500 |
| H           | 1.31978500              | -1.00309900 | -1.53155000 |
| C           | 3.84613300              | 0.18992600  | 1.19901800  |
| C           | 4.41868700              | -0.40643400 | -0.09019000 |
| H           | 3.77757700              | -1.71795900 | -1.70995300 |
| H           | 3.01883800              | -2.04926800 | -0.14632300 |
| H           | 4.51840700              | 0.97175700  | 1.59382800  |
| H           | 3.81259000              | -0.58656300 | 1.98922200  |
| H           | 5.31045400              | -1.01456000 | 0.13178200  |
| H           | 4.74981600              | 0.41127700  | -0.75498300 |
| H           | 2.08994100              | 1.40944000  | 1.80368300  |

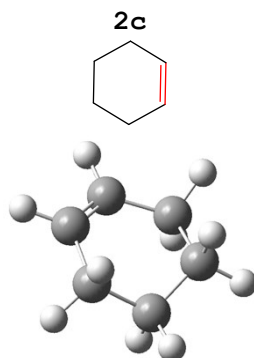

| Atomic Type | Coordinates (Angstroms) |             |             |
|-------------|-------------------------|-------------|-------------|
|             | X                       | Y           | Z           |
| H           | -1.88438700             | -0.08934300 | 1.13831000  |
| C           | 0.66804400              | 1.30431500  | -0.05608300 |
| C           | -0.66692900             | 1.30486400  | 0.05597600  |
| C           | 1.49581100              | 0.04569400  | -0.11000400 |
| H           | 1.20280400              | 2.25895700  | -0.11212500 |
| C           | -1.49570300             | 0.04696400  | 0.11008600  |
| C           | 0.69570900              | -1.19046100 | 0.31865700  |
| H           | 2.39179700              | 0.16237800  | 0.52460700  |
| H           | 1.88458900              | -0.09084900 | -1.13810000 |
| C           | -0.69679500             | -1.18984000 | -0.31871000 |
| H           | -2.39177600             | 0.16424500  | -0.52427900 |
| H           | 1.24438900              | -2.11002800 | 0.05827100  |
| H           | 0.58716800              | -1.18817700 | 1.41806700  |
| H           | -1.24636100             | -2.10891500 | -0.05844100 |
| H           | -0.58826400             | -1.18748100 | -1.41812000 |
| H           | -1.20077900             | 2.25999400  | 0.11227800  |

**INA**

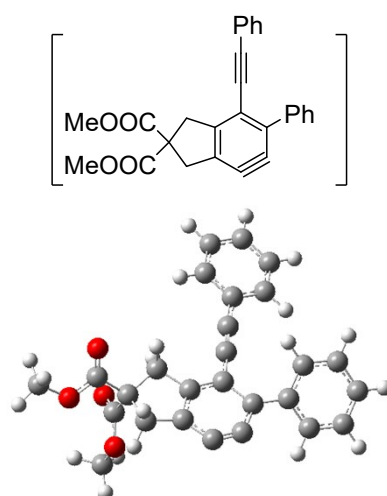

| Atomic Type | Coordinates (Angstroms) |             |             |
|-------------|-------------------------|-------------|-------------|
|             | X                       | Y           | Z           |
| C           | 3.08772900              | -0.00275900 | -0.30320200 |
| C           | 3.12230200              | -1.48854500 | -0.77431000 |
| C           | 1.68733200              | -1.90566400 | -0.61862500 |
| C           | 0.82859700              | -0.78764000 | -0.52702700 |
| C           | 1.64347000              | 0.47865300  | -0.60802500 |
| C           | 4.13628400              | 0.81826100  | -1.05040700 |
| C           | 3.34398800              | 0.16537000  | 1.20160700  |
| O           | 3.16940500              | 1.21010500  | 1.77826600  |
| O           | 3.92813300              | 1.50858900  | -2.01418900 |
| C           | 0.97779400              | -3.09665300 | -0.58160100 |
| C           | -0.26529000             | -3.18420100 | -0.44918000 |
| C           | -1.23302000             | -2.18885000 | -0.37903600 |
| C           | -0.58257000             | -0.89403500 | -0.40423100 |
| C           | -2.68223200             | -2.43062200 | -0.25118200 |
| C           | -1.32939800             | 0.30684900  | -0.24922800 |
| C           | -1.94991400             | 1.34509400  | -0.09711100 |
| C           | -2.74706700             | 2.51396800  | 0.07012900  |
| C           | -2.18395200             | 3.80265900  | -0.03897600 |
| C           | -2.98230500             | 4.93381300  | 0.12034900  |
| C           | -4.34858000             | 4.80194100  | 0.38997000  |
| C           | -4.91597400             | 3.52800200  | 0.50148000  |
| C           | -4.12649300             | 2.39056500  | 0.34500500  |
| C           | -3.11813200             | -3.58705300 | 0.42320700  |
| C           | -4.47632100             | -3.86735600 | 0.56235300  |
| C           | -5.43048500             | -3.00160500 | 0.01865100  |
| C           | -5.01104400             | -1.86183700 | -0.67290300 |
| C           | -3.65142900             | -1.57662800 | -0.80845400 |

|   |             |             |             |
|---|-------------|-------------|-------------|
| O | 3.76906500  | -0.95024100 | 1.80446600  |
| C | 4.02775300  | -0.84605000 | 3.20532600  |
| O | 5.35367900  | 0.62545900  | -0.51761600 |
| C | 6.43649800  | 1.32072000  | -1.13840200 |
| H | 3.83025400  | -2.09278600 | -0.19678700 |
| H | 3.41670100  | -1.53942500 | -1.83753600 |
| H | 1.32191700  | 1.26171200  | 0.09124000  |
| H | 1.60865000  | 0.90819300  | -1.62238400 |
| H | -1.11744200 | 3.90103800  | -0.24961900 |
| H | -2.53554000 | 5.92711000  | 0.03396900  |
| H | -4.97048600 | 5.69145100  | 0.51469200  |
| H | -5.98232100 | 3.42112700  | 0.71444700  |
| H | -4.56137900 | 1.39320300  | 0.43537300  |
| H | -2.37176500 | -4.26169800 | 0.84961800  |
| H | -4.79242000 | -4.76543300 | 1.09842000  |
| H | -6.49571700 | -3.21957900 | 0.12595000  |
| H | -5.74815400 | -1.19077000 | -1.12078400 |
| H | -3.33999500 | -0.69607900 | -1.36793700 |
| H | 4.33349300  | -1.84632500 | 3.53404500  |
| H | 4.82838900  | -0.11584700 | 3.39512300  |
| H | 3.12400500  | -0.52211400 | 3.74185500  |
| H | 7.33601900  | 1.05235600  | -0.57196100 |
| H | 6.53958000  | 1.01705500  | -2.19074200 |
| H | 6.26871800  | 2.40714700  | -1.10145700 |

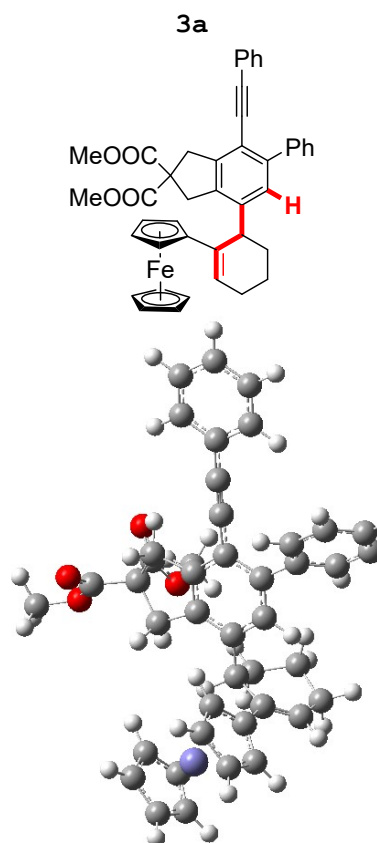

| Atomic Type | Coordinates (Angstroms) |             |             |
|-------------|-------------------------|-------------|-------------|
|             | X                       | Y           | Z           |
| C           | -0.55266700             | 3.12577500  | 0.12002500  |
| C           | 0.67816300              | 2.17752300  | 0.17235100  |
| C           | 0.04106900              | 0.81855500  | 0.34618400  |
| C           | -1.29704200             | 0.86140300  | -0.05127500 |
| C           | -1.67940300             | 2.25133500  | -0.49021800 |
| C           | -0.24524200             | 4.35878600  | -0.72271900 |
| C           | -1.00925400             | 3.59547900  | 1.50689500  |
| O           | -2.00548800             | 4.25197700  | 1.67917100  |
| O           | -0.56756200             | 4.52256600  | -1.87088200 |
| C           | 0.62427000              | -0.36698600 | 0.80579300  |

|    |             |             |             |
|----|-------------|-------------|-------------|
| C  | -0.18325700 | -1.51182300 | 0.83797300  |
| C  | -1.52737400 | -1.50599700 | 0.43713000  |
| C  | -2.10959500 | -0.28604100 | -0.01479400 |
| C  | -2.31312900 | -2.76387500 | 0.51526500  |
| C  | -3.48143100 | -0.19297100 | -0.38167600 |
| C  | -4.65886100 | -0.11745100 | -0.68719900 |
| C  | -6.03861500 | -0.12183600 | -1.04202800 |
| C  | -6.67871800 | 1.04447500  | -1.51063100 |
| C  | -8.02825500 | 1.01458400  | -1.85775600 |
| C  | -8.76069800 | -0.17178800 | -1.74475700 |
| C  | -8.13481500 | -1.33373500 | -1.28027500 |
| C  | -6.78635000 | -1.31453000 | -0.92985500 |
| C  | -2.26026700 | -3.55827300 | 1.67391300  |
| C  | -2.98563500 | -4.74793400 | 1.76236200  |
| C  | -3.77556500 | -5.16946300 | 0.68977600  |
| C  | -3.82946300 | -4.39385800 | -0.47253800 |
| C  | -3.10685800 | -3.20312400 | -0.55919200 |
| O  | -0.21162100 | 3.18918800  | 2.50536300  |
| C  | -0.60834400 | 3.57776100  | 3.82131300  |
| O  | 0.50137900  | 5.23064300  | -0.02432400 |
| C  | 0.88402500  | 6.42689500  | -0.70464100 |
| H  | 1.38189300  | 2.46246100  | 0.96113200  |
| H  | 1.21822600  | 2.21852600  | -0.79133900 |
| H  | -2.67624700 | 2.56923400  | -0.15675400 |
| H  | -1.65740900 | 2.34670200  | -1.58834600 |
| H  | -6.10365900 | 1.96825400  | -1.59733000 |
| H  | -8.51366000 | 1.92427400  | -2.21929700 |
| H  | -9.81849100 | -0.19056500 | -2.01748900 |
| H  | -8.70393300 | -2.26210900 | -1.18932200 |
| H  | -6.29076200 | -2.21637600 | -0.56497400 |
| H  | -1.65859200 | -3.22417200 | 2.52214800  |
| H  | -2.93830700 | -5.34493800 | 2.67642500  |
| H  | -4.34453300 | -6.09983400 | 0.75752400  |
| H  | -4.43353600 | -4.72148200 | -1.32235800 |
| H  | -3.14672500 | -2.61121300 | -1.47411400 |
| H  | 0.12728800  | 3.13585500  | 4.50387400  |
| H  | -0.61202100 | 4.67376900  | 3.91455000  |
| H  | -1.61771400 | 3.20357200  | 4.04636900  |
| H  | 1.47406600  | 7.01038500  | 0.01195000  |
| H  | 1.48466000  | 6.19134900  | -1.59580200 |
| H  | -0.00518600 | 6.99215700  | -1.02036500 |
| H  | 0.25928200  | -2.45563500 | 1.15937500  |
| C  | 2.06375800  | -0.36755300 | 1.29336400  |
| C  | 2.77382100  | -1.68945800 | 1.06138700  |
| C  | 2.14214700  | 0.06434700  | 2.77502800  |
| H  | 2.59916000  | 0.38772400  | 0.70019300  |
| C  | 3.16572700  | -1.99340400 | -0.32543200 |
| C  | 3.03832300  | -2.53286300 | 2.07774100  |
| C  | 1.75204300  | -1.08192400 | 3.70492800  |
| H  | 1.49450500  | 0.94013800  | 2.93457400  |
| H  | 3.17754200  | 0.38001000  | 2.99482800  |
| C  | 2.57880000  | -1.43860000 | -1.51551800 |
| C  | 4.23570200  | -2.85221200 | -0.74941100 |
| C  | 2.69837800  | -2.27183100 | 3.51959200  |
| H  | 3.55234500  | -3.47431800 | 1.85945600  |
| H  | 1.75708200  | -0.75017400 | 4.75549400  |
| H  | 0.71752700  | -1.39041800 | 3.47915200  |
| C  | 3.27065600  | -1.96107300 | -2.64733600 |
| H  | 1.74657800  | -0.74059400 | -1.54642400 |
| C  | 4.29609400  | -2.83400700 | -2.17395500 |
| H  | 4.91357500  | -3.39080400 | -0.09081900 |
| H  | 2.26721500  | -3.18290000 | 3.97043300  |
| H  | 3.63950900  | -2.09414900 | 4.07708200  |
| H  | 3.06806600  | -1.71399900 | -3.68772500 |
| Fe | 4.56716500  | -0.93091900 | -1.41494700 |
| H  | 5.02153500  | -3.36282900 | -2.78940500 |
| C  | 5.31722300  | 0.68463700  | -2.46256000 |

|   |            |             |             |
|---|------------|-------------|-------------|
| C | 4.69316600 | 1.12259200  | -1.25404300 |
| C | 6.37392700 | -0.21094100 | -2.11377800 |
| H | 5.02073400 | 0.96271400  | -3.47231400 |
| C | 5.36519900 | 0.49732100  | -0.15842200 |
| H | 3.83969600 | 1.79463700  | -1.18317900 |
| C | 6.40292700 | -0.32716200 | -0.69004000 |
| H | 7.02409200 | -0.73543300 | -2.81172100 |
| H | 5.11066700 | 0.60036300  | 0.89503700  |
| H | 7.07810300 | -0.95580600 | -0.11232900 |

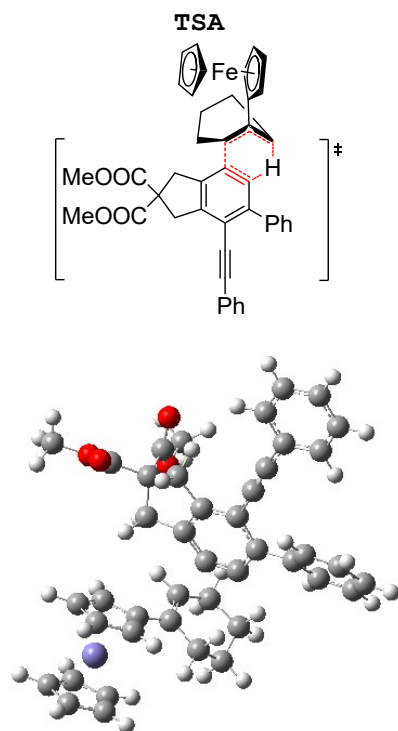

| Atomic Type | Coordinates (Angstroms) |             |             |
|-------------|-------------------------|-------------|-------------|
|             | X                       | Y           | Z           |
| C           | -0.70503200             | 2.96442100  | 0.43917300  |
| C           | 0.51152900              | 1.99775200  | 0.53283200  |
| C           | -0.15045000             | 0.65025500  | 0.59940000  |
| C           | -1.48134500             | 0.71297000  | 0.14065700  |
| C           | -1.81918500             | 2.13058900  | -0.25000300 |
| C           | -0.33068000             | 4.20901600  | -0.35881600 |
| C           | -1.22535700             | 3.42097000  | 1.80794300  |
| O           | -2.22456000             | 4.08317200  | 1.93881100  |
| O           | -0.60224300             | 4.41481000  | -1.51300000 |
| C           | 0.20324700              | -0.63271300 | 0.96088300  |
| C           | -0.48472700             | -1.70632200 | 0.89578300  |
| C           | -1.80745000             | -1.72647100 | 0.42989900  |
| C           | -2.31466100             | -0.43011500 | 0.05342300  |
| C           | -2.59518200             | -2.97873500 | 0.35398600  |
| C           | -3.65929700             | -0.23965500 | -0.37434500 |
| C           | -4.81363000             | -0.05902900 | -0.72277600 |
| C           | -6.17200900             | 0.05494400  | -1.13692300 |
| C           | -6.69931000             | 1.28287500  | -1.58879300 |
| C           | -8.02917500             | 1.36999300  | -1.99683100 |
| C           | -8.85437400             | 0.24098600  | -1.96250600 |
| C           | -8.34123500             | -0.98127500 | -1.51501900 |
| C           | -7.01344500             | -1.07875900 | -1.10372500 |
| C           | -2.38642100             | -3.97248200 | 1.32848500  |
| C           | -3.09306500             | -5.17389200 | 1.29586000  |
| C           | -4.01820700             | -5.41697100 | 0.27564100  |
| C           | -4.21897800             | -4.44984900 | -0.71306200 |
| C           | -3.51669700             | -3.24351100 | -0.67572800 |
| O           | -0.47784800             | 3.00125300  | 2.83746700  |
| C           | -0.93511100             | 3.37905100  | 4.13620800  |

|    |             |             |             |
|----|-------------|-------------|-------------|
| O  | 0.41101400  | 5.04185900  | 0.39288900  |
| C  | 0.85040900  | 6.24402500  | -0.23966500 |
| H  | 1.15721000  | 2.23044400  | 1.38605800  |
| H  | 1.12377500  | 2.06657100  | -0.38220400 |
| H  | -2.82184200 | 2.45370900  | 0.06026700  |
| H  | -1.75484100 | 2.26995300  | -1.34151500 |
| H  | -6.05217200 | 2.16160400  | -1.61447900 |
| H  | -8.42618100 | 2.32677700  | -2.34453100 |
| H  | -9.89639300 | 0.31388200  | -2.28277000 |
| H  | -8.98287700 | -1.86528500 | -1.48466700 |
| H  | -6.60697400 | -2.02831800 | -0.74988900 |
| H  | -1.66067500 | -3.78039100 | 2.12159200  |
| H  | -2.92192600 | -5.92531700 | 2.07084400  |
| H  | -4.57253900 | -6.35825400 | 0.24684000  |
| H  | -4.92243600 | -4.63769700 | -1.52833300 |
| H  | -3.67048800 | -2.50944400 | -1.46544000 |
| H  | -0.23152700 | 2.93297000  | 4.84926300  |
| H  | -0.94544700 | 4.47439000  | 4.23843100  |
| H  | -1.95328400 | 3.00205300  | 4.31193900  |
| H  | 1.42491700  | 6.79439100  | 0.51493600  |
| H  | 1.48082500  | 6.01585300  | -1.11213800 |
| H  | -0.01039700 | 6.84032800  | -0.57649000 |
| H  | 1.64564000  | -2.93518800 | 0.23668800  |
| C  | 2.36060000  | -0.64688100 | 1.93614100  |
| C  | 2.74687300  | -1.21806600 | 0.75652100  |
| C  | 2.13190800  | -1.41288200 | 3.21262800  |
| H  | 2.40600600  | 0.44098400  | 2.02905400  |
| C  | 3.10004100  | -0.39626800 | -0.40133700 |
| C  | 2.67324200  | -2.70712600 | 0.59840100  |
| C  | 1.95651600  | -2.92055300 | 2.99960200  |
| H  | 1.25817600  | -0.99562800 | 3.74012400  |
| H  | 2.99894500  | -1.21691600 | 3.87376600  |
| C  | 3.63667700  | 0.93759500  | -0.38608400 |
| C  | 2.99237700  | -0.79149500 | -1.77971500 |
| C  | 2.89912200  | -3.45140800 | 1.91861400  |
| H  | 3.37333700  | -3.04661800 | -0.17842000 |
| H  | 2.10876000  | -3.45483300 | 3.95099000  |
| H  | 0.92024500  | -3.11356900 | 2.68145000  |
| C  | 3.84297800  | 1.35515600  | -1.73305400 |
| H  | 3.87784600  | 1.51391100  | 0.50420300  |
| C  | 3.44210500  | 0.28781800  | -2.59324100 |
| H  | 2.62535700  | -1.75092900 | -2.13638300 |
| H  | 2.73865100  | -4.53115200 | 1.76981600  |
| H  | 3.95054200  | -3.32831900 | 2.23600400  |
| H  | 4.26710900  | 2.30612400  | -2.04968300 |
| Fe | 4.94470300  | -0.34574000 | -1.31749600 |
| H  | 3.49715900  | 0.28711200  | -3.68011600 |
| C  | 6.93840700  | 0.09055900  | -1.63751100 |
| C  | 6.72505500  | -0.28300500 | -0.27496000 |
| C  | 6.53314600  | -1.00194600 | -2.46346200 |
| H  | 7.31691900  | 1.04973800  | -1.98622600 |
| C  | 6.18905100  | -1.60659600 | -0.25918200 |
| H  | 6.91267000  | 0.34082200  | 0.59709200  |
| C  | 6.06902900  | -2.05091700 | -1.61165300 |
| H  | 6.54859600  | -1.02147400 | -3.55167400 |
| H  | 5.88989600  | -2.16405100 | 0.62662300  |
| H  | 5.67050800  | -3.01004800 | -1.93756500 |

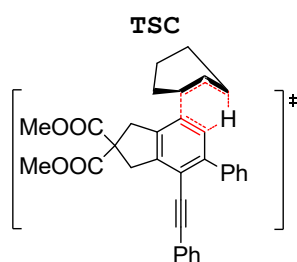

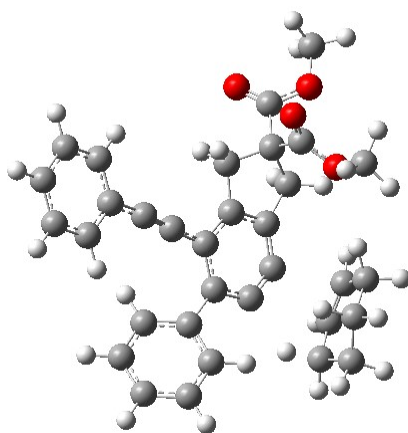

| Atomic Type | Coordinates (Angstroms) |             |             |
|-------------|-------------------------|-------------|-------------|
|             | X                       | Y           | Z           |
| C           | -2.24089400             | -2.04268600 | -0.38463000 |
| C           | -2.82685600             | -0.74233500 | -1.00798200 |
| C           | -1.67168500             | 0.21443500  | -0.89255700 |
| C           | -0.45695400             | -0.47453700 | -0.70720000 |
| C           | -0.71593100             | -1.96035000 | -0.67174500 |
| C           | -2.88553200             | -3.27812800 | -1.00496700 |
| C           | -2.43259200             | -2.12672400 | 1.13470700  |
| O           | -1.99119300             | -3.03099200 | 1.79817100  |
| O           | -2.39461700             | -3.97790000 | -1.85197100 |
| C           | -1.50364300             | 1.58442600  | -0.91172600 |
| C           | -0.41089900             | 2.23750900  | -0.78308300 |
| C           | 0.84255400              | 1.63285200  | -0.63261200 |
| C           | 0.78551400              | 0.19311900  | -0.57321800 |
| C           | 2.09228700              | 2.41517700  | -0.49474600 |
| C           | 1.94444400              | -0.59293400 | -0.31619000 |
| C           | 2.92962500              | -1.27048800 | -0.07836700 |
| C           | 4.13495200              | -1.98320600 | 0.18448600  |
| C           | 4.16339300              | -3.39343300 | 0.20069200  |
| C           | 5.35559000              | -4.07002500 | 0.45267700  |
| C           | 6.53537400              | -3.35761700 | 0.69211500  |
| C           | 6.51731000              | -1.95869600 | 0.67926800  |
| C           | 5.33051600              | -1.27261500 | 0.42935000  |
| C           | 2.05912100              | 3.63973300  | 0.19775000  |
| C           | 3.20986300              | 4.41276000  | 0.34784600  |
| C           | 4.42065600              | 3.98411200  | -0.20506200 |
| C           | 4.46401600              | 2.78072500  | -0.91464900 |
| C           | 3.31341200              | 2.00292400  | -1.05815500 |
| O           | -3.11266200             | -1.09434400 | 1.65593000  |
| C           | -3.29023600             | -1.11501100 | 3.07364600  |
| O           | -4.12359200             | -3.45584300 | -0.51308500 |
| C           | -4.85187800             | -4.57618100 | -1.01761700 |
| H           | -3.73949700             | -0.41464700 | -0.49838300 |
| H           | -3.07405800             | -0.91611200 | -2.07033100 |
| H           | -0.12710300             | -2.49913900 | 0.08256200  |
| H           | -0.50537100             | -2.43062400 | -1.64622500 |
| H           | 3.24076600              | -3.94585900 | 0.01310600  |
| H           | 5.36522100              | -5.16258700 | 0.46281100  |
| H           | 7.46758200              | -3.89202800 | 0.88972500  |
| H           | 7.43634000              | -1.39837500 | 0.86762400  |
| H           | 5.30780300              | -0.18106500 | 0.42081500  |
| H           | 1.11250700              | 3.97284100  | 0.62834600  |
| H           | 3.16263600              | 5.35467600  | 0.90007000  |
| H           | 5.32344500              | 4.58894500  | -0.09033200 |
| H           | 5.39999400              | 2.44633700  | -1.36937200 |
| H           | 3.35887800              | 1.07649200  | -1.62950800 |
| H           | -3.82177300             | -0.18998500 | 3.32699400  |
| H           | -3.87922000             | -1.99382900 | 3.37453200  |
| H           | -2.31686000             | -1.15326000 | 3.58379200  |

|   |             |             |             |
|---|-------------|-------------|-------------|
| H | -5.82193200 | -4.56527500 | -0.50666000 |
| H | -4.98926600 | -4.49194500 | -2.10593300 |
| H | -4.31575700 | -5.51244400 | -0.80331400 |
| H | -1.17438200 | 4.15902200  | -0.76304500 |
| C | -3.57568500 | 2.63958700  | -0.46370100 |
| C | -3.13064200 | 3.71428800  | -1.16889300 |
| C | -3.49602200 | 2.55412500  | 1.04247400  |
| H | -4.22461700 | 1.91426100  | -0.96424900 |
| C | -2.18044200 | 4.66569800  | -0.57459400 |
| C | -2.42505400 | 3.47269700  | 1.64787000  |
| H | -3.32396100 | 1.50950000  | 1.34558900  |
| H | -4.49653400 | 2.82091800  | 1.43500900  |
| C | -2.34975900 | 4.83220500  | 0.94155700  |
| H | -2.15036400 | 5.62794200  | -1.10727800 |
| H | -2.61829100 | 3.61167000  | 2.72385000  |
| H | -1.44572500 | 2.97741400  | 1.56559400  |
| H | -1.51250400 | 5.42077200  | 1.35061600  |
| H | -3.26809400 | 5.41230600  | 1.14124000  |
| H | -3.31689300 | 3.75828400  | -2.24645300 |

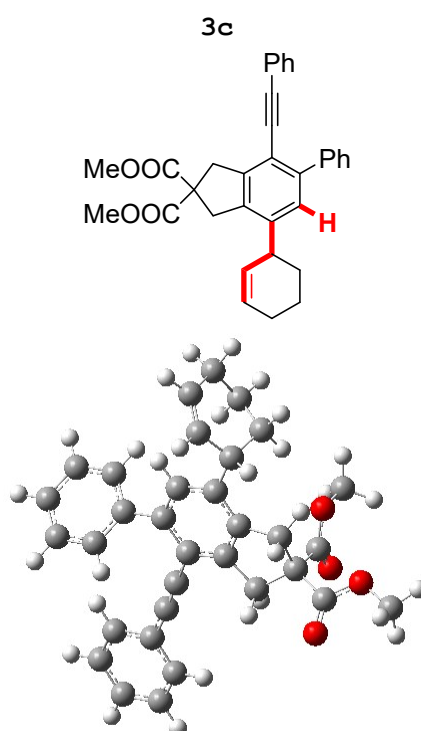

| Atomic Type | Coordinates (Angstroms) |             |             |
|-------------|-------------------------|-------------|-------------|
|             | X                       | Y           | Z           |
| C           | -2.06447400             | -2.18322600 | -0.32674600 |
| C           | -2.71709300             | -0.90311300 | -0.92012700 |
| C           | -1.62161400             | 0.12730200  | -0.76624600 |
| C           | -0.38736500             | -0.50830800 | -0.61458700 |
| C           | -0.55256700             | -2.00605000 | -0.62240800 |
| C           | -2.64521000             | -3.43726000 | -0.97098900 |
| C           | -2.24323600             | -2.30226000 | 1.19196000  |
| O           | -1.72285700             | -3.17151500 | 1.84525200  |
| O           | -2.13240900             | -4.07626600 | -1.85274700 |
| C           | -1.72292500             | 1.52411100  | -0.76614300 |
| C           | -0.53447700             | 2.25357800  | -0.62265300 |
| C           | 0.72256000              | 1.64610300  | -0.48152400 |
| C           | 0.80471800              | 0.22426600  | -0.46922600 |
| C           | 1.92778400              | 2.49904100  | -0.32003900 |
| C           | 2.03541500              | -0.46129900 | -0.26682100 |
| C           | 3.09031500              | -1.04394000 | -0.08488600 |
| C           | 4.36602100              | -1.64555100 | 0.11597300  |
| C           | 4.52059000              | -3.04752000 | 0.13175200  |
| C           | 5.77945900              | -3.61397300 | 0.32414100  |



|   |             |             |             |
|---|-------------|-------------|-------------|
| C | 6.90142900  | -2.79802800 | 0.50337200  |
| C | 6.75820900  | -1.40630400 | 0.48995500  |
| C | 5.50407200  | -0.82982700 | 0.29923100  |
| C | 1.91546000  | 3.57588700  | 0.58376700  |
| C | 3.03696300  | 4.39196800  | 0.74371200  |
| C | 4.19339900  | 4.14958500  | -0.00199900 |
| C | 4.21618400  | 3.08773700  | -0.91160800 |
| C | 3.09601700  | 2.27034600  | -1.06878500 |
| O | -3.01025400 | -1.33930200 | 1.72387100  |
| C | -3.18250800 | -1.38632400 | 3.14089700  |
| O | -3.85660400 | -3.71074300 | -0.45729500 |
| C | -4.52623300 | -4.85615600 | -0.98576000 |
| H | -3.65993400 | -0.65460000 | -0.42220100 |
| H | -2.93508400 | -1.06411800 | -1.99149200 |
| H | 0.07684400  | -2.53077600 | 0.10861300  |
| H | -0.32528100 | -2.43146900 | -1.61377900 |
| H | 3.64255500  | -3.68074600 | -0.00843100 |
| H | 5.88701400  | -4.70125900 | 0.33483000  |
| H | 7.88627900  | -3.24629300 | 0.65435100  |
| H | 7.63203900  | -0.76553400 | 0.63100300  |
| H | 5.38343100  | 0.25525900  | 0.28933200  |
| H | 1.02064100  | 3.75848100  | 1.18299500  |
| H | 3.00917300  | 5.21701200  | 1.45976100  |
| H | 5.07239600  | 4.78654500  | 0.12274000  |
| H | 5.11117300  | 2.89736900  | -1.50930000 |
| H | 3.12038600  | 1.45143300  | -1.78840400 |
| H | -3.79565700 | -0.51544400 | 3.40171000  |
| H | -3.68822900 | -2.31724800 | 3.43682100  |
| H | -2.20870900 | -1.33941600 | 3.64979100  |
| H | -5.48153200 | -4.92493100 | -0.45201600 |
| H | -4.69683700 | -4.74193800 | -2.06663200 |
| H | -3.92746100 | -5.76379700 | -0.81947900 |
| H | -0.58528700 | 3.34306900  | -0.63820400 |
| C | -3.08623600 | 2.19844900  | -0.83820900 |
| C | -3.02429400 | 3.59992200  | -1.39625400 |
| C | -3.78021000 | 2.18788200  | 0.54702200  |
| H | -3.70416600 | 1.59555000  | -1.52581200 |
| C | -3.22511000 | 4.70233200  | -0.66278400 |
| C | -3.24469800 | 3.30815800  | 1.43915100  |
| H | -3.63868500 | 1.20695100  | 1.02454700  |
| H | -4.86558700 | 2.32553600  | 0.39837700  |
| C | -3.51579300 | 4.68106100  | 0.81469200  |
| H | -3.18640600 | 5.68251800  | -1.15067700 |
| H | -3.69261300 | 3.25001700  | 2.44410800  |
| H | -2.15773200 | 3.17158000  | 1.57171500  |
| H | -2.92108600 | 5.46133500  | 1.32105100  |
| H | -4.57226900 | 4.97126800  | 0.97664600  |
| H | -2.78969000 | 3.69472400  | -2.46158600 |
